# Supplementary material for: The Computational Preventive Potential of the Rare Flavonoid, Patuletin, Isolated from Tagetes patula, against SARS-CoV-2
Source: MDPI journal article supplement (doi:10.3390/plants11141886), 2022-07-20
Supplement: s1 [file s1]

## Supporting materials

### Isolation and *in silico* prohibitive activity of the rare flavonoid, patuletin, from *Tagetes patula* against SARS-CoV-2 RNA-dependent RNA polymerase

Ahmed M. Metwaly<sup>1,2\*</sup>, Eslam B. Elkaeed<sup>3</sup>, Bshra A. Alsouk<sup>4</sup>, Abdelrahman M. Saleh<sup>5</sup>, Ahmad E. Mostafa<sup>1</sup>, Ibrahim. H. Eissa<sup>5\*</sup>

<sup>1</sup> Pharmacognosy and Medicinal Plants Department, Faculty of Pharmacy (Boys), Al-Azhar University, Cairo, Egypt [ametwaly@azhar.edu.eg](mailto:ametwaly@azhar.edu.eg); [aemostafa@azhar.edu.eg](mailto:aemostafa@azhar.edu.eg)

<sup>2</sup> Biopharmaceutical Products Research Department, Genetic Engineering and Biotechnology Research Institute, City of Scientific Research and Technological Applications (SRTA-City), Alexandria 21934, Egypt

<sup>3</sup> Department of Pharmaceutical Sciences, College of Pharmacy, AlMaarefa University, Riyadh 13713, Saudi Arabia [ikaheed@mcst.edu.sa](mailto:ikaheed@mcst.edu.sa)

<sup>6</sup> Department of Pharmaceutical Sciences, College of Pharmacy, Princess Nourah bint Abdulrahman University, P.O. Box 84428, Riyadh 11671, Saudi Arabia [baalsouk@pnu.edu.sa](mailto:baalsouk@pnu.edu.sa)

<sup>7</sup> Pharmaceutical Medicinal Chemistry & Drug Design Department, Faculty of Pharmacy (Boys), Al-Azhar University, Cairo 11884, Egypt [ibrahimeissa@azhar.edu.eg](mailto:ibrahimeissa@azhar.edu.eg); [abdo.saleh240@azhar.edu.eg](mailto:abdo.saleh240@azhar.edu.eg)

#### \*Corresponding authors:

Ibrahim H. Eissa

Ahmed M. Metwaly

#### Content

|                 |                      |
|-----------------|----------------------|
| Method          | General              |
|                 | Isolation            |
|                 | Molecular Similarity |
|                 | Docking studies      |
|                 | ADMET studies        |
|                 | Toxicity studies     |
|                 | Molecular dynamics   |
| Spectral data   |                      |
| Toxicity report |                      |

# Method

## 1. General experimental section

NMR spectra were carried out on a commercial instrument (Bruker Avance 500 MHz), chemical shifts ( $\delta$ ) are presented in parts per million (ppm) and re-calculated with respect to tetramethylsilane (TMS) ( $^1\text{H}$ ) or carbon signals of deuterium solvents ( $^{13}\text{C}$ ). Spin-spin coupling constants (J) are given in hertz (Hz). For column chromatography, silica gel 0.06-0.2 mm was used as the stationary phase. Silica gel 32-63 mesh and Sephadex LH-20 were used for column chromatography.

## 2. Isolation

To study the component composition of *Tagetes patula*, were used. Flowers were extracted with 70% ethanol three times. The extracts were combined, the solvent was evaporated on a rotary evaporator at 70 C, and the resulting extract afforded 210 gm of the total extract. The extract was suspended in water and fractionated against hexane,  $\text{CH}_2\text{Cl}_2$ , and n-butanol. Then, the butanol fraction (32 gm) was subjected to a silica gel column to provide 8 different fractions. Fraction 3 was further purified with Sephadex LH-20 to furnish 110 mg of patuletin.

Patuletin's chemical structure was determined by  $^1\text{H}$  and  $^{13}\text{C}$  NMR spectroscopy.

## 3. Molecular Similarity

Molecular Similarity of the tested compound against the nine co-crystallized ligands of SARS-Cov-2 was carried out calculated using Discovery studio 4.0. At first, the CHARMM force field was applied then the compound was prepared using prepare ligand protocol. Then, the tested compound was used as a reference compound while the co-crystallized ligands were used as a test set. The protocol was adjusted to give one output. The default molecular properties were applied. The following parameters were examined in patuletin and in the examined co-crystallized ligands (**F86**, **PRD\_002214**, **GWS**, **X77**, **VXG**, **1N7**, **SAM**, **Y95**, and **XT7**);

- Number of rotatable bonds,
- Number of rings,
- Number of aromatic rings,
- Number of hydrogen bond donor atoms,
- Number of hydrogen bond acceptor atoms,
- Partition coefficient (ALog p),
- Molecular weight (M. Wt), and
- Molecular fractional polar surface area (MFP SA).

#### **4. Molecular Docking studies**

Crystal structure of the examined protein was obtained from Protein Data Bank. The docking investigation was accomplished using MOE2014 software. At first, the crystal structure of target protein was prepared by removing water molecules. Then, the selected chain was protonated and subjected to minimization of energy process. Next, the active site of the target protein was defined. Structures of the tested compounds and the co-crystallized ligand were drawn using ChemBioDraw Ultra 14.0 and saved as MDL-SD format. Such file was opened using MOE to display the 3D structures which were protonated and subjected to energy minimization. Formerly, validation of the docking process was performed by docking the co-crystallized ligand against the isolated pocket of the active site. The produced RMSD value indicated the validity of the process. Finally, docking of the tested compounds was done through the dock option inserted in compute window. For each docked molecule, 30 docked poses were produced using ASE for scoring function and force field for refinement. The results of the docking process were then visualized using Discovery Studio 4.0 software.

## 5. ADMET

The following ADMET descriptors

- Absorption,
- Distribution,
- Metabolism,
- Excretion, and
- Toxicity

of the compounds were determined using Discovery studio 4.0. At first, the CHARMM force field was applied then the tested compounds were prepared and minimized according to the preparation of small molecule protocol. Then ADMET descriptors protocol was applied to carry out these studies.

## 6. Toxicity studies

The toxicity parameters of the tested compounds were calculated using Discovery studio 4.0. Remdesivir was used as a reference drug. At first, the CHARMM force field was applied then the compounds were prepared and minimized according to the preparation of small molecule protocol. Then different parameters were calculated from the toxicity prediction (extensible) protocol.

The examined parameter include

- Ames mutagenicity prediction,
- Carcinogenic potency in rats (R-TD<sub>50</sub>),
- Rat maximum tolerated dose (R-MTD),
- Rat Oral LD<sub>50</sub> (R- LD<sub>50</sub>),
- Chronic (Lowest-observed-adverse-effect level) LOAEL in rats (R- LOAEL),

- Eye, ocular, irritation model (O-Ir), and
- Skin irritation model (S-Ir).

## 7. Molecular dynamics simulations

The system was prepared using the web-based CHARMM-GUI interface with the CHARMM36 force field. All the simulations were done using the NAMD 2.13 package. The TIP3P explicit solvation model was used, and the periodic boundary conditions were set with a dimension of the dimensions Å in x, y, and z, respectively. The parameters for the top docking results were generated using the CHARMM general force field. Afterward, the system was neutralized using -- (Cl<sup>-</sup>/Na<sup>+</sup>) ions. The MD protocols involved minimization, equilibration, and production. A 2 fs time step of integration was chosen for all MD simulations, the equilibration was carried in the canonical (*NVT*) ensemble, while the isothermal–isobaric (*NPT*) ensemble was for the production. Through the 100 ns of MD production, the pressure was set at 1 atm using the Nose–Hoover Langevin piston barostat with a Langevin piston decay of 0.05 ps and a period of 0.1 ps. The temperature was set at 298.15 K using the Langevin thermostat. A distance cutoff of 12.0 Å was applied to short-range nonbonded interactions with a pair list distance of 16 Å, and Lennard Jones interactions were smoothly truncated at 8.0 Å. Long-range electrostatic interactions were treated using the particle-mesh Ewald (PME) method, where a grid spacing of 1.0 Å was used for all simulation cells. All covalent bonds involving hydrogen atoms were constrained using the SHAKE algorithm. For consistency, we have applied the same protocol for all MD simulations.

# **Spectral data NMR of compound 1**

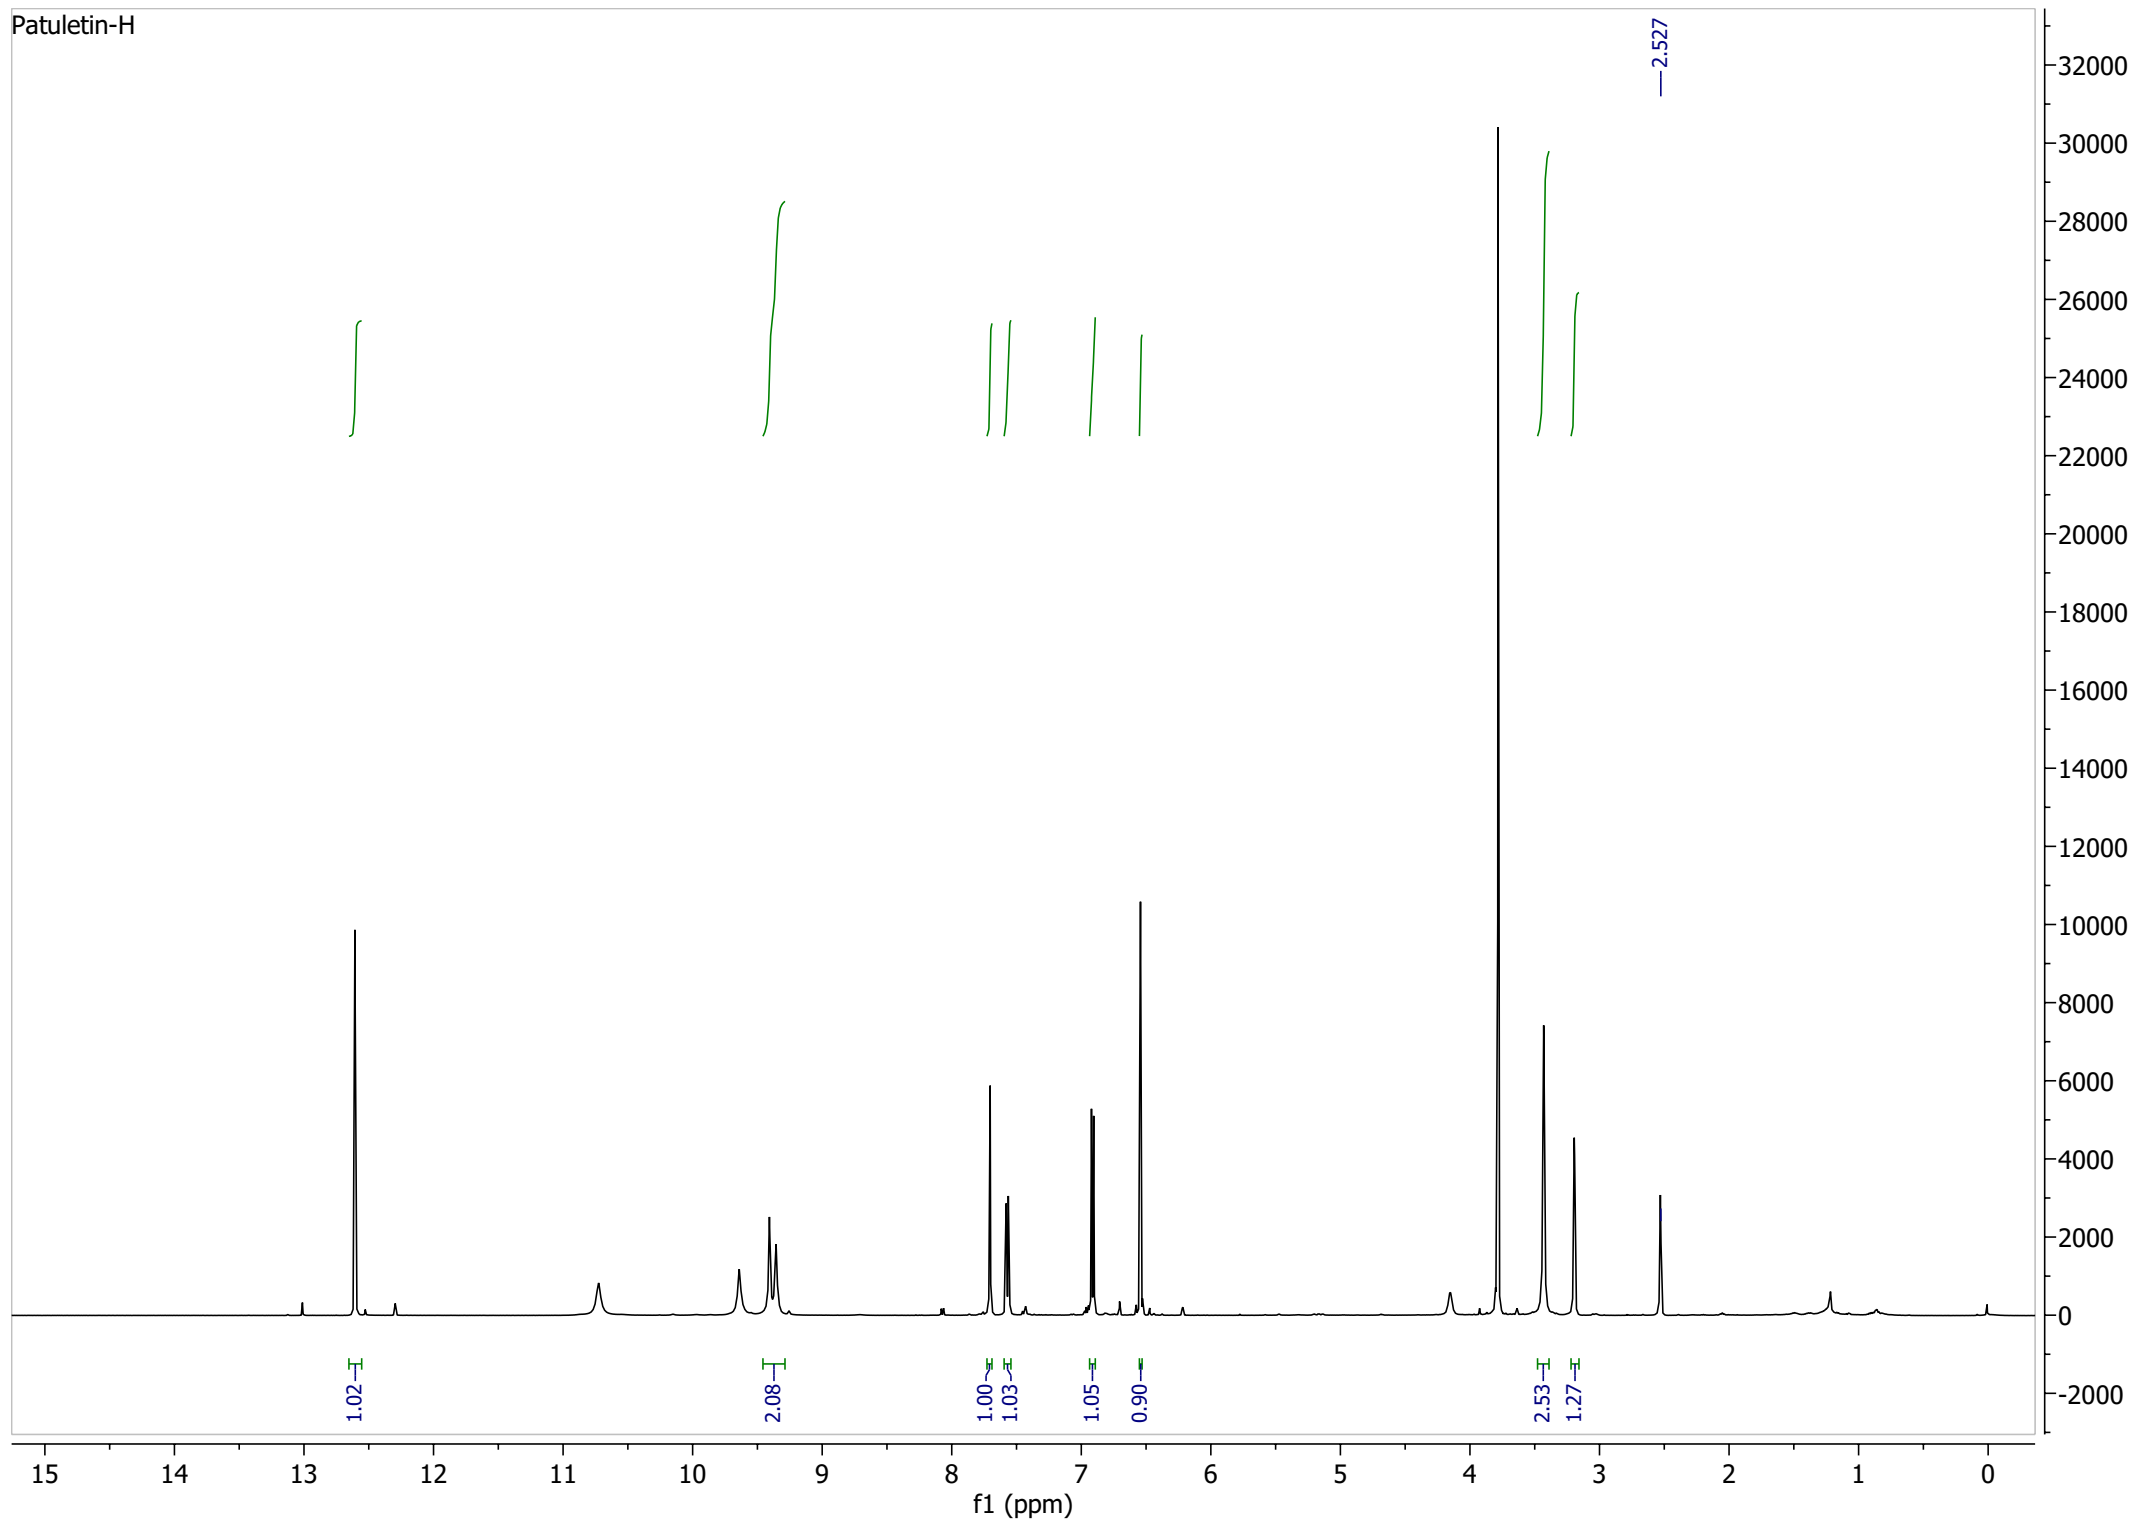



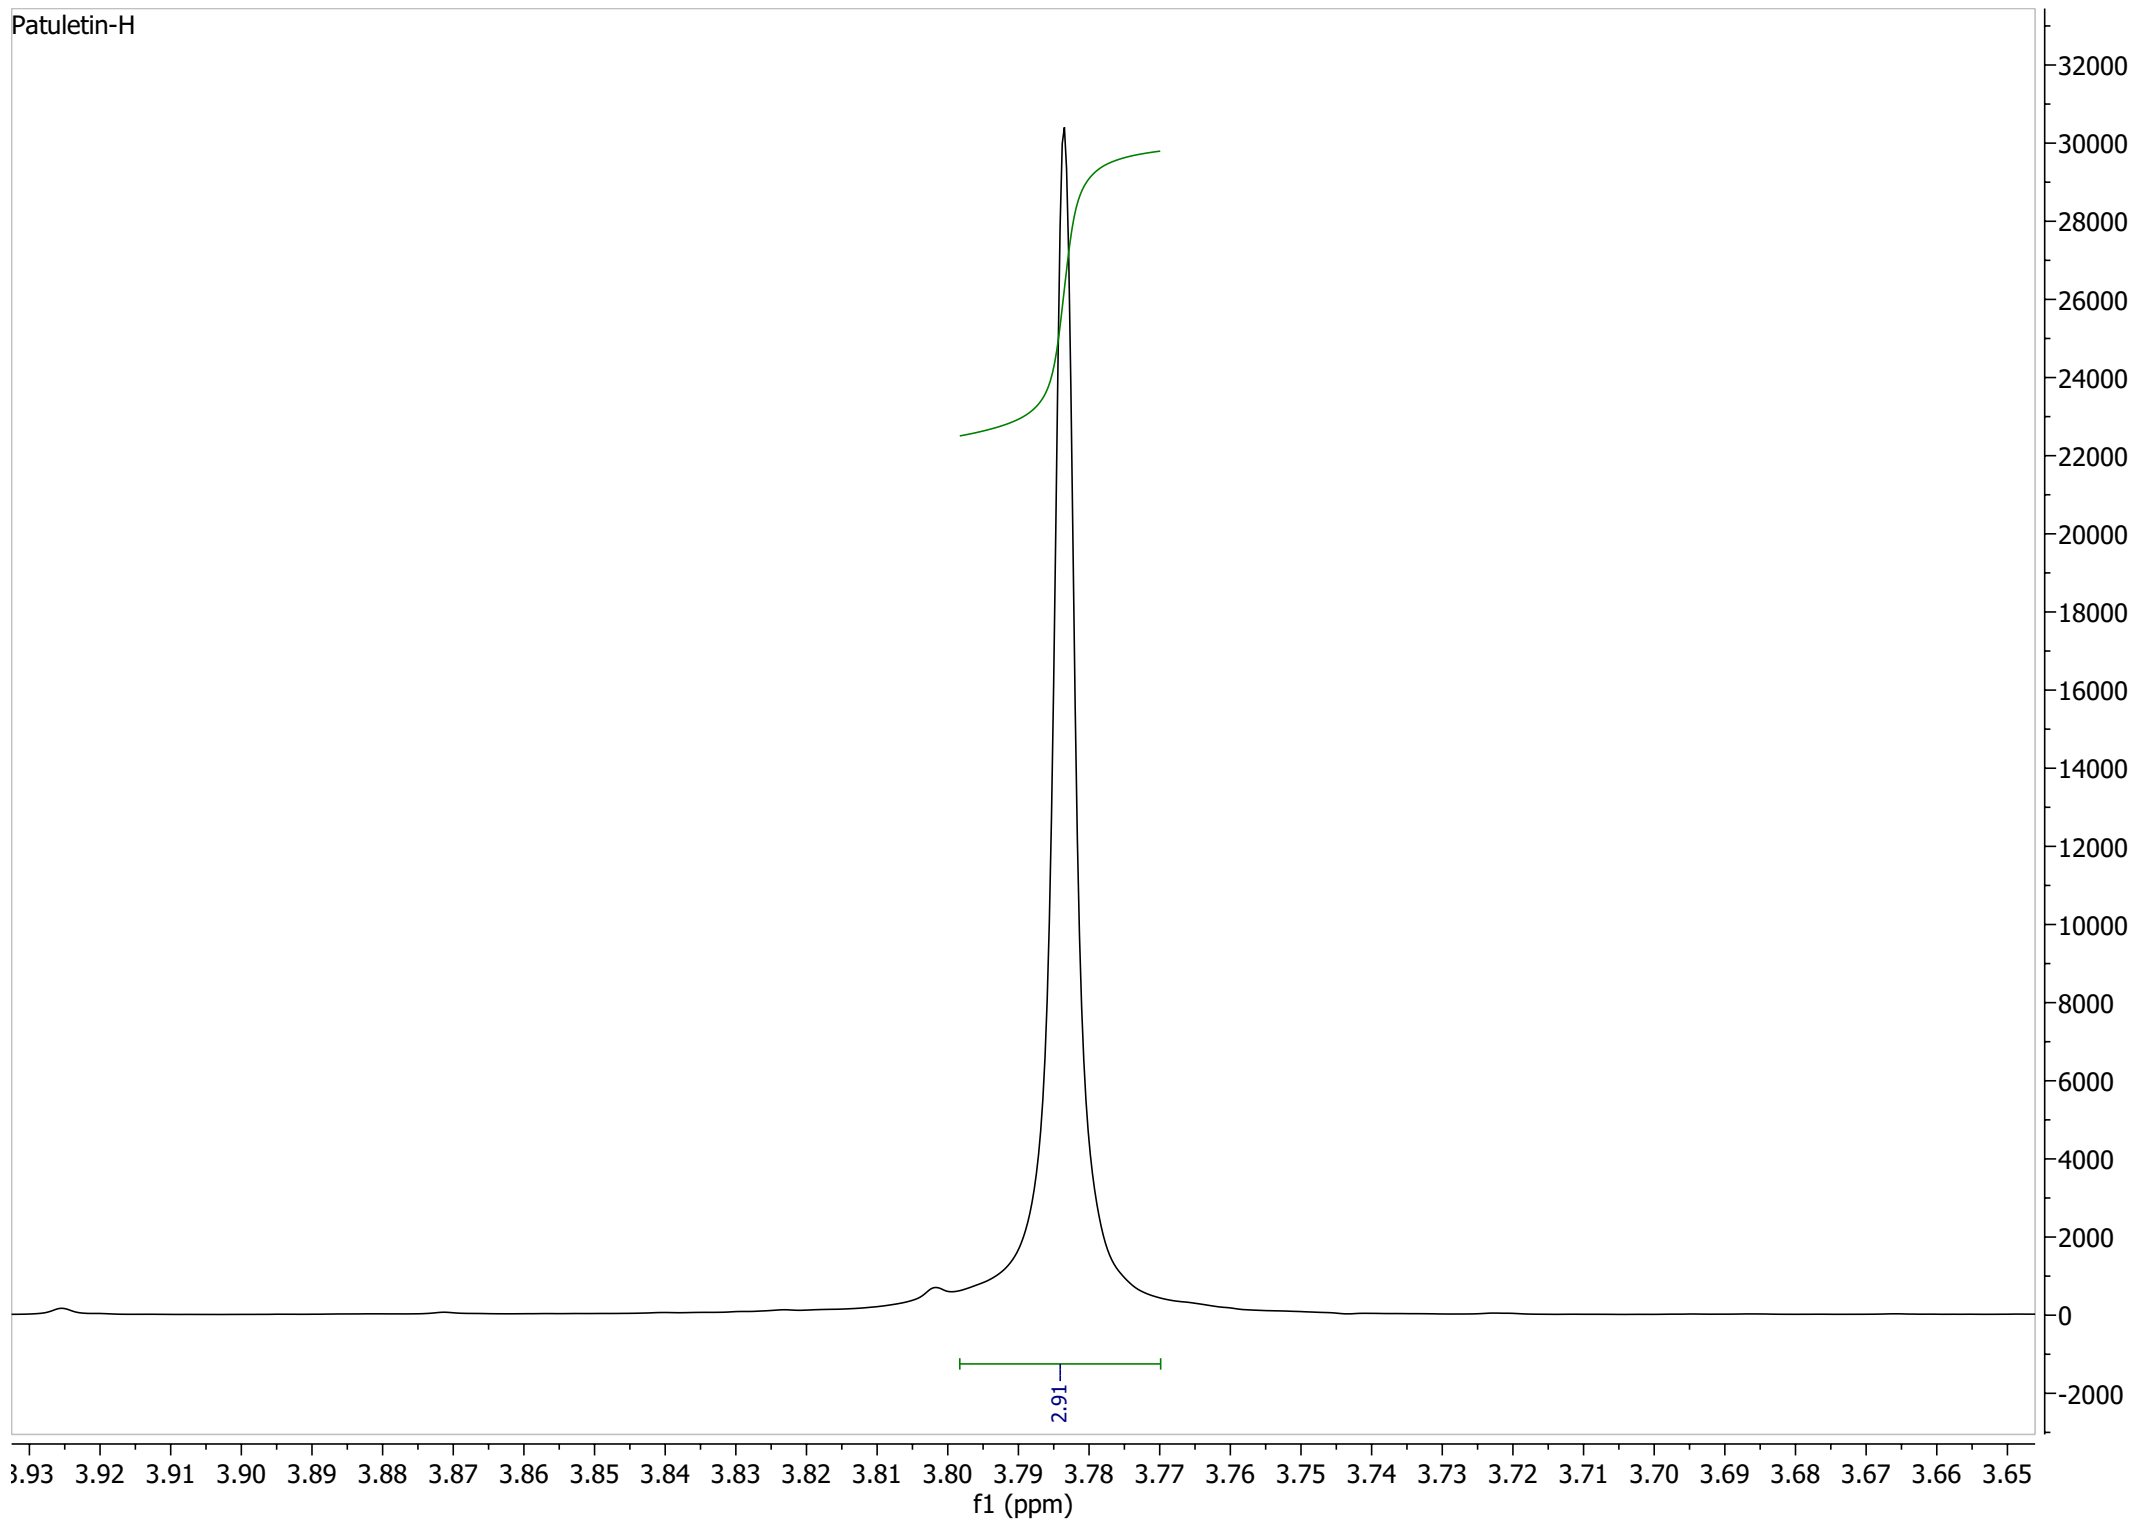

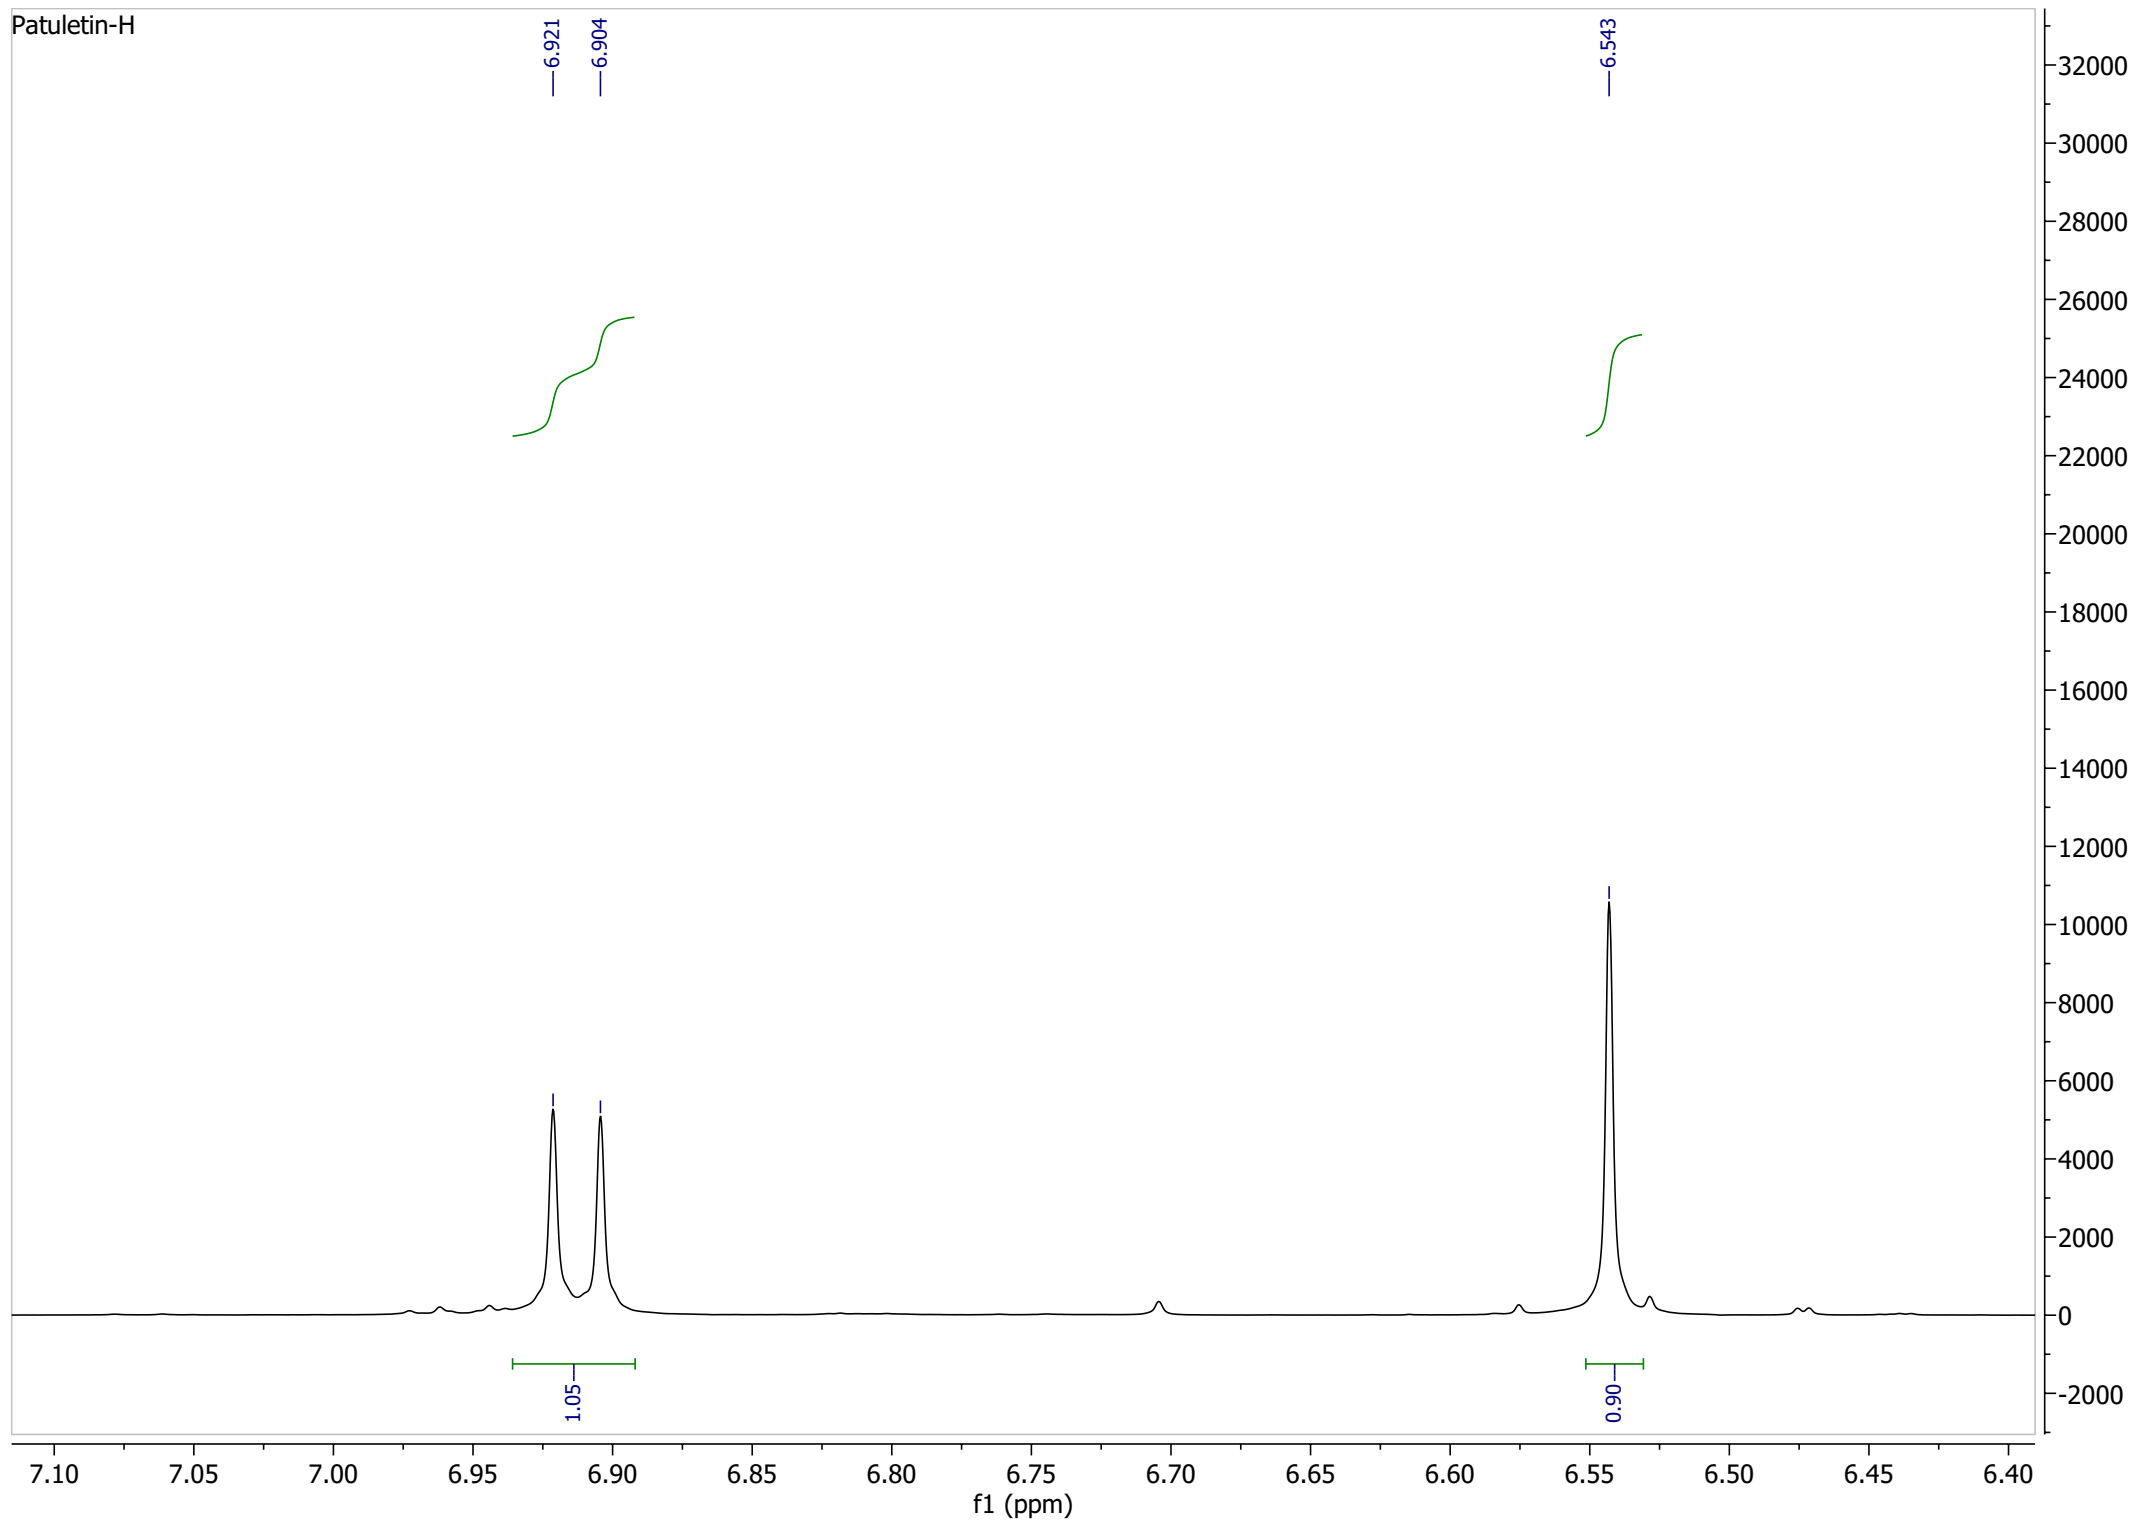

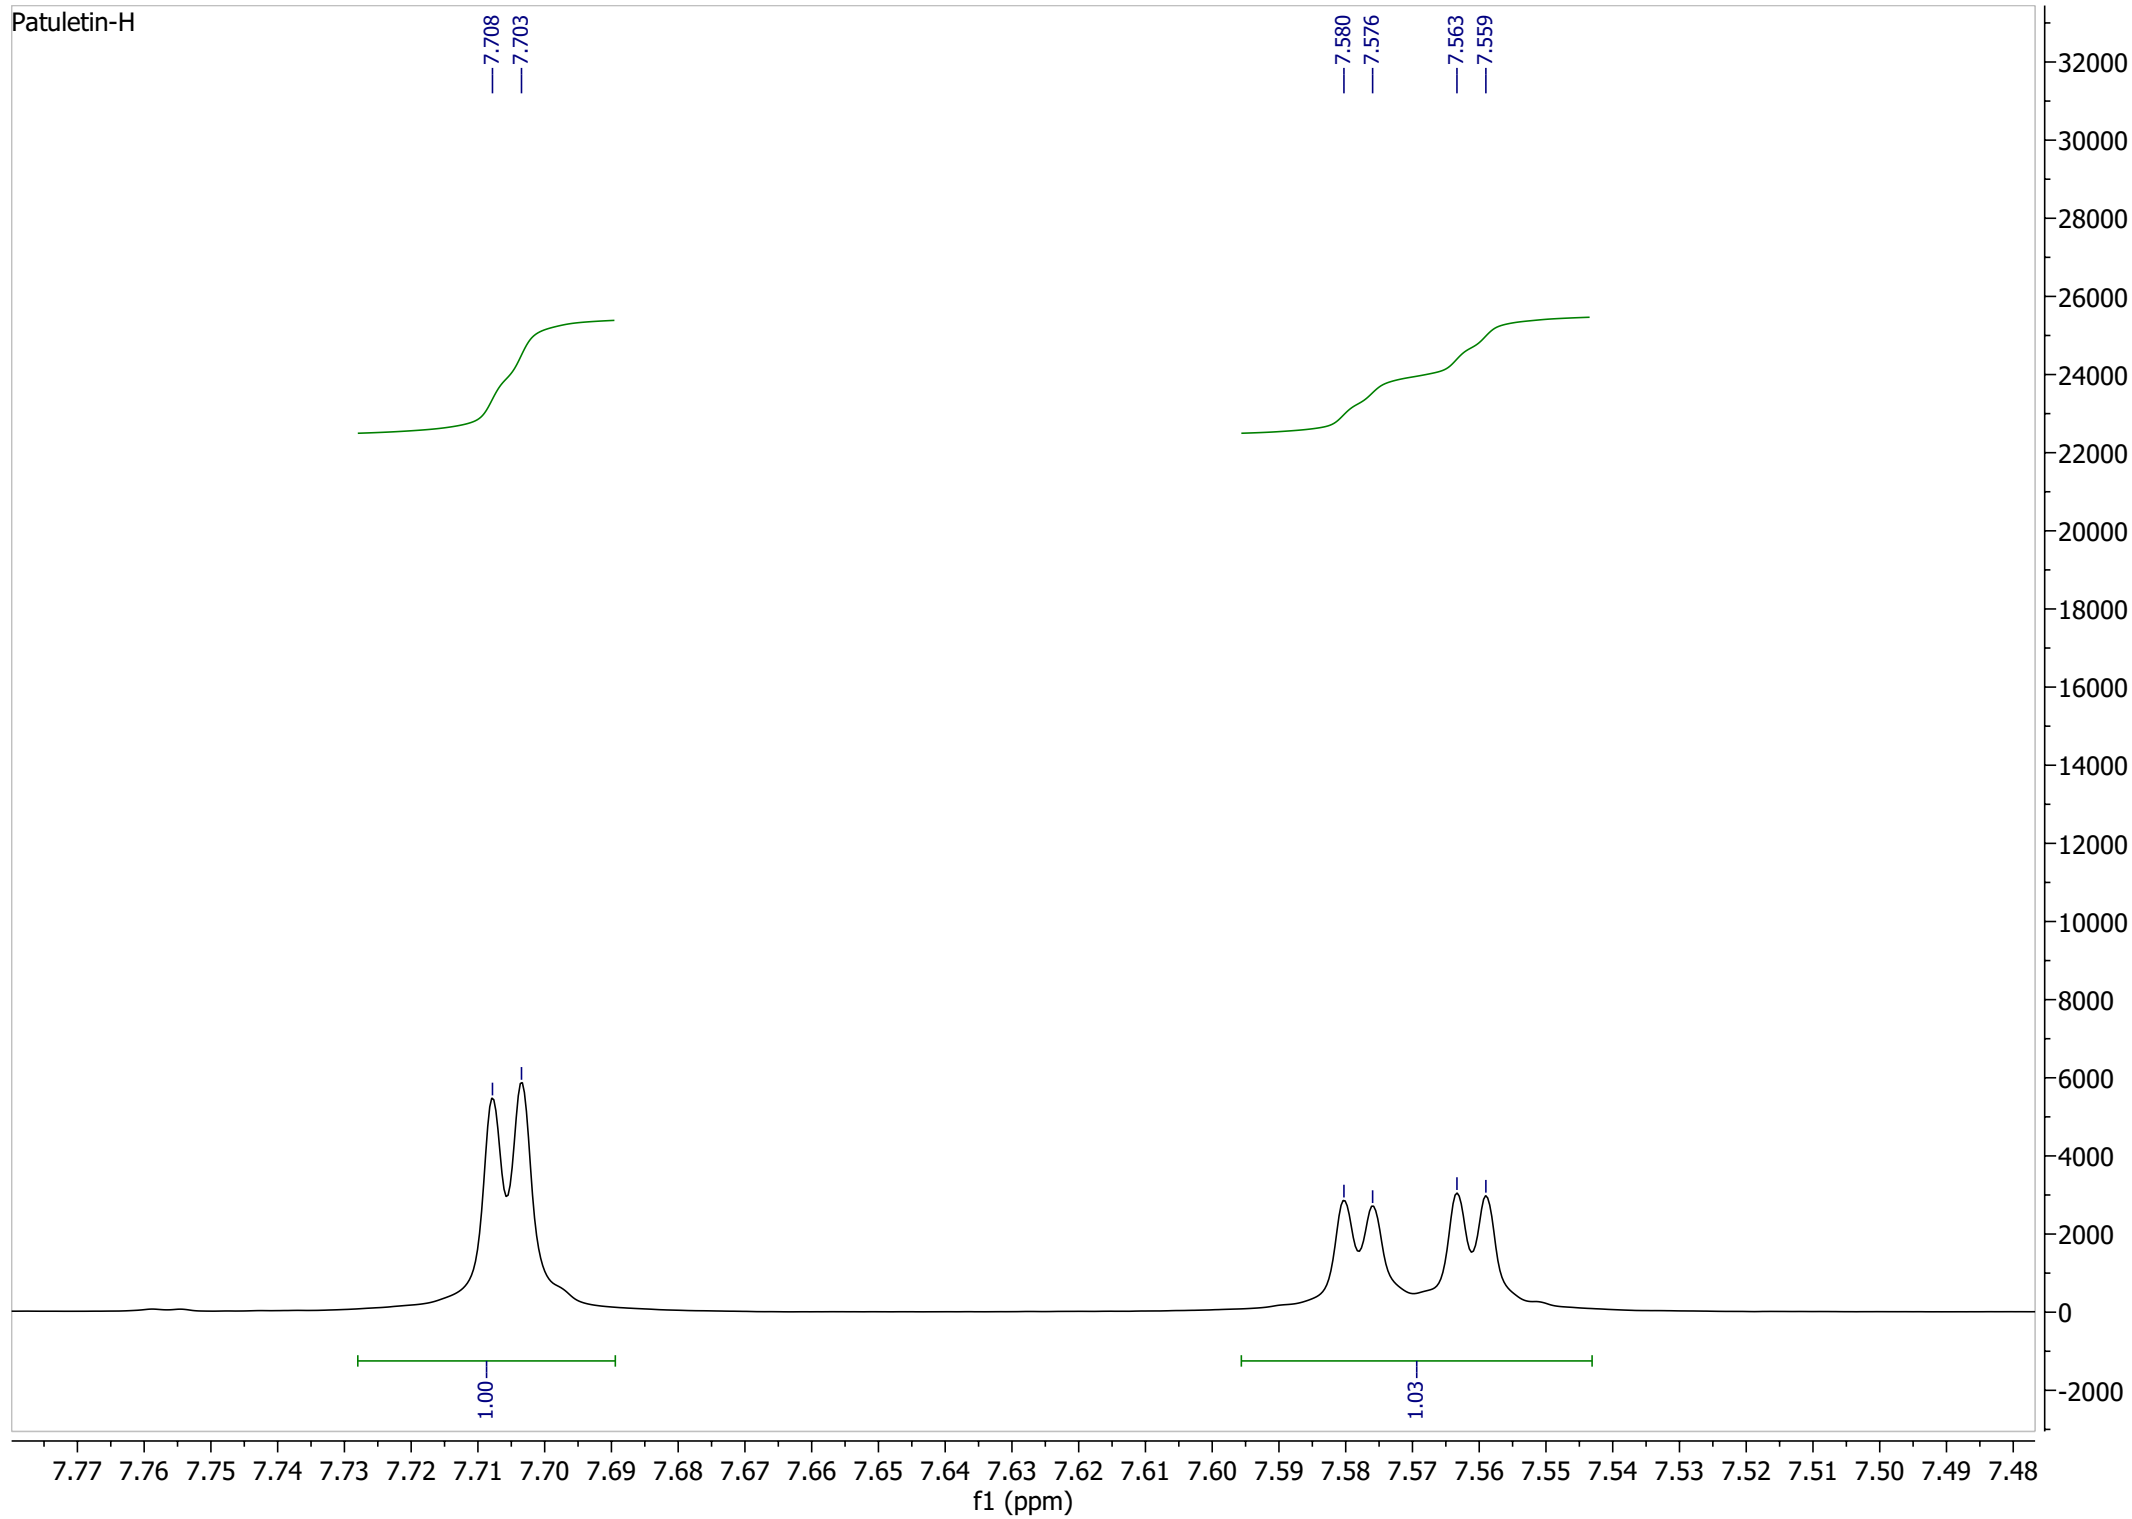

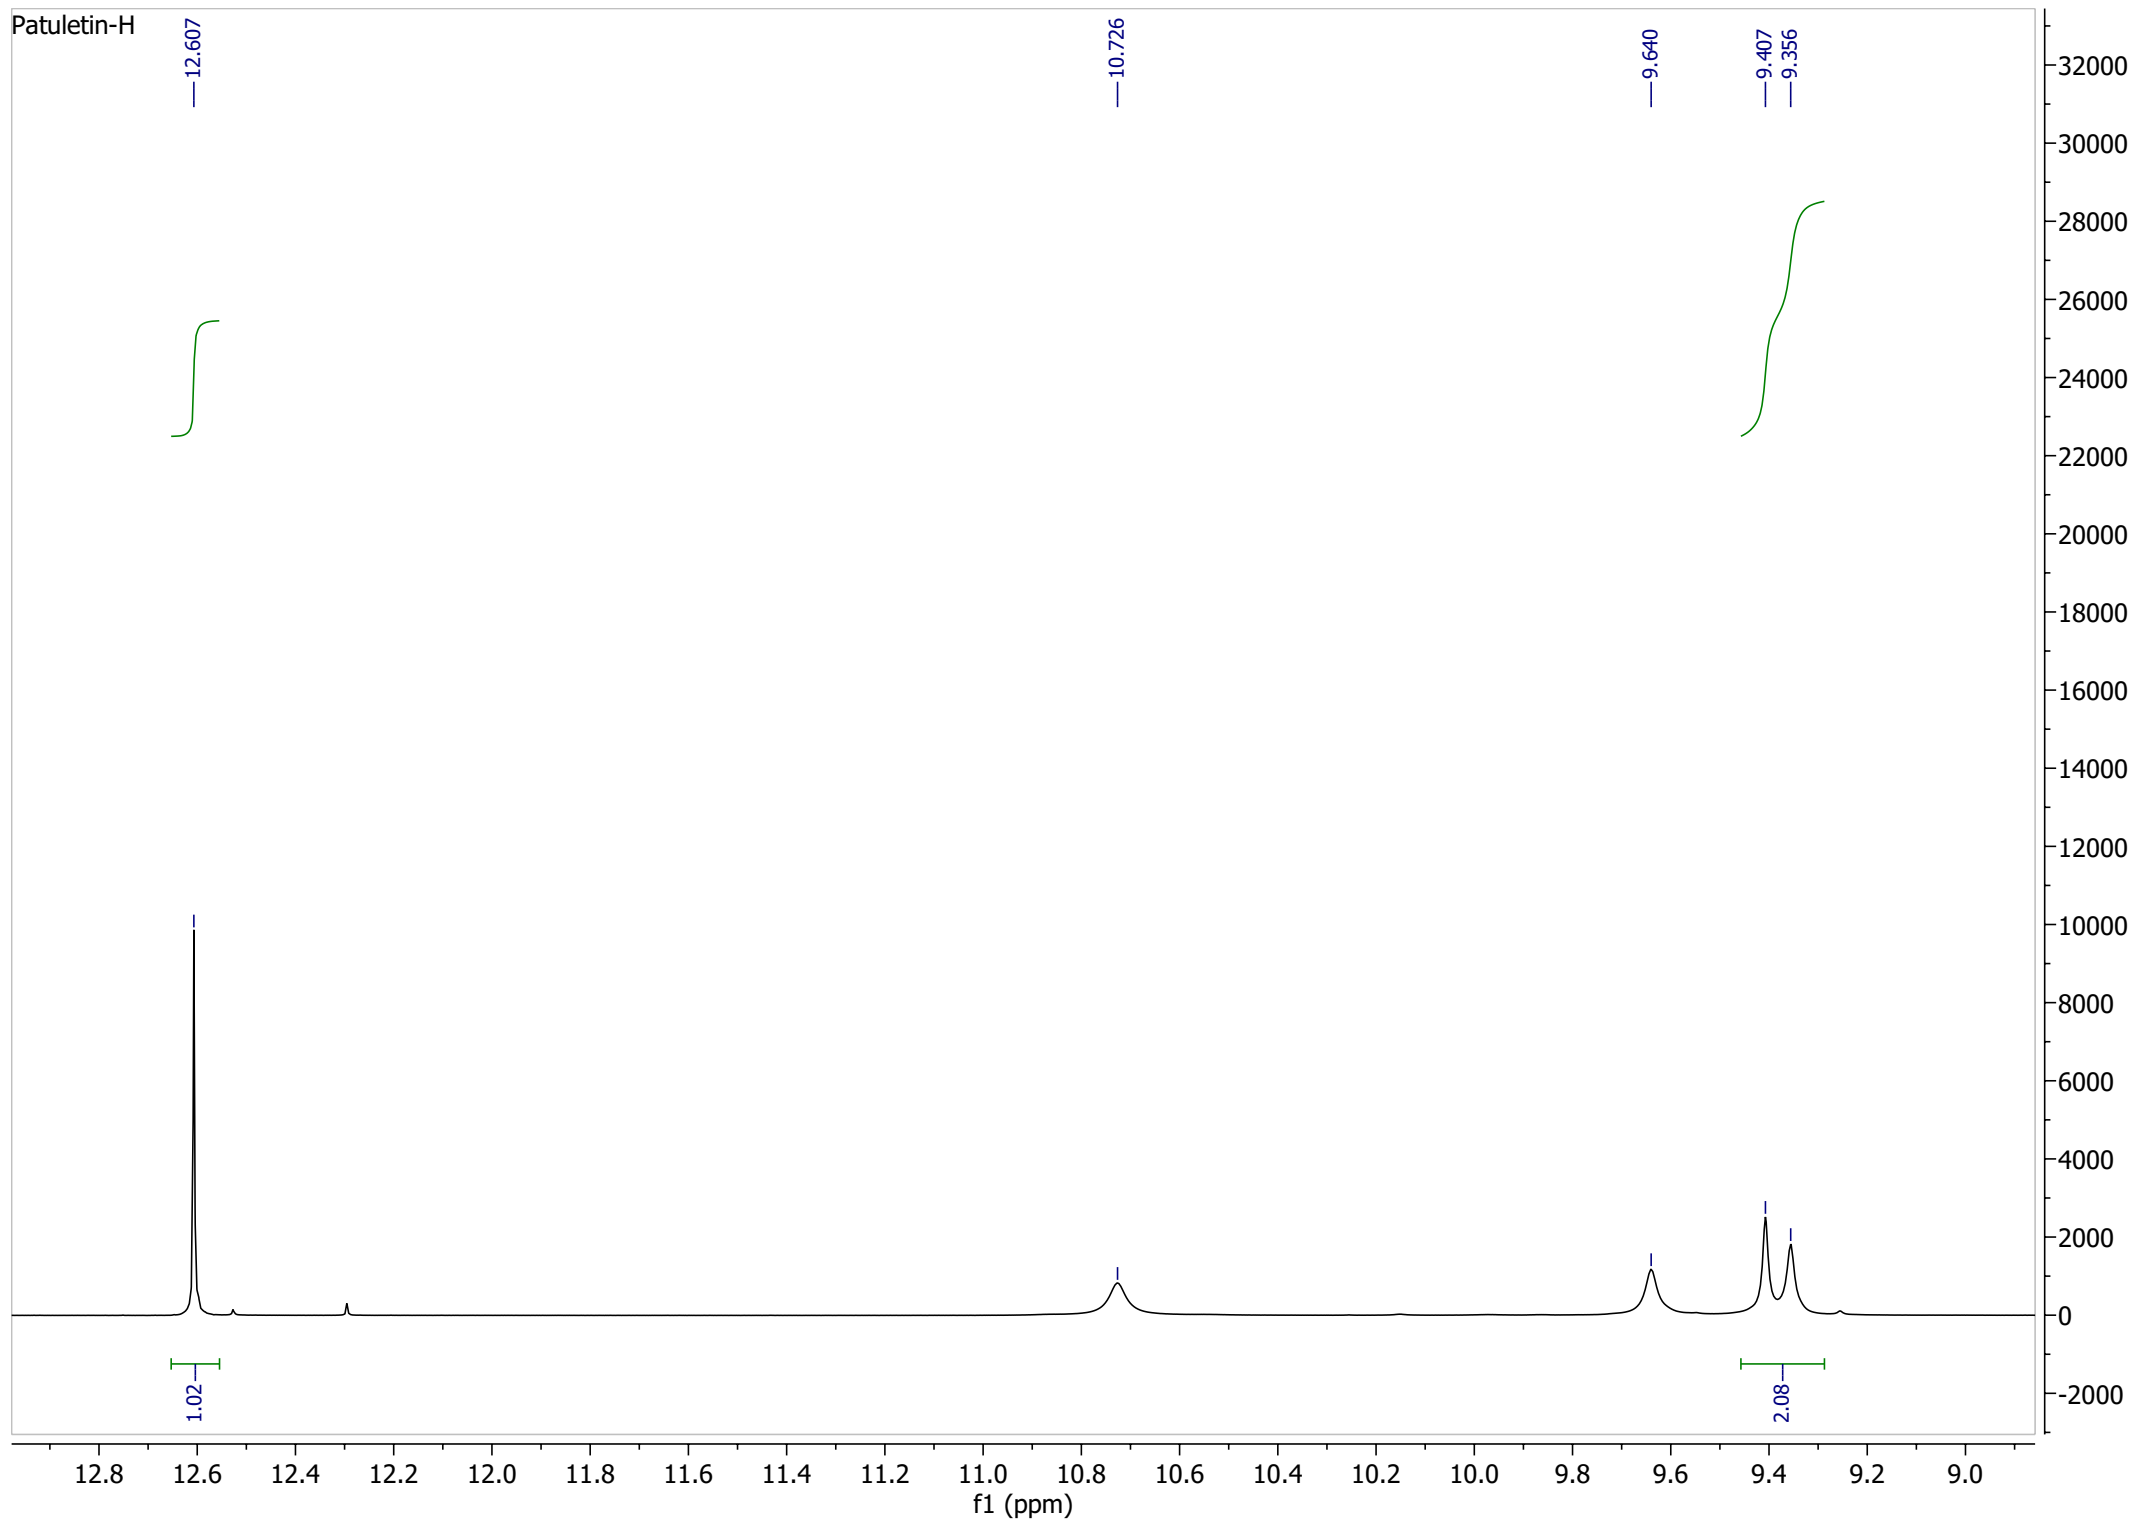



Patuletin-C

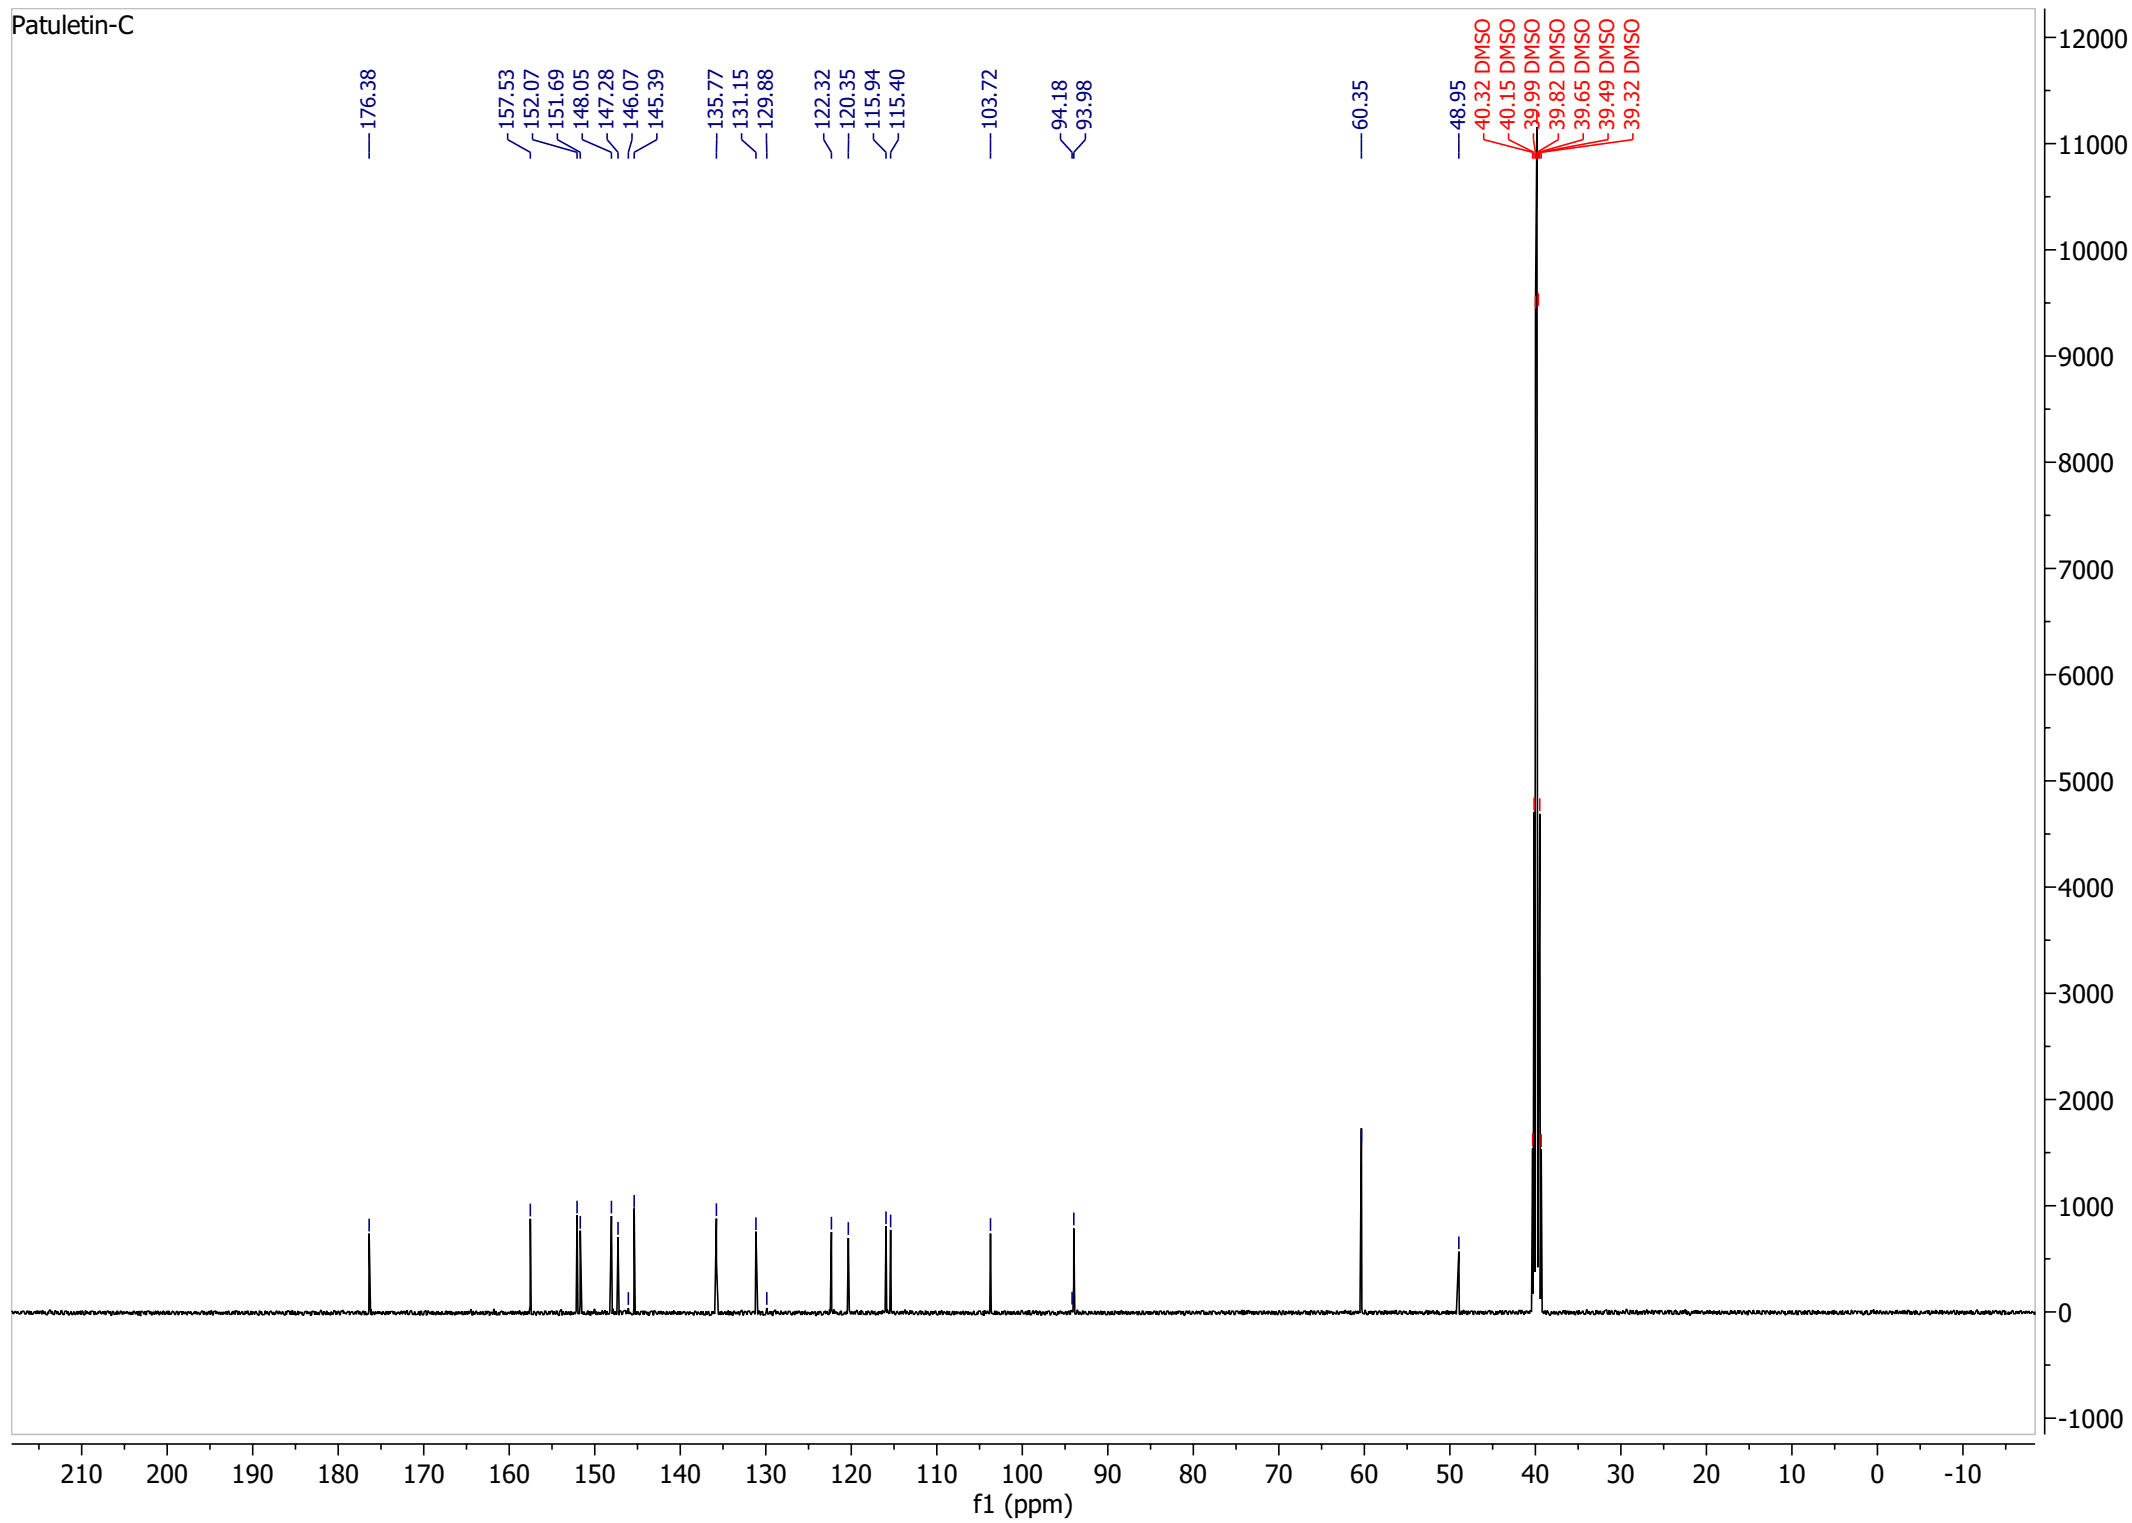



Patuletin-C

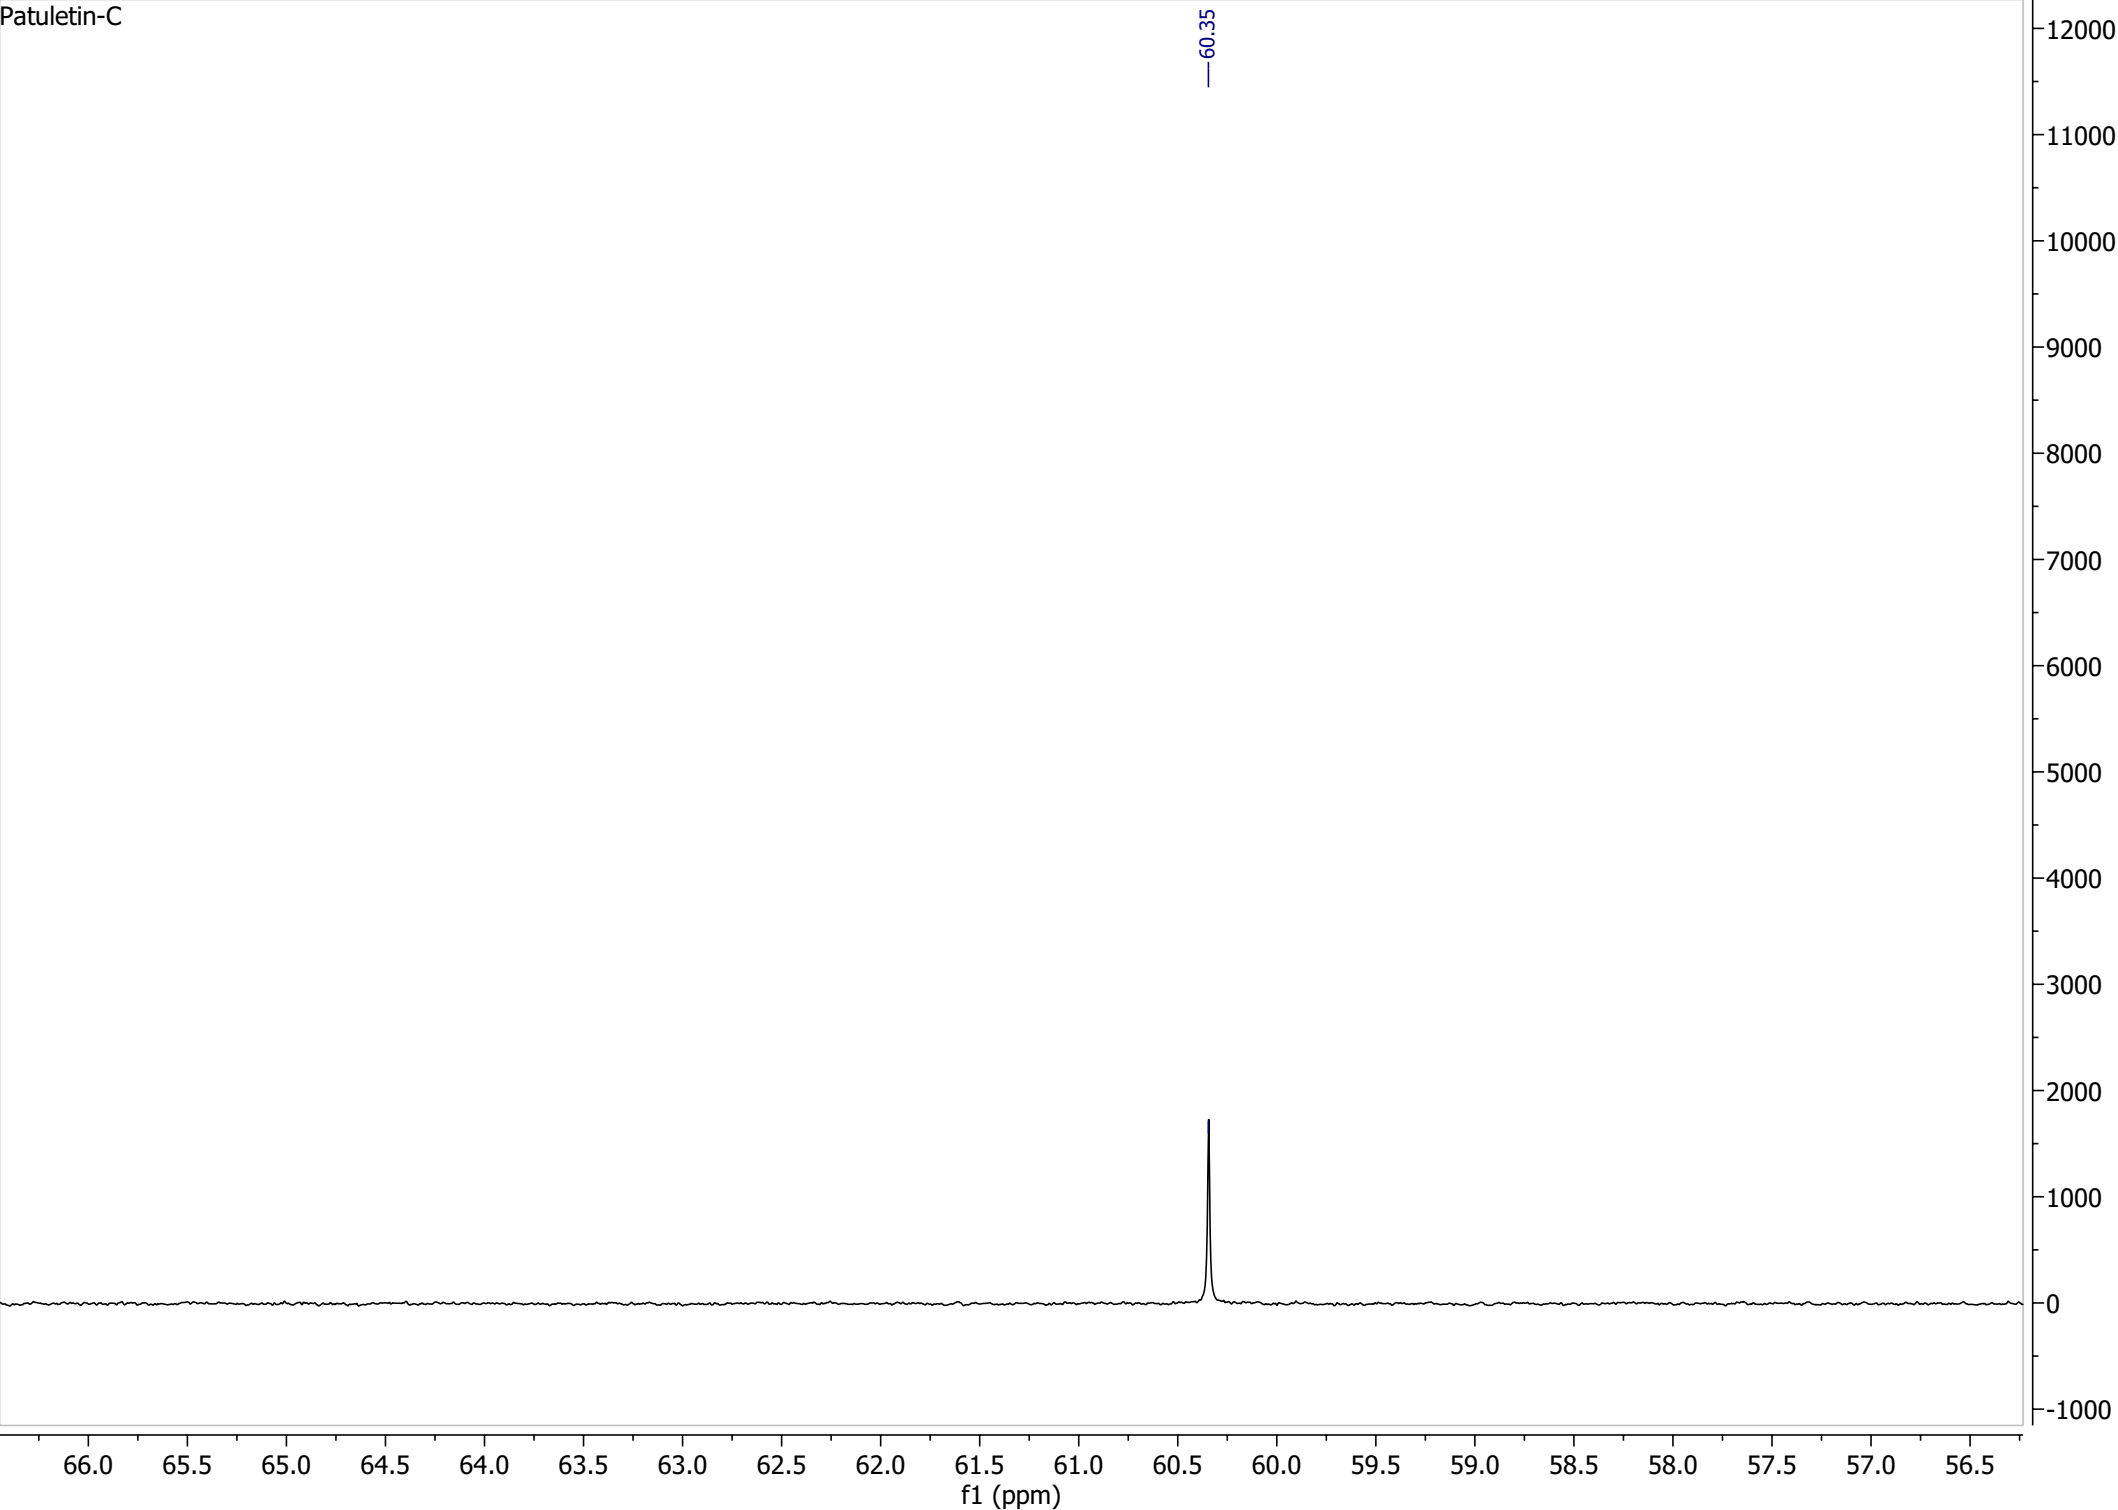



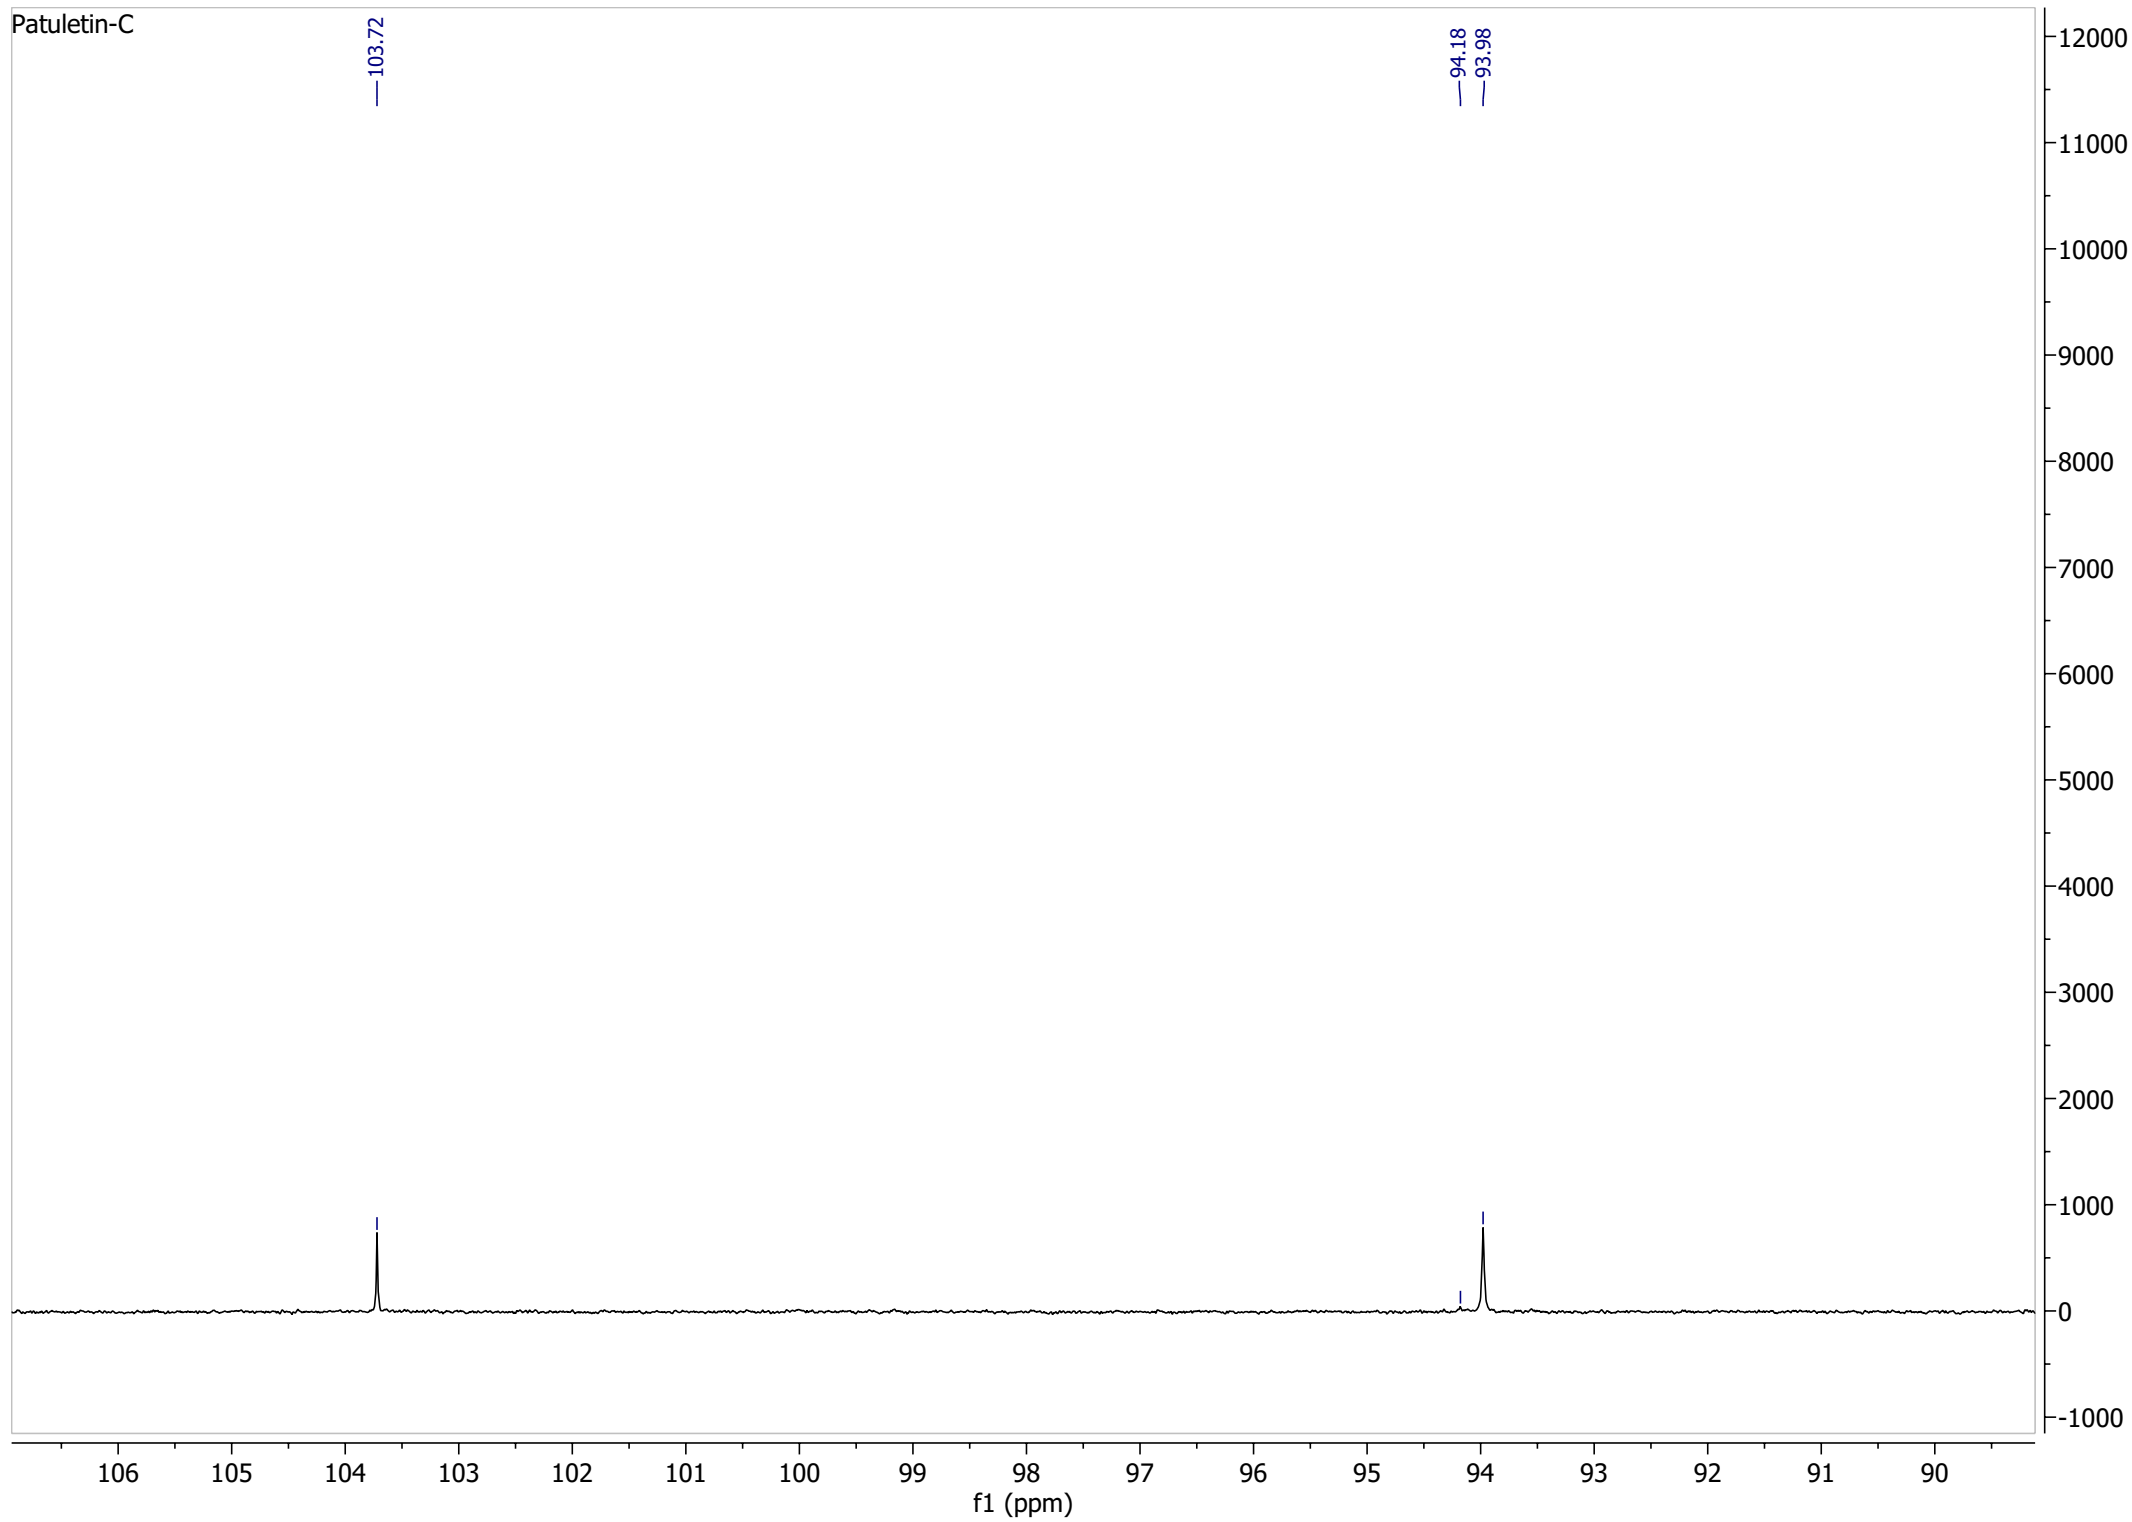

Patuletin-C

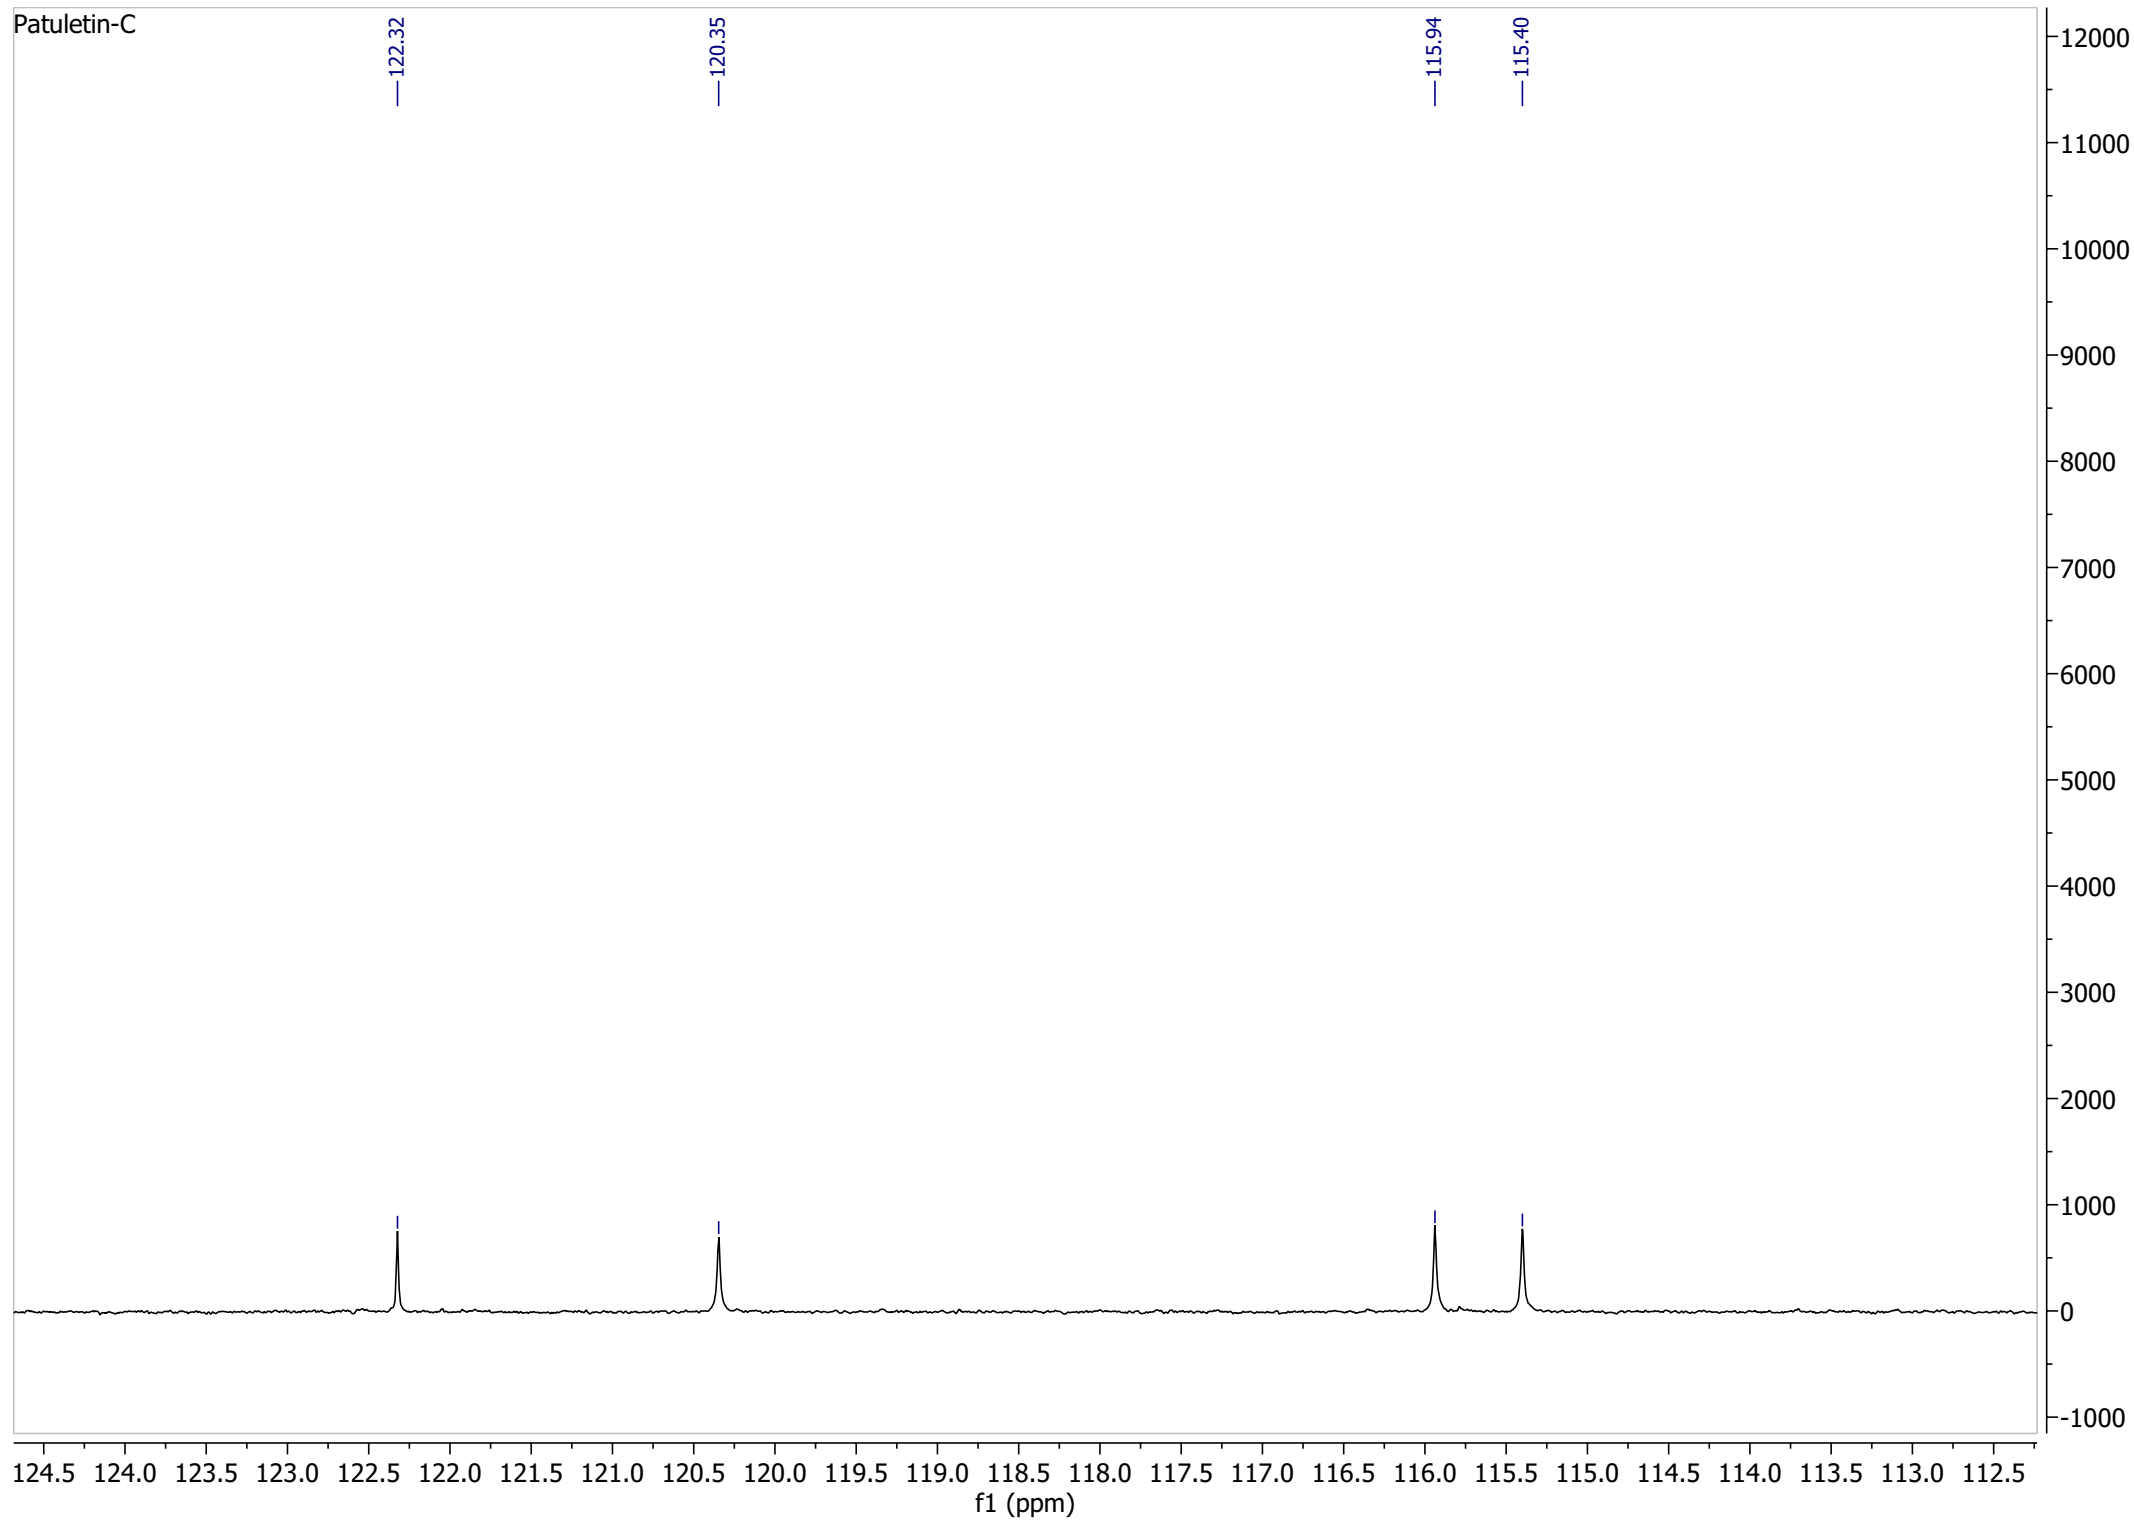

Patuletin-C

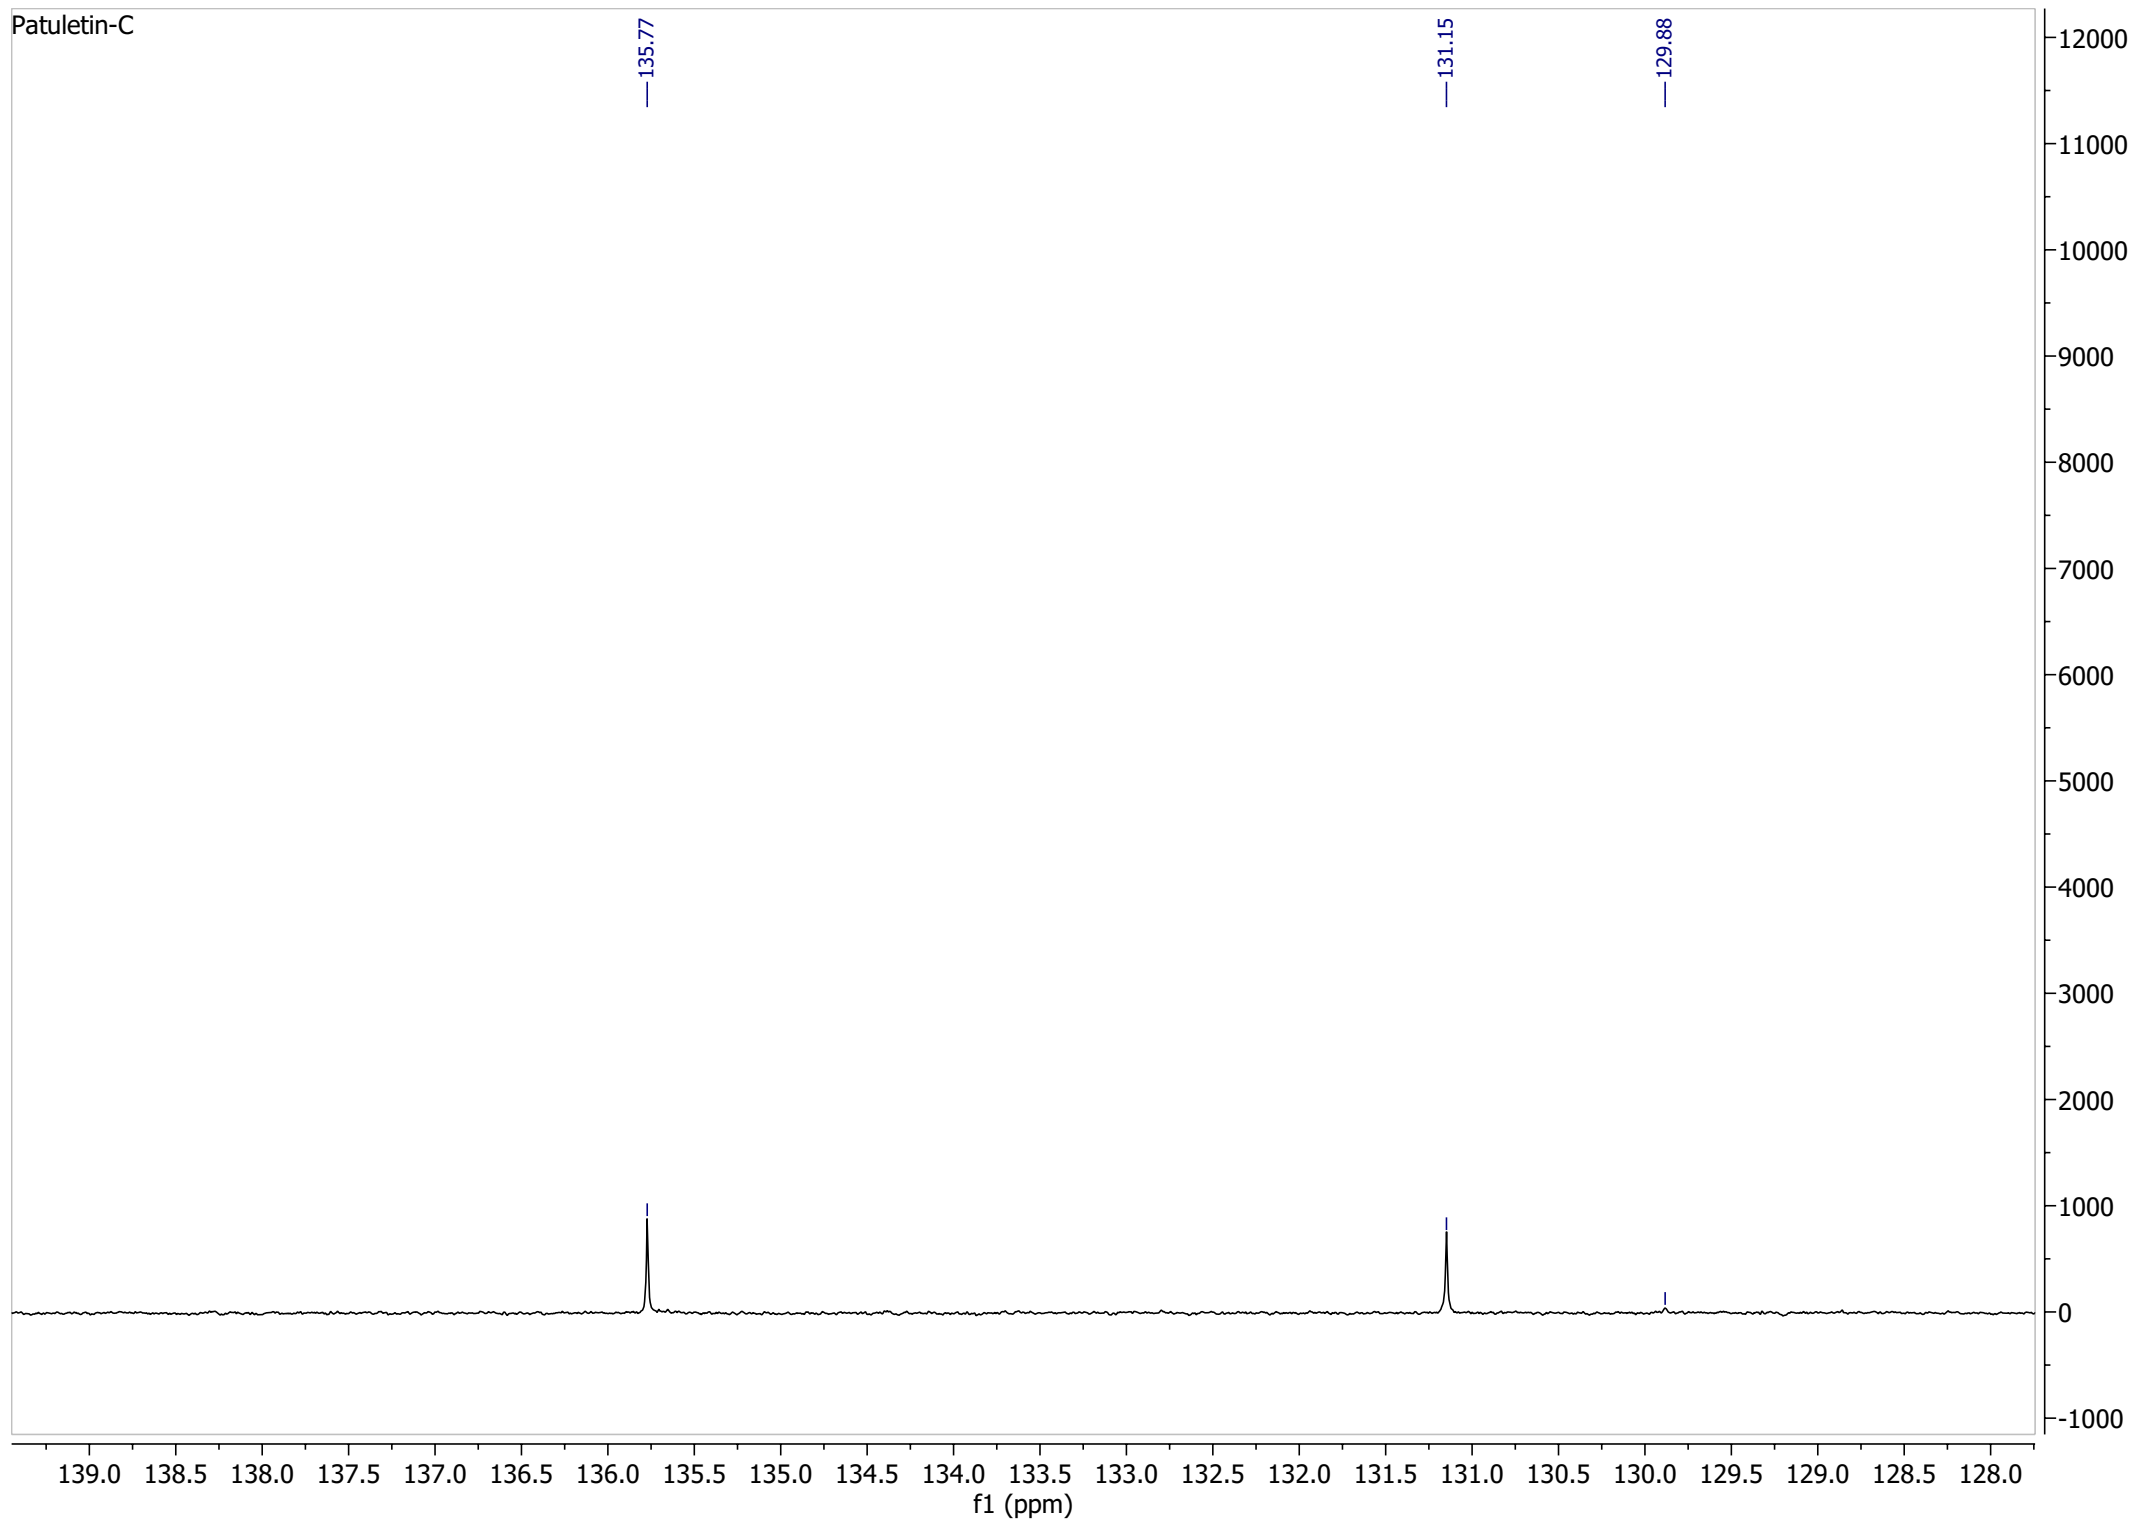

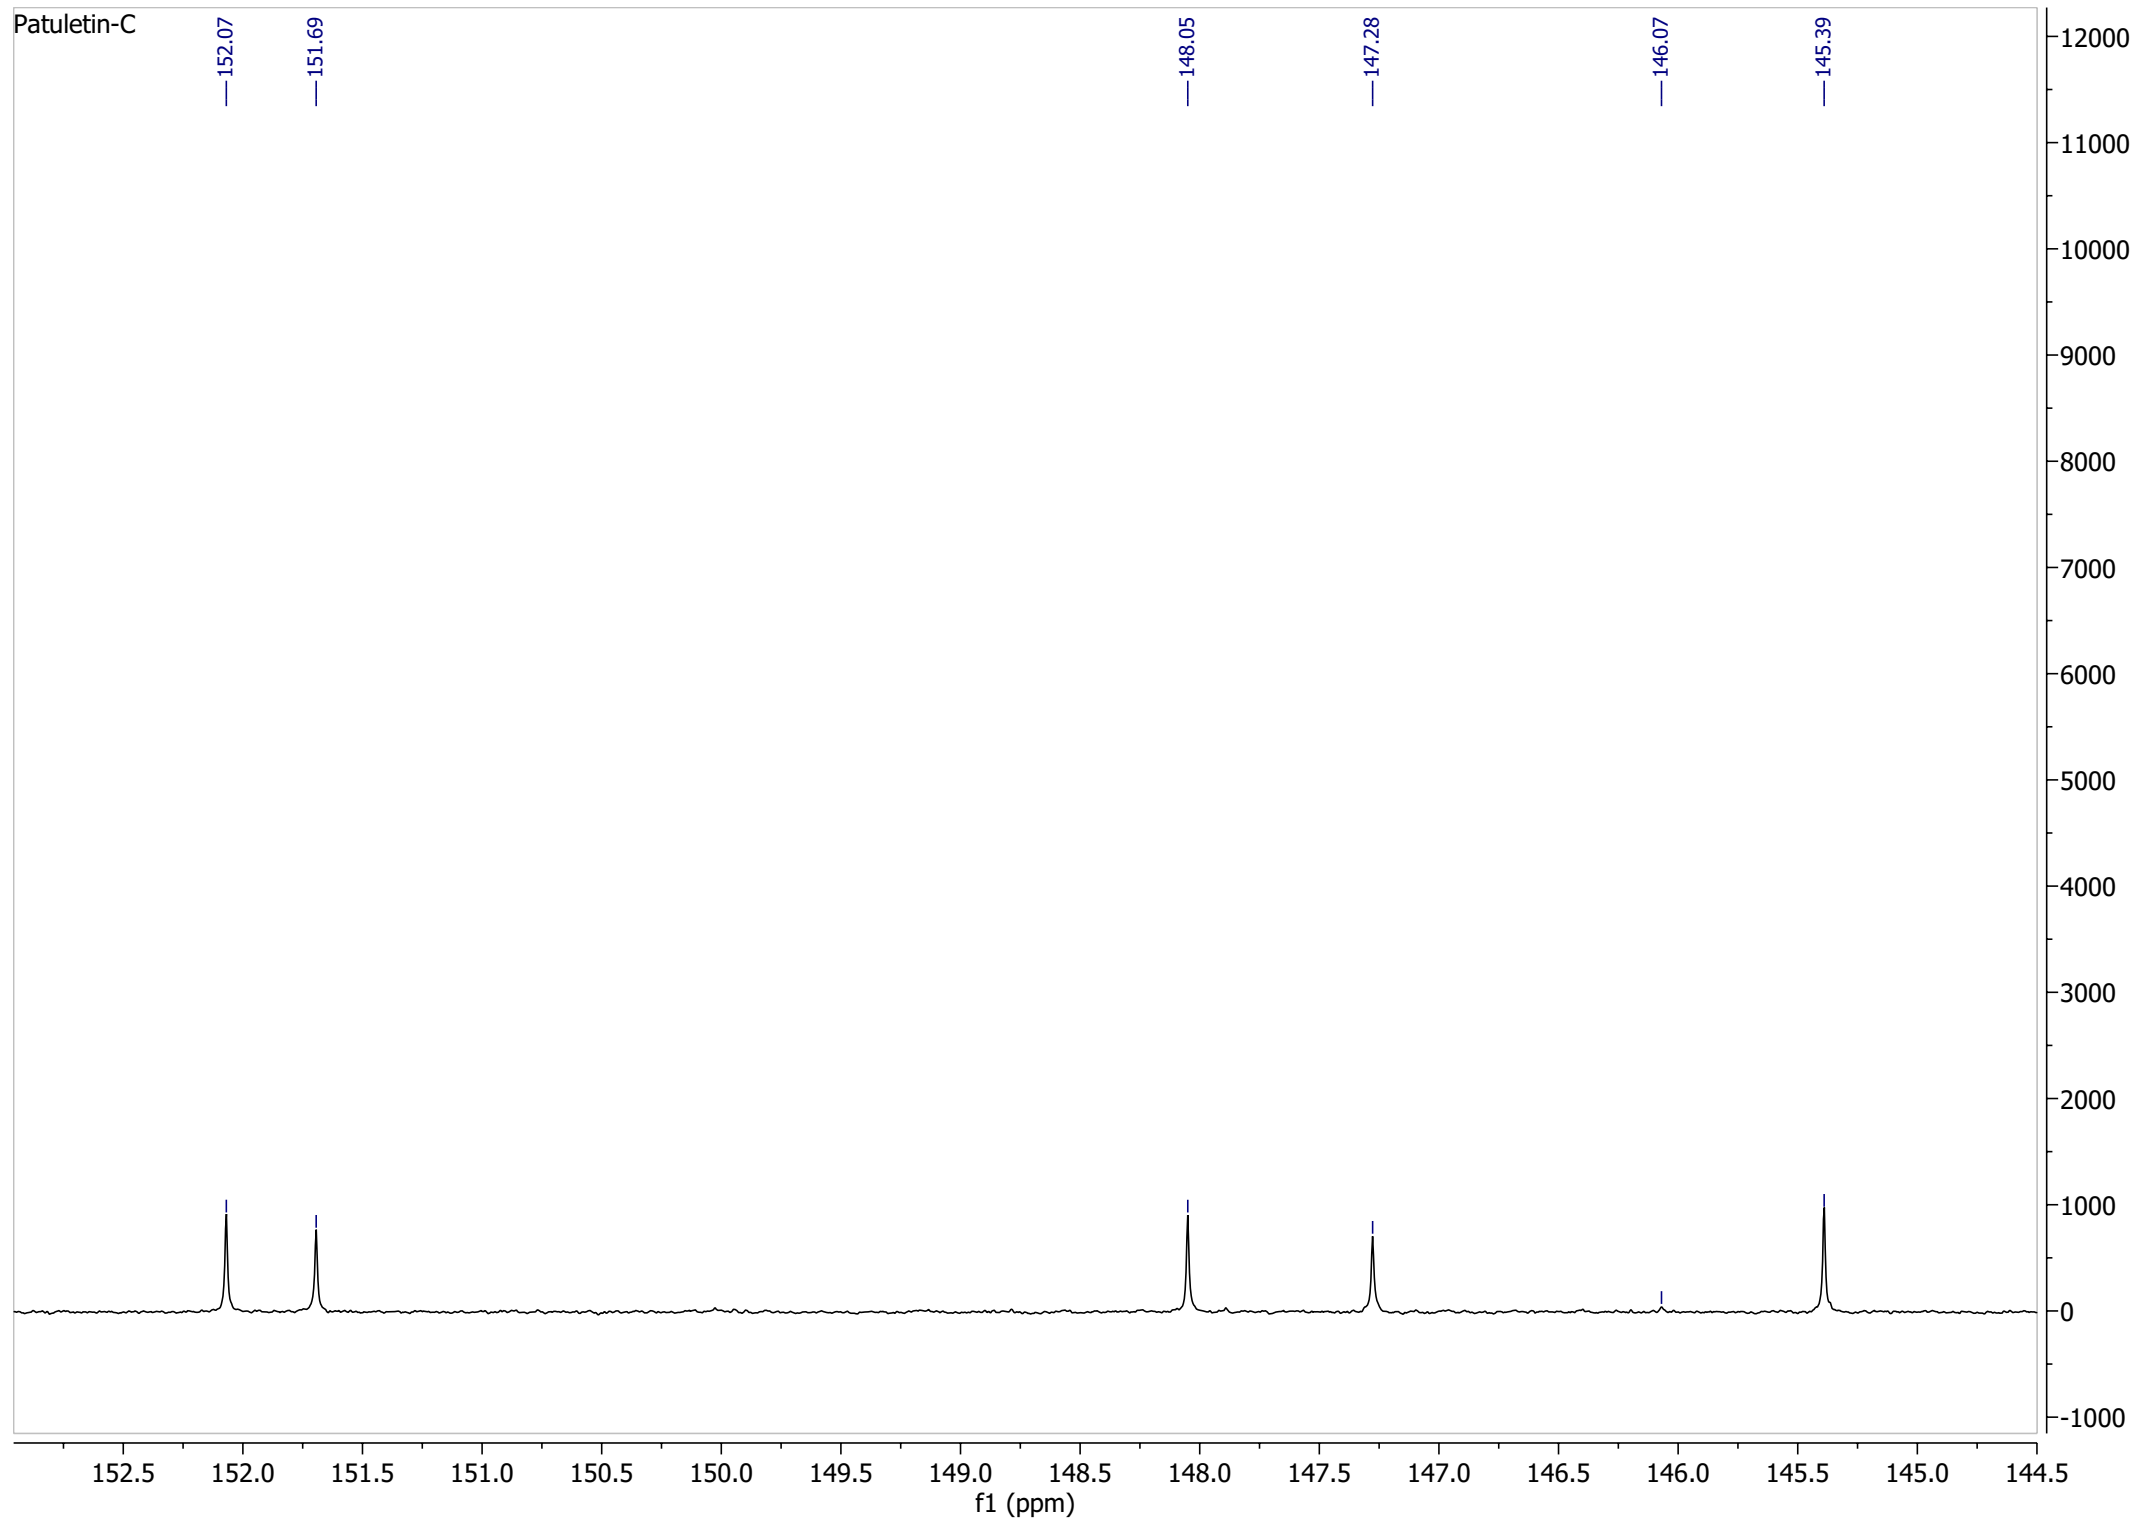

Patuletin-C

—176.38

—157.53

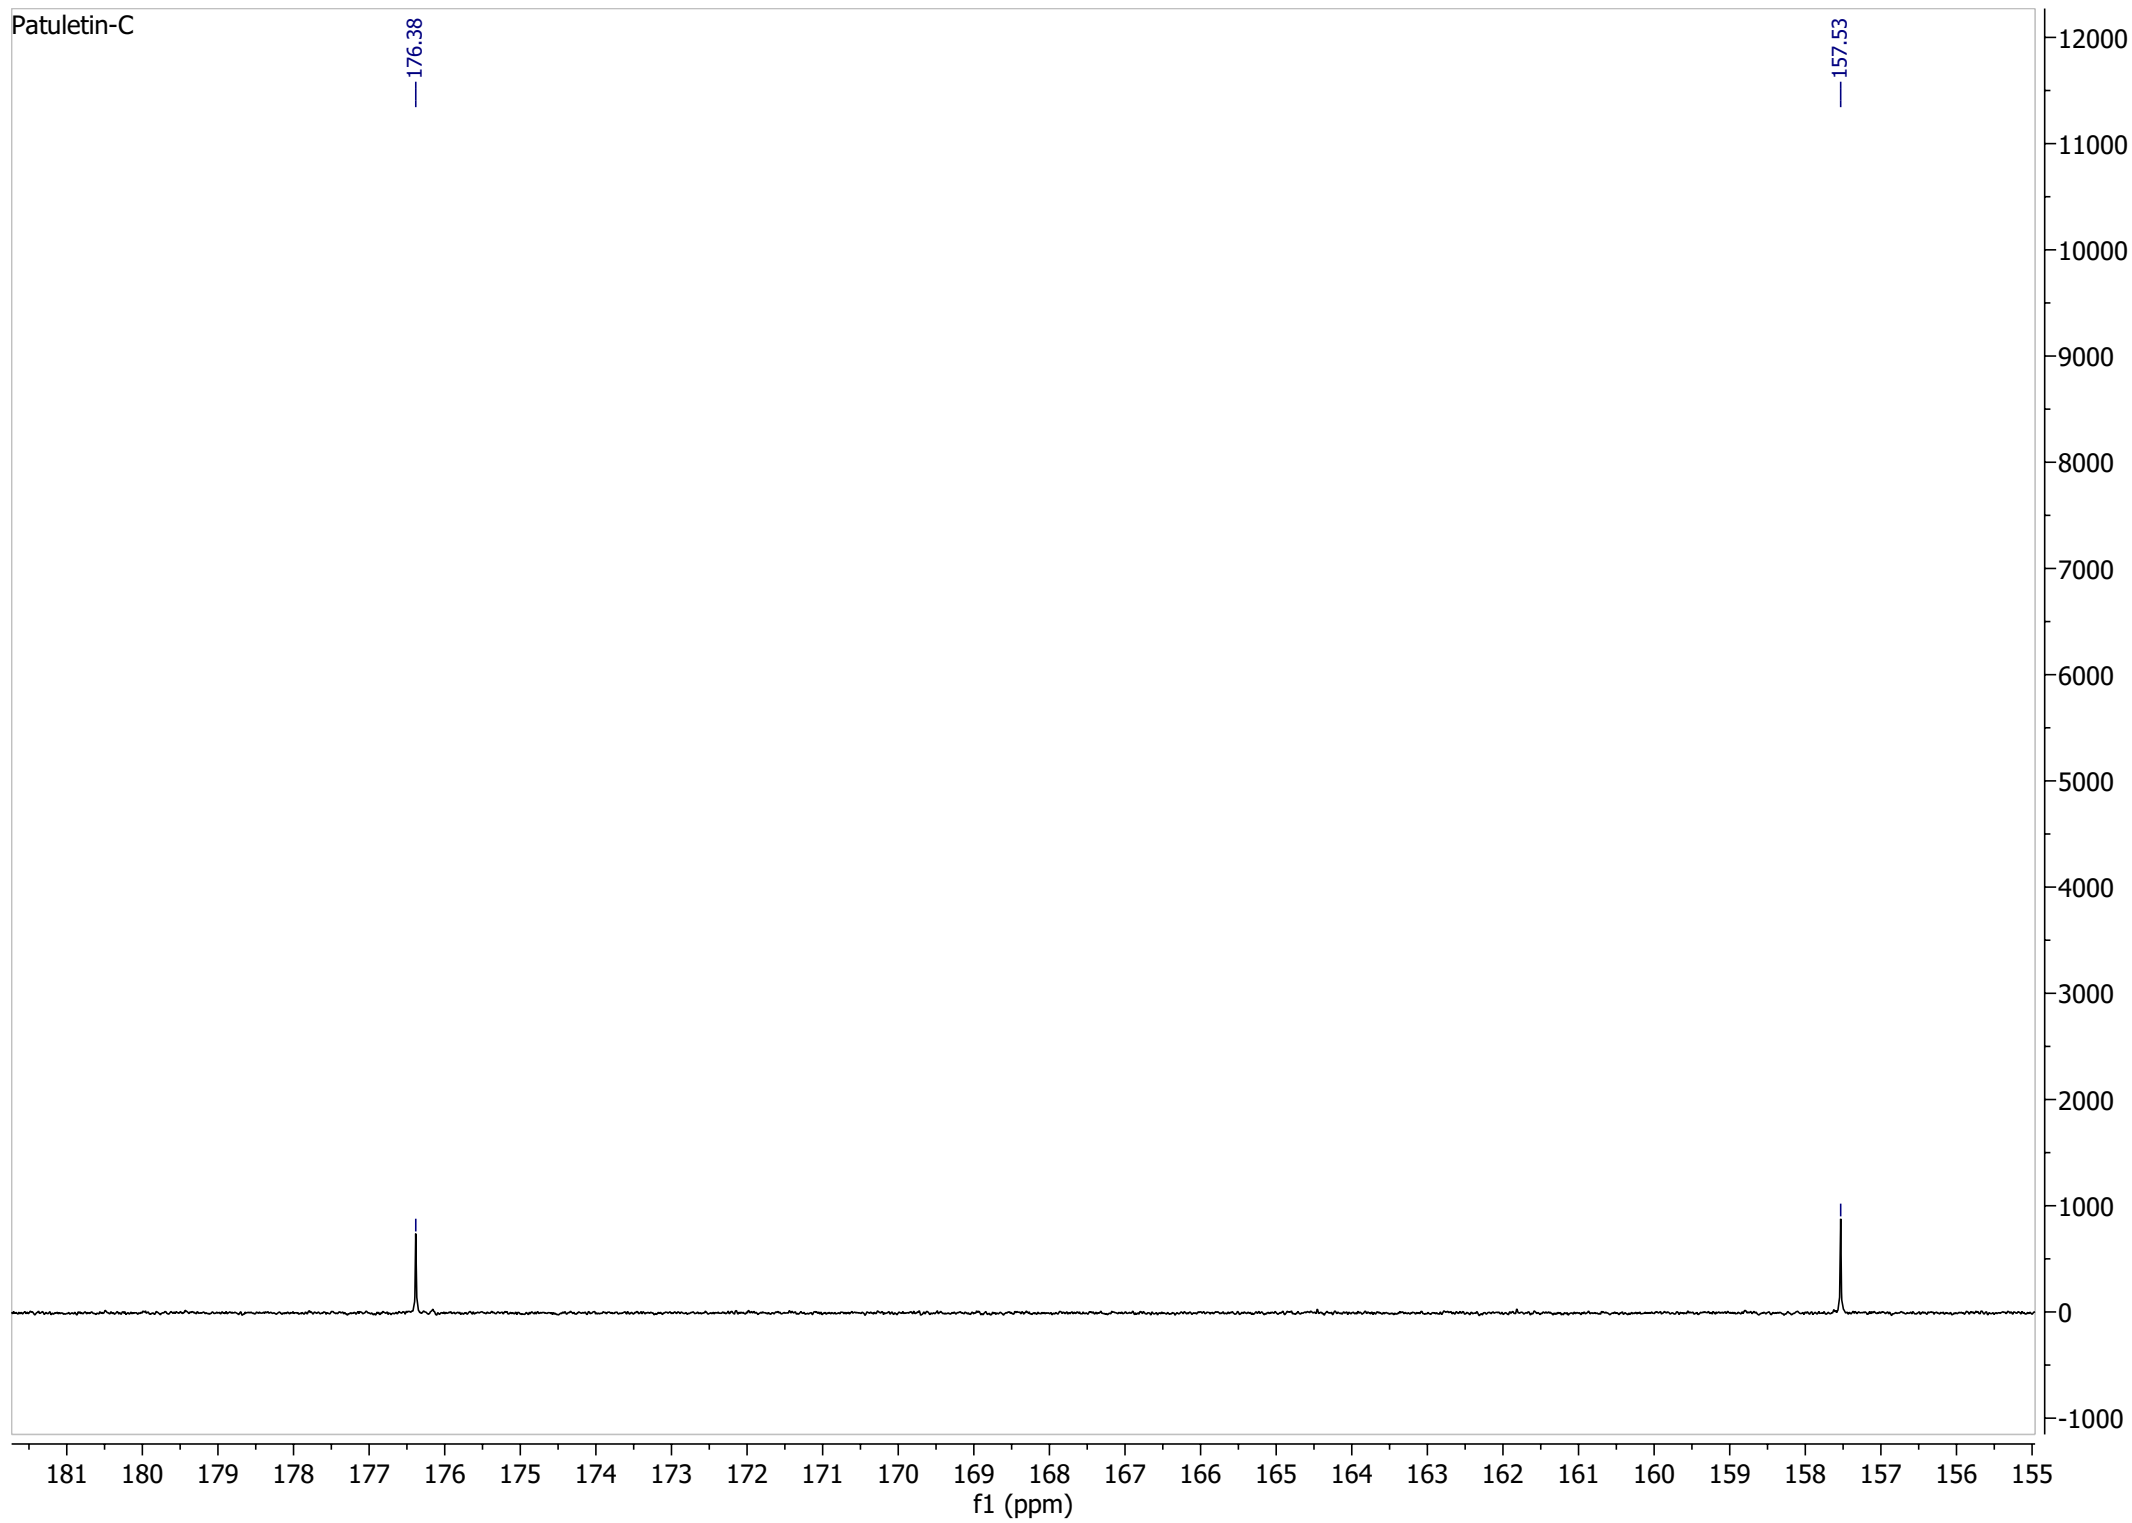

# Toxicity Report

# Patuletin

# TOPKAT\_Mouse\_Female\_FDA\_None\_vs\_Carcinogen

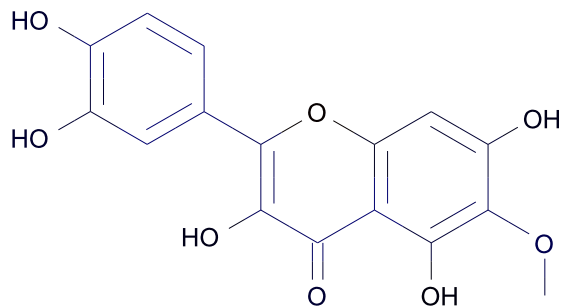

$C_{16}H_{12}O_8$

Molecular Weight: 332.26168

ALogP: 1.614

Rotatable Bonds: 2

Acceptors: 8

Donors: 5

## Model Prediction

Prediction: Non-Carcinogen

Probability: 0.209

Enrichment: 0.651

Bayesian Score: -8.04

Mahalanobis Distance: 14.5

Mahalanobis Distance p-value: 2.3e-006

Prediction: Positive if the Bayesian score is above the estimated best cutoff value from minimizing the false positive and false negative rate.

Probability: The estimated probability that the sample is in the positive category. This assumes that the Bayesian score follows a normal distribution and is different from the prediction using a cutoff.

Enrichment: An estimate of enrichment, that is, the increased likelihood (versus random) of this sample being in the category.

Bayesian Score: The standard Laplacian-modified Bayesian score.

Mahalanobis Distance: The Mahalanobis distance (MD) is the distance to the center of the training data. The larger the MD, the less trustworthy the prediction.

Mahalanobis Distance p-value: The p-value gives the fraction of training data with an MD greater than or equal to the one for the given sample, assuming normally distributed data. The smaller the p-value, the less trustworthy the prediction. For highly non-normal X properties (e.g., fingerprints), the MD p-value is wildly inaccurate.

## Structural Similar Compounds

| Name               | Olsalazine                                                          | Minocycline                                                         | Tetracycline                                                        |
|--------------------|---------------------------------------------------------------------|---------------------------------------------------------------------|---------------------------------------------------------------------|
| Structure          |                                                                     |                                                                     |                                                                     |
| Actual Endpoint    | Non-Carcinogen                                                      | Non-Carcinogen                                                      | Non-Carcinogen                                                      |
| Predicted Endpoint | Carcinogen                                                          | Non-Carcinogen                                                      | Non-Carcinogen                                                      |
| Distance           | 0.677                                                               | 0.749                                                               | 0.798                                                               |
| Reference          | US FDA (Centre for Drug Eval.& Res./Off. Testing & Res.) Sept. 1997 | US FDA (Centre for Drug Eval.& Res./Off. Testing & Res.) Sept. 1997 | US FDA (Centre for Drug Eval.& Res./Off. Testing & Res.) Sept. 1997 |

## Model Applicability

Unknown features are fingerprint features in the query molecule, but not found or appearing too infrequently in the training set.

- All properties and OPS components are within expected ranges.
- Unknown ECFP\_2 feature: 1796421070: [\*]OC(=C([\*])[\*])[c]([\*]):[\*]

## Feature Contribution

### Top features for positive contribution

| Fingerprint | Bit/Smiles | Feature Structure            | Score | Carcinogen in training set |
|-------------|------------|------------------------------|-------|----------------------------|
| ECFP_6      | 2106656448 | <br><chem>[*]C(=O)[*]</chem> | 0.254 | 31 out of 77               |

|                                        |            |                                                                                                                                                   |        |                            |
|----------------------------------------|------------|---------------------------------------------------------------------------------------------------------------------------------------------------|--------|----------------------------|
| ECFP_6                                 | -560785749 | 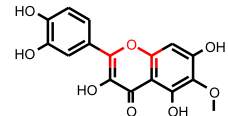<br><chem>[*]C(=[*])O[c](:[*]):[*]</chem>                      | 0.212  | 1 out of 2                 |
| ECFP_6                                 | 683445015  | <br><chem>[*]O[*]</chem>                                       | 0.181  | 18 out of 48               |
| Top Features for negative contribution |            |                                                                                                                                                   |        |                            |
| Fingerprint                            | Bit/Smiles | Feature Structure                                                                                                                                 | Score  | Carcinogen in training set |
| ECFP_6                                 | 1717462980 | <br><chem>[*]C(=[*])C(=O)[c](:[*]):[*]</chem>                  | -1.25  | 0 out of 8                 |
| ECFP_6                                 | -219423964 | <br><chem>[*]C(=[*])[c]1:[cH]:[*]:[c]([*]):[cH]:[cH]:1</chem> | -0.935 | 0 out of 5                 |
| ECFP_6                                 | 1307307440 | <br><chem>[*]:[c](:[*])OC</chem>                             | -0.558 | 4 out of 25                |



# Remdesivir

# TOPKAT\_Mouse\_Female\_FDA\_None\_vs\_Carcinogen

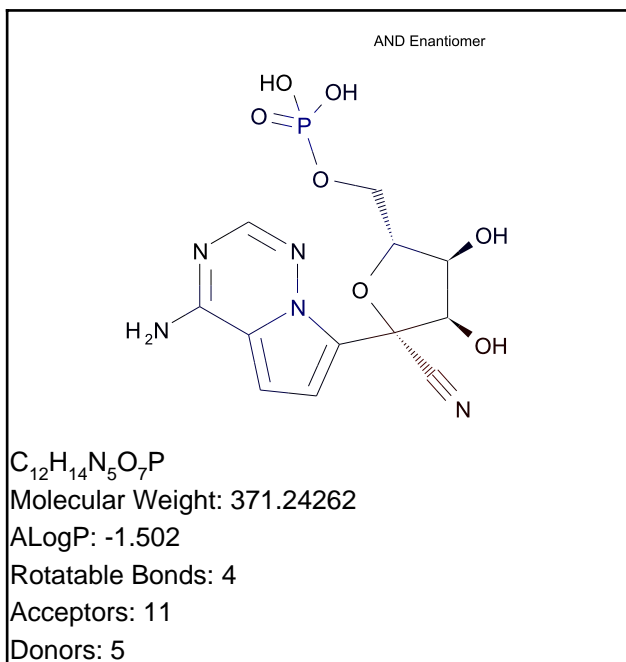

## Model Prediction

Prediction: Non-Carcinogen

Probability: 0.206

Enrichment: 0.642

Bayesian Score: -7.17

Mahalanobis Distance: 12.9

Mahalanobis Distance p-value: 0.00074

Prediction: Positive if the Bayesian score is above the estimated best cutoff value from minimizing the false positive and false negative rate.

Probability: The estimated probability that the sample is in the positive category. This assumes that the Bayesian score follows a normal distribution and is different from the prediction using a cutoff.

Enrichment: An estimate of enrichment, that is, the increased likelihood (versus random) of this sample being in the category.

Bayesian Score: The standard Laplacian-modified Bayesian score.

Mahalanobis Distance: The Mahalanobis distance (MD) is the distance to the center of the training data. The larger the MD, the less trustworthy the prediction.

Mahalanobis Distance p-value: The p-value gives the fraction of training data with an MD greater than or equal to the one for the given sample, assuming normally distributed data. The smaller the p-value, the less trustworthy the prediction. For highly non-normal X properties (e.g., fingerprints), the MD p-value is wildly inaccurate.

## Structural Similar Compounds

| Name               | Famotidine                                                                          | Tetracycline                                                                        | Oxytetracycline                                                                     |
|--------------------|-------------------------------------------------------------------------------------|-------------------------------------------------------------------------------------|-------------------------------------------------------------------------------------|
| Structure          | 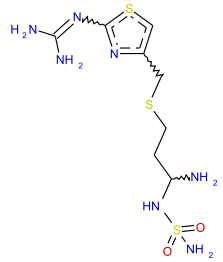 |  |  |
| Actual Endpoint    | Non-Carcinogen                                                                      | Non-Carcinogen                                                                      | Non-Carcinogen                                                                      |
| Predicted Endpoint | Non-Carcinogen                                                                      | Non-Carcinogen                                                                      | Non-Carcinogen                                                                      |
| Distance           | 0.846                                                                               | 0.848                                                                               | 0.870                                                                               |
| Reference          | US FDA (Centre for Drug Eval.& Res./Off. Testing & Res.) Sept. 1997                 | US FDA (Centre for Drug Eval.& Res./Off. Testing & Res.) Sept. 1997                 | US FDA (Centre for Drug Eval.& Res./Off. Testing & Res.) Sept. 1997                 |

## Model Applicability

Unknown features are fingerprint features in the query molecule, but not found or appearing too infrequently in the training set.

1. All properties and OPS components are within expected ranges.
2. Unknown ECFP\_2 feature: 1126642748: [\*]OP(=O)(O)O
3. Unknown ECFP\_2 feature: -1250439909: [\*]COP(=[\*])([\*])[\*]
4. Unknown ECFP\_2 feature: 1258791451: [\*][C@@H]1[\*][\*]O[C@]1(C#[\*])[c]([\*]):[\*]
5. Unknown ECFP\_2 feature: -1507082173: [\*][c]1[\*]:[\*]:[c]([\*]):n:1:n:[\*]
6. Unknown ECFP\_2 feature: -66263742: [\*]C([\*])([\*])[c]1:n([\*]):[\*]:[\*]:c:1

## Feature Contribution

### Top features for positive contribution

| Fingerprint | Bit/Smiles | Feature Structure | Score | Carcinogen in training set |
|-------------|------------|-------------------|-------|----------------------------|
|             |            |                   |       |                            |

|                                        |             |                                                                                                                                                                |        |                            |
|----------------------------------------|-------------|----------------------------------------------------------------------------------------------------------------------------------------------------------------|--------|----------------------------|
| ECFP_6                                 | -1114776580 | <p>AND Enantiomer</p> 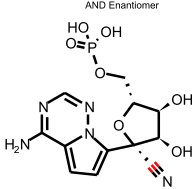 <p>[*]C#[*]</p>                                      | 0.755  | 11 out of 15               |
| ECFP_6                                 | -521596699  | <p>AND Enantiomer</p>  <p>[*][C@@H]1[*][*]C([*])<br/>)([*])[C@@H]1O</p>     | 0.451  | 3 out of 5                 |
| ECFP_6                                 | -264833661  | <p>AND Enantiomer</p>  <p>[*]C([*])([*])C#N</p>                             | 0.424  | 1 out of 1                 |
| Top Features for negative contribution |             |                                                                                                                                                                |        |                            |
| Fingerprint                            | Bit/Smiles  | Feature Structure                                                                                                                                              | Score  | Carcinogen in training set |
| ECFP_6                                 | 1334415134  | <p>AND Enantiomer</p>  <p>[*][c](:[*]):[c]1:[cH]<br/>]:[*]:[*]:n:1:[*]</p> | -0.935 | 0 out of 5                 |
| ECFP_6                                 | 2100964382  | <p>AND Enantiomer</p>  <p>[*]P(=O)([*])[*]</p>                            | -0.935 | 0 out of 5                 |

|        |            |                                                                                                                                        |        |            |
|--------|------------|----------------------------------------------------------------------------------------------------------------------------------------|--------|------------|
| ECFP_6 | -826638028 | <p>AND Enantiomer</p> 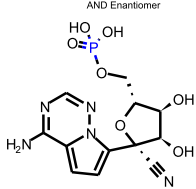 <p>[*]P(=O)([O])([O])[O]</p> | -0.935 | 0 out of 5 |
|--------|------------|----------------------------------------------------------------------------------------------------------------------------------------|--------|------------|

# Patuletin

# TOPKAT\_Mouse\_Male\_FDA\_None\_vs\_Carcinogen

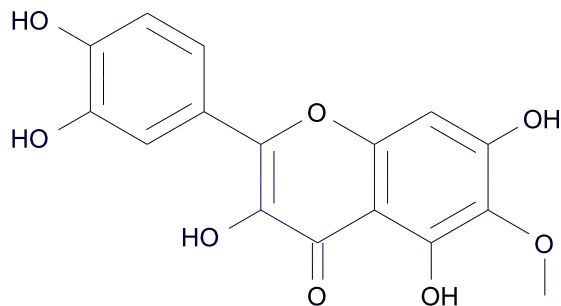

C<sub>16</sub>H<sub>12</sub>O<sub>8</sub>

Molecular Weight: 332.26168

ALogP: 1.614

Rotatable Bonds: 2

Acceptors: 8

Donors: 5

## Model Prediction

Prediction: Non-Carcinogen

Probability: 0.166

Enrichment: 0.565

Bayesian Score: -7.44

Mahalanobis Distance: 14.5

Mahalanobis Distance p-value: 9.1e-007

Prediction: Positive if the Bayesian score is above the estimated best cutoff value from minimizing the false positive and false negative rate.

Probability: The estimated probability that the sample is in the positive category. This assumes that the Bayesian score follows a normal distribution and is different from the prediction using a cutoff.

Enrichment: An estimate of enrichment, that is, the increased likelihood (versus random) of this sample being in the category.

Bayesian Score: The standard Laplacian-modified Bayesian score.

Mahalanobis Distance: The Mahalanobis distance (MD) is the distance to the center of the training data. The larger the MD, the less trustworthy the prediction.

Mahalanobis Distance p-value: The p-value gives the fraction of training data with an MD greater than or equal to the one for the given sample, assuming normally distributed data. The smaller the p-value, the less trustworthy the prediction. For highly non-normal X properties (e.g., fingerprints), the MD p-value is wildly inaccurate.

## Structural Similar Compounds

| Name               | Olsalazine                                                          | Minocycline                                                         | Tetracycline                                                        |
|--------------------|---------------------------------------------------------------------|---------------------------------------------------------------------|---------------------------------------------------------------------|
| Structure          |                                                                     |                                                                     |                                                                     |
| Actual Endpoint    | Non-Carcinogen                                                      | Non-Carcinogen                                                      | Non-Carcinogen                                                      |
| Predicted Endpoint | Carcinogen                                                          | Non-Carcinogen                                                      | Non-Carcinogen                                                      |
| Distance           | 0.641                                                               | 0.725                                                               | 0.773                                                               |
| Reference          | US FDA (Centre for Drug Eval.& Res./Off. Testing & Res.) Sept. 1997 | US FDA (Centre for Drug Eval.& Res./Off. Testing & Res.) Sept. 1997 | US FDA (Centre for Drug Eval.& Res./Off. Testing & Res.) Sept. 1997 |

## Model Applicability

Unknown features are fingerprint features in the query molecule, but not found or appearing too infrequently in the training set.

1. All properties and OPS components are within expected ranges.
2. Unknown FCFP\_2 feature: -1678245750: [\*]OC(=C([\*])([\*])[c](:[\*]):[\*])

## Feature Contribution

### Top features for positive contribution

| Fingerprint | Bit/Smiles | Feature Structure | Score | Carcinogen in training set |
|-------------|------------|-------------------|-------|----------------------------|
| FCFP_6      | 1872154524 | <br>[*]C(=O)[*]   | 0.205 | 69 out of 213              |

|                                        |             |                                                                                                                                                 |        |                            |
|----------------------------------------|-------------|-------------------------------------------------------------------------------------------------------------------------------------------------|--------|----------------------------|
| FCFP_6                                 | 0           | 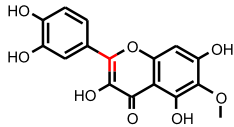<br><chem>[*]C(=[*])[*]</chem>                               | 0.114  | 90 out of 305              |
| FCFP_6                                 | 1           | <br><chem>[*]O[*]</chem>                                     | 0.0783 | 76 out of 267              |
| Top Features for negative contribution |             |                                                                                                                                                 |        |                            |
| Fingerprint                            | Bit/Smiles  | Feature Structure                                                                                                                               | Score  | Carcinogen in training set |
| FCFP_6                                 | -1305924292 | <br><chem>[*]C(=C(O)C(=[*])[*])</chem>                       | -0.839 | 0 out of 5                 |
| FCFP_6                                 | -1549192822 | <br><chem>[*]C(=[*])C(=O)[c]([*])</chem>                    | -0.489 | 3 out of 21                |
| FCFP_6                                 | 523826990   | <br><chem>[*]O[c]1:[c]([*]):[*]:[c]([*]):[cH]:[c]:1</chem> | -0.423 | 0 out of 2                 |

# Remdesivir

# TOPKAT\_Mouse\_Male\_FDA\_None\_vs\_Carcinogen

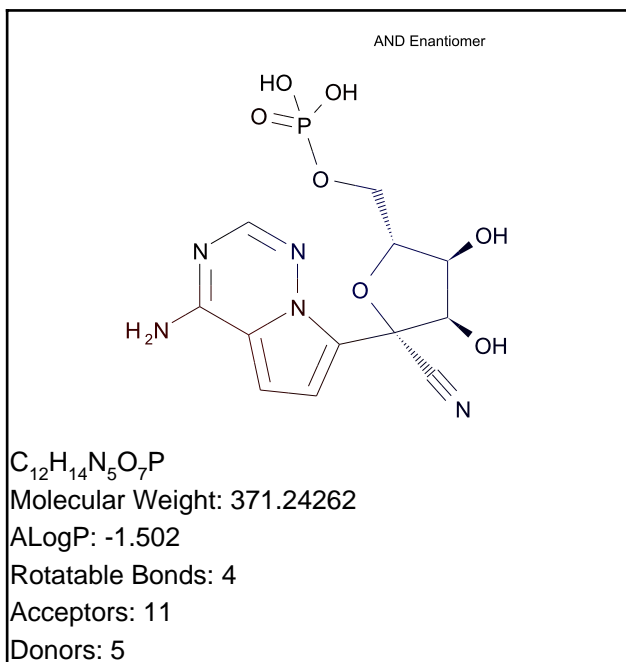

## Model Prediction

Prediction: Non-Carcinogen

Probability: 0.239

Enrichment: 0.812

Bayesian Score: -2.82

Mahalanobis Distance: 19.2

Mahalanobis Distance p-value: 7.81e-017

Prediction: Positive if the Bayesian score is above the estimated best cutoff value from minimizing the false positive and false negative rate.

Probability: The estimated probability that the sample is in the positive category. This assumes that the Bayesian score follows a normal distribution and is different from the prediction using a cutoff.

Enrichment: An estimate of enrichment, that is, the increased likelihood (versus random) of this sample being in the category.

Bayesian Score: The standard Laplacian-modified Bayesian score.

Mahalanobis Distance: The Mahalanobis distance (MD) is the distance to the center of the training data. The larger the MD, the less trustworthy the prediction.

Mahalanobis Distance p-value: The p-value gives the fraction of training data with an MD greater than or equal to the one for the given sample, assuming normally distributed data. The smaller the p-value, the less trustworthy the prediction. For highly non-normal X properties (e.g., fingerprints), the MD p-value is wildly inaccurate.

## Structural Similar Compounds

| Name               | Famotidine                                                                          | Tetracycline                                                                        | Ribavirin                                                                           |
|--------------------|-------------------------------------------------------------------------------------|-------------------------------------------------------------------------------------|-------------------------------------------------------------------------------------|
| Structure          | 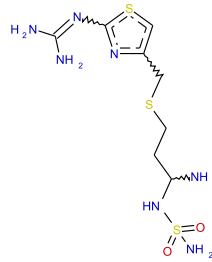 |  |  |
| Actual Endpoint    | Non-Carcinogen                                                                      | Non-Carcinogen                                                                      | Non-Carcinogen                                                                      |
| Predicted Endpoint | Non-Carcinogen                                                                      | Non-Carcinogen                                                                      | Non-Carcinogen                                                                      |
| Distance           | 0.813                                                                               | 0.843                                                                               | 0.860                                                                               |
| Reference          | US FDA (Centre for Drug Eval.& Res./Off. Testing & Res.) Sept. 1997                 | US FDA (Centre for Drug Eval.& Res./Off. Testing & Res.) Sept. 1997                 | US FDA (Centre for Drug Eval.& Res./Off. Testing & Res.) Sept. 1997                 |

## Model Applicability

Unknown features are fingerprint features in the query molecule, but not found or appearing too infrequently in the training set.

1. All properties and OPS components are within expected ranges.
2. Unknown FCFP\_2 feature: 472180098: [\*]OP(=O)(O)O
3. Unknown FCFP\_2 feature: -332197802: [\*][c]1:[\*]:[\*]:[c]([\*]):n:1:n:[\*]

## Feature Contribution

### Top features for positive contribution

| Fingerprint | Bit/Smiles | Feature Structure                                                                                                                                                                                   | Score | Carcinogen in training set |
|-------------|------------|-----------------------------------------------------------------------------------------------------------------------------------------------------------------------------------------------------|-------|----------------------------|
| FCFP_6      | -450797925 | <p style="text-align: center;">AND Enantiomer</p> 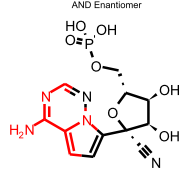 <p><chem>N[c]1n:[cH]:[*]:n2:[*]:[*]:[cH]:[c]:1:2</chem></p> | 0.676 | 2 out of 2                 |

|                                        |             |                                                                                                                                                                            |        |                            |
|----------------------------------------|-------------|----------------------------------------------------------------------------------------------------------------------------------------------------------------------------|--------|----------------------------|
| FCFP_6                                 | -1151884458 | <p>AND Enantiomer</p> 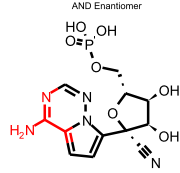 <p>[*]:n:[c](N):[c](:[*])<br/>):[*]</p>                          | 0.348  | 6 out of 15                |
| FCFP_6                                 | -1280036918 | <p>AND Enantiomer</p>  <p>[*]C([*])([*])[c]1:[c]<br/>H]:[cH]:[c](:[*]):n:<br/>1:[*]</p> | 0.333  | 7 out of 18                |
| Top Features for negative contribution |             |                                                                                                                                                                            |        |                            |
| Fingerprint                            | Bit/Smiles  | Feature Structure                                                                                                                                                          | Score  | Carcinogen in training set |
| FCFP_6                                 | -124685461  | <p>AND Enantiomer</p>  <p>[*]:n:[cH]:n:[*]</p>                                          | -0.731 | 1 out of 12                |
| FCFP_6                                 | -1277879912 | <p>AND Enantiomer</p>  <p>[*]C([*])([*])C#N</p>                                        | -0.582 | 0 out of 3                 |
| FCFP_6                                 | 422052003   | <p>AND Enantiomer</p>  <p>[*]C[C@H]1OC([*])([*])<br/>:[C@H](O)[C@H]1O</p>             | -0.582 | 0 out of 3                 |

# Patuletin

# TOPKAT\_Ocular\_Irritancy\_Mild\_vs\_Moderate\_Severe

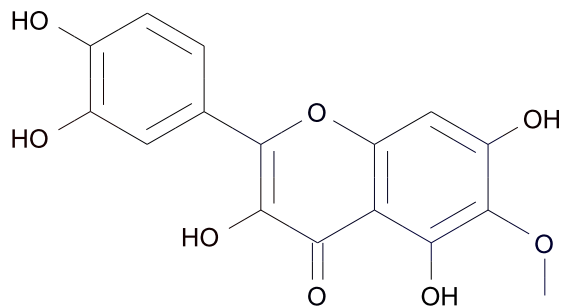

C<sub>16</sub>H<sub>12</sub>O<sub>8</sub>

Molecular Weight: 332.26168

ALogP: 1.614

Rotatable Bonds: 2

Acceptors: 8

Donors: 5

## Model Prediction

Prediction: Mild

Probability: 0.805

Enrichment: 1.17

Bayesian Score: -0.821

Mahalanobis Distance: 13.3

Mahalanobis Distance p-value: 3.72e-008

Prediction: Positive if the Bayesian score is above the estimated best cutoff value from minimizing the false positive and false negative rate.

Probability: The estimated probability that the sample is in the positive category. This assumes that the Bayesian score follows a normal distribution and is different from the prediction using a cutoff.

Enrichment: An estimate of enrichment, that is, the increased likelihood (versus random) of this sample being in the category. Bayesian Score: The standard Laplacian-modified Bayesian score.

Mahalanobis Distance: The Mahalanobis distance (MD) is the distance to the center of the training data. The larger the MD, the less trustworthy the prediction.

Mahalanobis Distance p-value: The p-value gives the fraction of training data with an MD greater than or equal to the one for the given sample, assuming normally distributed data. The smaller the p-value, the less trustworthy the prediction. For highly non-normal X properties (e.g., fingerprints), the MD p-value is wildly inaccurate.

## Structural Similar Compounds

| Name               | ANTHRAQUINONE; 1;5-DIAMINO-4;8-DIHYDROXY-3-(p-METHOXYPHENYL)- | ANTHRAQUINONE; 1;4;5;8-TETRAHYDROXY- | 2-Naphthalenesulfonic acid; 5;6'-iminobis(1-hydroxy-                    |
|--------------------|---------------------------------------------------------------|--------------------------------------|-------------------------------------------------------------------------|
| Structure          |                                                               |                                      |                                                                         |
| Actual Endpoint    | Mild                                                          | Mild                                 | Mild                                                                    |
| Predicted Endpoint | Mild                                                          | Mild                                 | Mild                                                                    |
| Distance           | 0.727                                                         | 0.754                                | 0.760                                                                   |
| Reference          | 28ZPAK 245;72                                                 | 28ZPAK-;104;72                       | Prehled Prumyslove Toxikologie; Organicke Latky; Marhold; J. pp 1065;86 |

## Model Applicability

Unknown features are fingerprint features in the query molecule, but not found or appearing too infrequently in the training set.

1. All properties and OPS components are within expected ranges.
2. Unknown FCFP\_2 feature: -1678245750: [\*]OC(=C([\*])([\*])[c](:[\*]):[\*])
3. Unknown FCFP\_2 feature: -1305924292: [\*]C(=C(O)C(=[\*])([\*])[\*])

## Feature Contribution

### Top features for positive contribution

| Fingerprint | Bit/Smiles | Feature Structure | Score | Moderate_Severe in training set |
|-------------|------------|-------------------|-------|---------------------------------|
|             |            |                   |       |                                 |



|         |            |                                                                                                                                             |       |                |
|---------|------------|---------------------------------------------------------------------------------------------------------------------------------------------|-------|----------------|
| FCFP_10 | -548632217 | 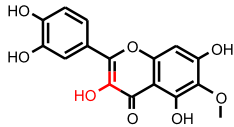<br><chem>[*]C(=[*])O</chem>                             | 0.319 | 54 out of 59   |
| FCFP_10 | 7          | <br><chem>[*]O</chem>                                    | 0.219 | 117 out of 142 |
| FCFP_10 | 1727347865 | <br><chem>[*][c]1:[cH]:[cH]:[c]:(O):[c](O):[cH]:1</chem> | 0.186 | 1 out of 1     |

### Top Features for negative contribution

| Fingerprint | Bit/Smiles  | Feature Structure                                                                                                                                             | Score  | Moderate_Severe in training set |
|-------------|-------------|---------------------------------------------------------------------------------------------------------------------------------------------------------------|--------|---------------------------------|
| FCFP_10     | -1977641857 | 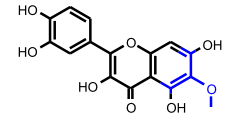<br><chem>[*][c](:[*]):[c](OC):[c]([*]):[*]</chem>                       | -0.78  | 4 out of 15                     |
| FCFP_10     | -1099193755 | <br><chem>[*]C1=[*]C(=[*])[c]2:[c]([*]):[*]:[c]([*]):[cH]:[c]:2O1</chem> | -0.361 | 2 out of 5                      |

|         |           |                                                                                                  |        |              |
|---------|-----------|--------------------------------------------------------------------------------------------------|--------|--------------|
| FCFP_10 | 136627117 | 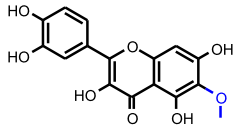 <p>[*]OC</p> | -0.316 | 46 out of 96 |
|---------|-----------|--------------------------------------------------------------------------------------------------|--------|--------------|

# Remdesivir

# TOPKAT\_Ocular\_Irritancy\_Mild\_vs\_Moderate\_Severe

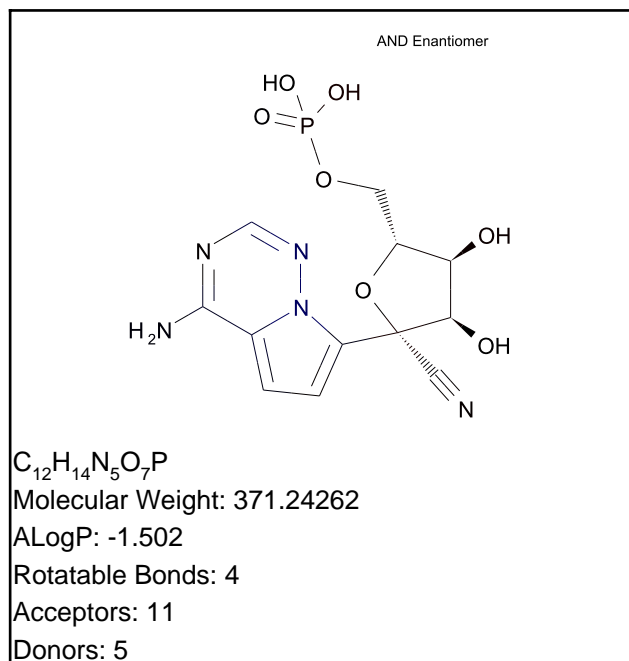

## Model Prediction

Prediction: Mild

Probability: 0.789

Enrichment: 1.15

Bayesian Score: -1.39

Mahalanobis Distance: 13.8

Mahalanobis Distance p-value: 1.42e-009

Prediction: Positive if the Bayesian score is above the estimated best cutoff value from minimizing the false positive and false negative rate.

Probability: The estimated probability that the sample is in the positive category. This assumes that the Bayesian score follows a normal distribution and is different from the prediction using a cutoff.

Enrichment: An estimate of enrichment, that is, the increased likelihood (versus random) of this sample being in the category.

Bayesian Score: The standard Laplacian-modified Bayesian score.

Mahalanobis Distance: The Mahalanobis distance (MD) is the distance to the center of the training data. The larger the MD, the less trustworthy the prediction.

Mahalanobis Distance p-value: The p-value gives the fraction of training data with an MD greater than or equal to the one for the given sample, assuming normally distributed data. The smaller the p-value, the less trustworthy the prediction. For highly non-normal X properties (e.g., fingerprints), the MD p-value is wildly inaccurate.

## Structural Similar Compounds

| Name               | 1;3;6-NAPHTHALENE TRISULFONIC ACID;7-AMINO-                                         | Methanol; (s-triazine-2;4;6-triyltrinitrilo)hexa-                                   | 2;2'-Biphenyldisulfonic acid; 4;4'-diamino-                                         |
|--------------------|-------------------------------------------------------------------------------------|-------------------------------------------------------------------------------------|-------------------------------------------------------------------------------------|
| Structure          | 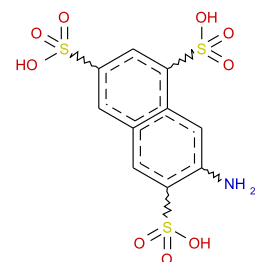 |  |  |
| Actual Endpoint    | Mild                                                                                | Moderate_Severe                                                                     | Mild                                                                                |
| Predicted Endpoint | Mild                                                                                | Moderate_Severe                                                                     | Mild                                                                                |
| Distance           | 0.776                                                                               | 0.802                                                                               | 0.878                                                                               |
| Reference          | 28ZPAK-;190;72                                                                      | Prehled Prumyslove Toxikologie; Organicke Latky; Marhold; J. -;876;86               | Prehled Prumyslove Toxikologie; Organicke Latky; Marhold; J. pp 1061;86             |

## Model Applicability

Unknown features are fingerprint features in the query molecule, but not found or appearing too infrequently in the training set.

- OPS PC17 out of range. Value: 4.6782. Training min, max, SD, explained variance: -4.348, 3.9505, 1.094, 0.0146.
- Unknown FCFP\_2 feature: 472180098: [\*]OP(=O)(O)O
- Unknown FCFP\_2 feature: -836603894: [\*][C@@H]1[\*][\*]O[C@]1(C#[\*])[c](:[\*]):[\*]
- Unknown FCFP\_2 feature: -124685461: [\*]:n:c:n:[\*]
- Unknown FCFP\_2 feature: -1151884458: [\*]:n:[c](N):[c](:[\*]):[\*]

## Feature Contribution

### Top features for positive contribution

| Fingerprint | Bit/Smiles | Feature Structure | Score | Moderate_Severe in training set |
|-------------|------------|-------------------|-------|---------------------------------|
|-------------|------------|-------------------|-------|---------------------------------|

|                                        |             |                                                                                                                                                       |        |                                 |
|----------------------------------------|-------------|-------------------------------------------------------------------------------------------------------------------------------------------------------|--------|---------------------------------|
| FCFP_10                                | 1070061035  | <p>AND Enantiomer</p> 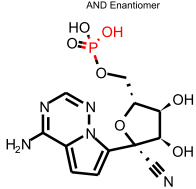 <p>[*]P(=[*])([*])O</p>                     | 0.239  | 284 out of 338                  |
| FCFP_10                                | -1539132615 | <p>AND Enantiomer</p>  <p>[*]C([*])([*])[c]1:[c]H]:[*]:n:1:[*]</p> | 0.224  | 11 out of 13                    |
| FCFP_10                                | -1043250487 | <p>AND Enantiomer</p>  <p>[*][C@H]1[*][C@H]([*])C@H]1O</p>         | 0.22   | 62 out of 75                    |
| Top Features for negative contribution |             |                                                                                                                                                       |        |                                 |
| Fingerprint                            | Bit/Smiles  | Feature Structure                                                                                                                                     | Score  | Moderate_Severe in training set |
| FCFP_10                                | 4427049     | <p>AND Enantiomer</p>  <p>[*]:[cH]:n:n(:[*]):[*]</p>              | -1.29  | 0 out of 4                      |
| FCFP_10                                | -332197802  | <p>AND Enantiomer</p>  <p>[*][c]1:[*]:[*]:[c]([*]):n:1:n:[*]</p> | -0.507 | 0 out of 1                      |

|         |           |                                                                                                                                                                                                                                                   |        |             |
|---------|-----------|---------------------------------------------------------------------------------------------------------------------------------------------------------------------------------------------------------------------------------------------------|--------|-------------|
| FCFP_10 | 713358128 | <p>AND Enantiomer</p> 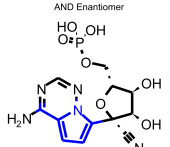 <p><chem>Nc1nc(C[C@@H]2O[C@H](COP(=O)(O)O)[C@@H](O)[C@H]2O)n1</chem></p> <p>[*][c](:[*]):[c]1:[cH]<br/>]:[cH]:[c]([*]):n:1:<br/>[*]</p> | -0.307 | 8 out of 17 |
|---------|-----------|---------------------------------------------------------------------------------------------------------------------------------------------------------------------------------------------------------------------------------------------------|--------|-------------|

# Patuletin

# TOPKAT\_Ocular\_Irritancy\_None\_vs\_Irritant

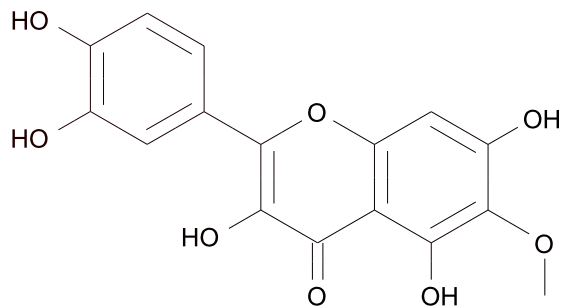

C<sub>16</sub>H<sub>12</sub>O<sub>8</sub>

Molecular Weight: 332.26168

ALogP: 1.614

Rotatable Bonds: 2

Acceptors: 8

Donors: 5

## Model Prediction

**Prediction: Irritant**

Probability: 1

Enrichment: 1.18

Bayesian Score: 1.34

Mahalanobis Distance: 9.63

Mahalanobis Distance p-value: 0.203

Prediction: Positive if the Bayesian score is above the estimated best cutoff value from minimizing the false positive and false negative rate.

Probability: The estimated probability that the sample is in the positive category. This assumes that the Bayesian score follows a normal distribution and is different from the prediction using a cutoff.

Enrichment: An estimate of enrichment, that is, the increased likelihood (versus random) of this sample being in the category.

Bayesian Score: The standard Laplacian-modified Bayesian score.

Mahalanobis Distance: The Mahalanobis distance (MD) is the distance to the center of the training data. The larger the MD, the less trustworthy the prediction.

Mahalanobis Distance p-value: The p-value gives the fraction of training data with an MD greater than or equal to the one for the given sample, assuming normally distributed data. The smaller the p-value, the less trustworthy the prediction. For highly non-normal X properties (e.g., fingerprints), the MD p-value is wildly inaccurate.

## Structural Similar Compounds

| Name               | ANTHRAQUINONE; 1;5-DIAMINO-4;8-DIHYDROXY-3-(p-METHOXYPHENYL)- | 2-Naphthalenesulfonic acid; 5;6'-iminobis(1-hydroxy-                    | ANTHRAQUINONE; 1;4;5;8-TETRAHYDROXY- |
|--------------------|---------------------------------------------------------------|-------------------------------------------------------------------------|--------------------------------------|
| Structure          |                                                               |                                                                         |                                      |
| Actual Endpoint    | Irritant                                                      | Irritant                                                                | Irritant                             |
| Predicted Endpoint | Irritant                                                      | Irritant                                                                | Irritant                             |
| Distance           | 0.727                                                         | 0.739                                                                   | 0.750                                |
| Reference          | 28ZPAK 245;72                                                 | Prehled Prumyslove Toxikologie; Organické Latky; Marhold; J. pp 1065;86 | 28ZPAK-;104;72                       |

## Model Applicability

Unknown features are fingerprint features in the query molecule, but not found or appearing too infrequently in the training set.

1. All properties and OPS components are within expected ranges.
2. Unknown FCFP\_2 feature: -1678245750: [\*]OC(=C([\*])([\*])[c]([\*]):[\*]):[\*]
3. Unknown FCFP\_2 feature: -1305924292: [\*]C(=C(O)C(=[\*])([\*])[\*])

## Feature Contribution

### Top features for positive contribution

| Fingerprint | Bit/Smiles | Feature Structure | Score | Irritant in training set |
|-------------|------------|-------------------|-------|--------------------------|
|             |            |                   |       |                          |

|                                        |             |                                                                                                                                                             |        |                          |
|----------------------------------------|-------------|-------------------------------------------------------------------------------------------------------------------------------------------------------------|--------|--------------------------|
| FCFP_12                                | -548632217  | 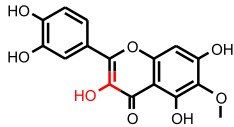<br><chem>[*]C(=[*])O</chem>                                             | 0.177  | 59 out of 61             |
| FCFP_12                                | -1099193755 | <br><chem>[*]C1=[*]C(=[*])[c]2:[c]([*]):[*]:[c]([*]):[cH]:[c]:2O1</chem> | 0.175  | 5 out of 5               |
| FCFP_12                                | -204034463  | <br><chem>[*][c]1:[*]:[cH]:[c](O):[c](O):[cH]:1</chem>                   | 0.175  | 5 out of 5               |
| Top Features for negative contribution |             |                                                                                                                                                             |        |                          |
| Fingerprint                            | Bit/Smiles  | Feature Structure                                                                                                                                           | Score  | Irritant in training set |
| FCFP_12                                | 1673930087  | <br><chem>[*]O[c]1:[cH]:[c](O):[c]([*]):[*]:[c]:1[*]</chem>             | -0.218 | 5 out of 8               |
| FCFP_12                                | 0           | <br><chem>[*]C(=[*])[*]</chem>                                         | 0      | 1184 out of 1397         |

FCFP\_12

203677720

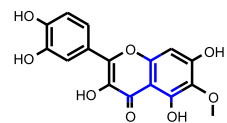

[\*]C(=[\*])[c](:[c]([\*]  
)):[\*]):[c]([\*]):[\*]

0

319 out of 382



# Remdesivir

# TOPKAT\_Ocular\_Irritancy\_None\_vs\_Irritant

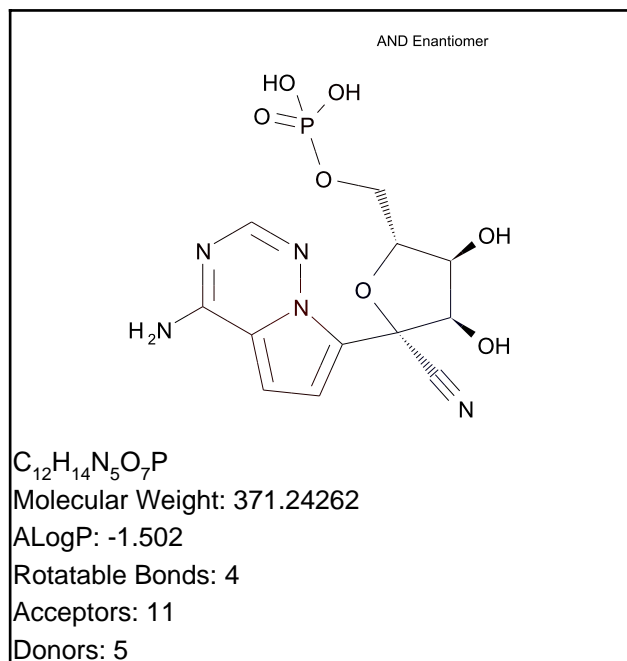

## Model Prediction

**Prediction: Irritant**

Probability: 1

Enrichment: 1.18

Bayesian Score: 1.33

Mahalanobis Distance: 10.7

Mahalanobis Distance p-value: 0.0147

Prediction: Positive if the Bayesian score is above the estimated best cutoff value from minimizing the false positive and false negative rate.

Probability: The estimated probability that the sample is in the positive category. This assumes that the Bayesian score follows a normal distribution and is different from the prediction using a cutoff.

Enrichment: An estimate of enrichment, that is, the increased likelihood (versus random) of this sample being in the category.

Bayesian Score: The standard Laplacian-modified Bayesian score.

Mahalanobis Distance: The Mahalanobis distance (MD) is the distance to the center of the training data. The larger the MD, the less trustworthy the prediction.

Mahalanobis Distance p-value: The p-value gives the fraction of training data with an MD greater than or equal to the one for the given sample, assuming normally distributed data. The smaller the p-value, the less trustworthy the prediction. For highly non-normal X properties (e.g., fingerprints), the MD p-value is wildly inaccurate.

## Structural Similar Compounds

| Name               | 1;3;6-NAPHTHALENE TRISULFONIC ACID;7-AMINO- | Methanol; (s-triazine-2;4;6-triyltrinitrilo)hexa-                     | 2;2'-Biphenyldisulfonic acid; 4;4'-diamino-                             |
|--------------------|---------------------------------------------|-----------------------------------------------------------------------|-------------------------------------------------------------------------|
| Structure          |                                             |                                                                       |                                                                         |
| Actual Endpoint    | Irritant                                    | Irritant                                                              | Irritant                                                                |
| Predicted Endpoint | Irritant                                    | Irritant                                                              | Irritant                                                                |
| Distance           | 0.766                                       | 0.795                                                                 | 0.859                                                                   |
| Reference          | 28ZPAK-;190;72                              | Prehled Prumyslove Toxikologie; Organicke Latky; Marhold; J. -;876;86 | Prehled Prumyslove Toxikologie; Organicke Latky; Marhold; J. pp 1061;86 |

## Model Applicability

Unknown features are fingerprint features in the query molecule, but not found or appearing too infrequently in the training set.

1. All properties and OPS components are within expected ranges.
2. Unknown FCFP\_2 feature: 472180098: [\*]OP(=O)(O)O
3. Unknown FCFP\_2 feature: -124685461: [\*]:n:c:n:[\*]
4. Unknown FCFP\_2 feature: -1151884458: [\*]:n:[c](N):[c](:[\*]):[\*]

## Feature Contribution

### Top features for positive contribution

| Fingerprint | Bit/Smiles | Feature Structure | Score | Irritant in training set |
|-------------|------------|-------------------|-------|--------------------------|
|             |            |                   |       |                          |

|                                        |             |                                                                                                                                                               |         |                          |
|----------------------------------------|-------------|---------------------------------------------------------------------------------------------------------------------------------------------------------------|---------|--------------------------|
| FCFP_12                                | 1747237384  | <p>AND Enantiomer</p> 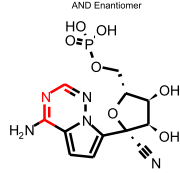 <p>[*][c](:[*]):n:[cH]:[*]</p>                      | 0.208   | 44 out of 44             |
| FCFP_12                                | 178336375   | <p>AND Enantiomer</p>  <p>[*][c](:[*]):[c]1:[cH]:[*]:[*]:n:1:[*]</p>       | 0.202   | 19 out of 19             |
| FCFP_12                                | 713358128   | <p>AND Enantiomer</p>  <p>[*][c](:[*]):[c]1:[cH]:[cH]:[c]([*]):n:1:[*]</p> | 0.2     | 17 out of 17             |
| Top Features for negative contribution |             |                                                                                                                                                               |         |                          |
| Fingerprint                            | Bit/Smiles  | Feature Structure                                                                                                                                             | Score   | Irritant in training set |
| FCFP_12                                | -836603894  | <p>AND Enantiomer</p>  <p>[*][C@@H]1[*][*]O[C@]1(C#N)[c]([*]):[*]</p>     | -0.592  | 0 out of 1               |
| FCFP_12                                | -1277879912 | <p>AND Enantiomer</p>  <p>[*]C([*])([*])C#N</p>                          | -0.0939 | 33 out of 45             |

|         |             |                                                                                                                                   |   |                |
|---------|-------------|-----------------------------------------------------------------------------------------------------------------------------------|---|----------------|
| FCFP_12 | -1272768868 | <p>AND Enantiomer</p> 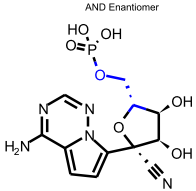 <p>[*]OCC([*])([*])</p> | 0 | 396 out of 514 |
|---------|-------------|-----------------------------------------------------------------------------------------------------------------------------------|---|----------------|

# Patuletin

# TOPKAT\_Rat\_Female\_FDA\_None\_vs\_Carcinogen

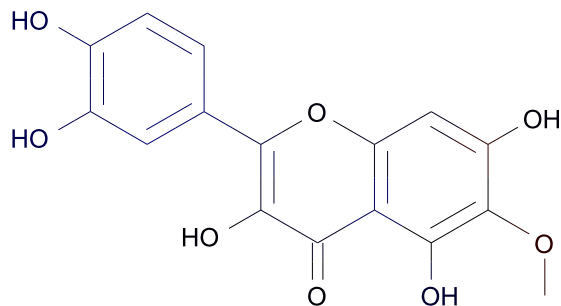

C<sub>16</sub>H<sub>12</sub>O<sub>8</sub>

Molecular Weight: 332.26168

ALogP: 1.614

Rotatable Bonds: 2

Acceptors: 8

Donors: 5

## Model Prediction

Prediction: Non-Carcinogen

Probability: 0.228

Enrichment: 0.709

Bayesian Score: -4.4

Mahalanobis Distance: 11.8

Mahalanobis Distance p-value: 0.00851

Prediction: Positive if the Bayesian score is above the estimated best cutoff value from minimizing the false positive and false negative rate.

Probability: The estimated probability that the sample is in the positive category. This assumes that the Bayesian score follows a normal distribution and is different from the prediction using a cutoff.

Enrichment: An estimate of enrichment, that is, the increased likelihood (versus random) of this sample being in the category.

Bayesian Score: The standard Laplacian-modified Bayesian score.

Mahalanobis Distance: The Mahalanobis distance (MD) is the distance to the center of the training data. The larger the MD, the less trustworthy the prediction.

Mahalanobis Distance p-value: The p-value gives the fraction of training data with an MD greater than or equal to the one for the given sample, assuming normally distributed data. The smaller the p-value, the less trustworthy the prediction. For highly non-normal X properties (e.g., fingerprints), the MD p-value is wildly inaccurate.

## Structural Similar Compounds

| Name               | Olsalazine                                                          | Carbidopa                                                           | Lodoxamide                                                          |
|--------------------|---------------------------------------------------------------------|---------------------------------------------------------------------|---------------------------------------------------------------------|
| Structure          |                                                                     |                                                                     |                                                                     |
| Actual Endpoint    | Non-Carcinogen                                                      | Non-Carcinogen                                                      | Non-Carcinogen                                                      |
| Predicted Endpoint | Non-Carcinogen                                                      | Non-Carcinogen                                                      | Non-Carcinogen                                                      |
| Distance           | 0.695                                                               | 0.749                                                               | 0.754                                                               |
| Reference          | US FDA (Centre for Drug Eval.& Res./Off. Testing & Res.) Sept. 1997 | US FDA (Centre for Drug Eval.& Res./Off. Testing & Res.) Sept. 1997 | US FDA (Centre for Drug Eval.& Res./Off. Testing & Res.) Sept. 1997 |

## Model Applicability

Unknown features are fingerprint features in the query molecule, but not found or appearing too infrequently in the training set.

1. All properties and OPS components are within expected ranges.

## Feature Contribution

### Top features for positive contribution

| Fingerprint | Bit/Smiles | Feature Structure                         | Score | Carcinogen in training set |
|-------------|------------|-------------------------------------------|-------|----------------------------|
| ECFP_12     | 2052151141 | <br>[*][c](:[*]):[c](OC):<br>[c]([*]):[*] | 0.668 | 4 out of 5                 |

| ECFP_12                                | -1531301414 | 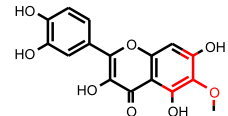<br><chem>[*]O[c](:[c]([*]):[*]) : [c]([*]):[*]</chem>    | 0.454  | 5 out of 9                 |
|----------------------------------------|-------------|----------------------------------------------------------------------------------------------------------------------------------------------|--------|----------------------------|
| ECFP_12                                | 683445015   | <br><chem>[*]O[*]</chem>                                  | 0.294  | 28 out of 66               |
| Top Features for negative contribution |             |                                                                                                                                              |        |                            |
| Fingerprint                            | Bit/Smiles  | Feature Structure                                                                                                                            | Score  | Carcinogen in training set |
| ECFP_12                                | -1660913849 | <br><chem>[*][c](:[*]):[c](O):[c]([*]):[*]</chem>         | -0.941 | 0 out of 5                 |
| ECFP_12                                | -181568884  | <br><chem>[*]C(=[*])[c](:[cH]:[*]):[cH]:[*]</chem>       | -0.505 | 3 out of 18                |
| ECFP_12                                | 1310213750  | <br><chem>[*][c]1:[cH]:[cH]:[c](O):[c](O):[cH]:1</chem> | -0.485 | 0 out of 2                 |

# Remdesivir

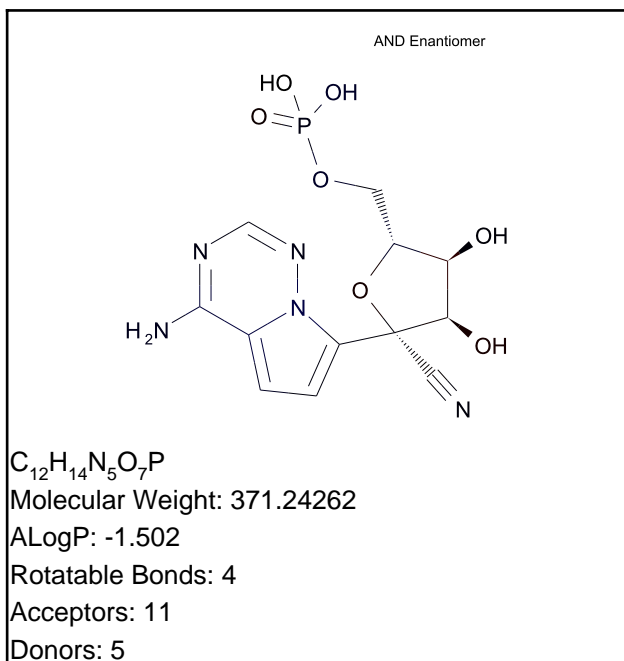

## Model Prediction

Prediction: Non-Carcinogen

Probability: 0.243

Enrichment: 0.756

Bayesian Score: -3.24

Mahalanobis Distance: 13.8

Mahalanobis Distance p-value: 5.04e-006

Prediction: Positive if the Bayesian score is above the estimated best cutoff value from minimizing the false positive and false negative rate.

Probability: The estimated probability that the sample is in the positive category. This assumes that the Bayesian score follows a normal distribution and is different from the prediction using a cutoff.

Enrichment: An estimate of enrichment, that is, the increased likelihood (versus random) of this sample being in the category. Bayesian Score: The standard Laplacian-modified Bayesian score.

Mahalanobis Distance: The Mahalanobis distance (MD) is the distance to the center of the training data. The larger the MD, the less trustworthy the prediction.

Mahalanobis Distance p-value: The p-value gives the fraction of training data with an MD greater than or equal to the one for the given sample, assuming normally distributed data. The smaller the p-value, the less trustworthy the prediction. For highly non-normal X properties (e.g., fingerprints), the MD p-value is wildly inaccurate.

# TOPKAT\_Rat\_Female\_FDA\_None\_vs\_Carcinogen

## Structural Similar Compounds

| Name               | Streptozocin                                                                        | Tetracycline                                                                        | Famotidine                                                                          |
|--------------------|-------------------------------------------------------------------------------------|-------------------------------------------------------------------------------------|-------------------------------------------------------------------------------------|
| Structure          | 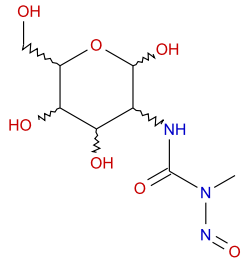 |  |  |
| Actual Endpoint    | Carcinogen                                                                          | Non-Carcinogen                                                                      | Non-Carcinogen                                                                      |
| Predicted Endpoint | Carcinogen                                                                          | Non-Carcinogen                                                                      | Non-Carcinogen                                                                      |
| Distance           | 0.810                                                                               | 0.858                                                                               | 0.861                                                                               |
| Reference          | US FDA (Centre for Drug Eval.& Res./Off. Testing & Res.) Sept. 1997                 | US FDA (Centre for Drug Eval.& Res./Off. Testing & Res.) Sept. 1997                 | US FDA (Centre for Drug Eval.& Res./Off. Testing & Res.) Sept. 1997                 |

## Model Applicability

Unknown features are fingerprint features in the query molecule, but not found or appearing too infrequently in the training set.

1. All properties and OPS components are within expected ranges.
2. Unknown ECFP\_2 feature: 1126642748: [\*]OP(=O)(O)O
3. Unknown ECFP\_2 feature: -1250439909: [\*]COP(=[\*])([\*])[\*]
4. Unknown ECFP\_2 feature: 1258791451: [\*][C@@H]1[\*][\*]O[C@]1(C#[\*])[c]([\*]):[\*]
5. Unknown ECFP\_2 feature: -1507082173: [\*][c]1[\*]:[\*]:[c]([\*]):n:1:n:[\*]
6. Unknown ECFP\_2 feature: -66263742: [\*]C([\*])([\*])[c]1:n([\*]):[\*]:[\*]:c:1

## Feature Contribution

### Top features for positive contribution

| Fingerprint | Bit/Smiles | Feature Structure | Score | Carcinogen in training set |
|-------------|------------|-------------------|-------|----------------------------|
|             |            |                   |       |                            |

| ECFP_12                                | -553149446  | <p>AND Enantiomer</p> 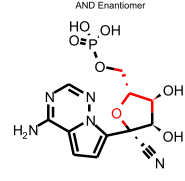 <p>[*][C@H]1O[*][*][C@@H]1[*]</p>                | 0.575  | 3 out of 4                 |
|----------------------------------------|-------------|------------------------------------------------------------------------------------------------------------------------------------------------------------|--------|----------------------------|
| ECFP_12                                | -1114776580 | <p>AND Enantiomer</p>  <p>[*]C#[*]</p>                                  | 0.461  | 10 out of 19               |
| ECFP_12                                | -521596699  | <p>AND Enantiomer</p>  <p>[*][C@@H]1[*][*][C@H]1O<br/>([*])[C@@H]1O</p> | 0.445  | 3 out of 5                 |
| Top Features for negative contribution |             |                                                                                                                                                            |        |                            |
| Fingerprint                            | Bit/Smiles  | Feature Structure                                                                                                                                          | Score  | Carcinogen in training set |
| ECFP_12                                | -1687549011 | <p>AND Enantiomer</p>  <p>[*]OCC([*])[*]</p>                           | -0.661 | 0 out of 3                 |
| ECFP_12                                | 2024329577  | <p>AND Enantiomer</p>  <p>[*]P(=[*])([*])O</p>                        | -0.661 | 0 out of 3                 |

ECFP\_12

-1734834311

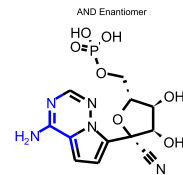

[\*]:n:[c](N):[c](:[\*]  
):[\*]

-0.56

1 out of 8



# Patuletin

# TOPKAT\_Rat\_Male\_FDA\_None\_vs\_Carcinogen

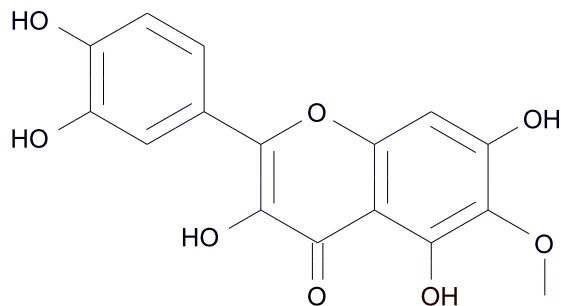

C<sub>16</sub>H<sub>12</sub>O<sub>8</sub>

Molecular Weight: 332.26168

ALogP: 1.614

Rotatable Bonds: 2

Acceptors: 8

Donors: 5

## Model Prediction

Prediction: Non-Carcinogen

Probability: 0.282

Enrichment: 0.845

Bayesian Score: -2.87

Mahalanobis Distance: 12.1

Mahalanobis Distance p-value: 0.0207

Prediction: Positive if the Bayesian score is above the estimated best cutoff value from minimizing the false positive and false negative rate.

Probability: The estimated probability that the sample is in the positive category. This assumes that the Bayesian score follows a normal distribution and is different from the prediction using a cutoff.

Enrichment: An estimate of enrichment, that is, the increased likelihood (versus random) of this sample being in the category.

Bayesian Score: The standard Laplacian-modified Bayesian score.

Mahalanobis Distance: The Mahalanobis distance (MD) is the distance to the center of the training data. The larger the MD, the less trustworthy the prediction.

Mahalanobis Distance p-value: The p-value gives the fraction of training data with an MD greater than or equal to the one for the given sample, assuming normally distributed data. The smaller the p-value, the less trustworthy the prediction. For highly non-normal X properties (e.g., fingerprints), the MD p-value is wildly inaccurate.

## Structural Similar Compounds

| Name               | Olsalazine                                                          | Carbidopa                                                           | Lodoxamide                                                          |
|--------------------|---------------------------------------------------------------------|---------------------------------------------------------------------|---------------------------------------------------------------------|
| Structure          |                                                                     |                                                                     |                                                                     |
| Actual Endpoint    | Non-Carcinogen                                                      | Non-Carcinogen                                                      | Non-Carcinogen                                                      |
| Predicted Endpoint | Carcinogen                                                          | Non-Carcinogen                                                      | Non-Carcinogen                                                      |
| Distance           | 0.651                                                               | 0.715                                                               | 0.726                                                               |
| Reference          | US FDA (Centre for Drug Eval.& Res./Off. Testing & Res.) Sept. 1997 | US FDA (Centre for Drug Eval.& Res./Off. Testing & Res.) Sept. 1997 | US FDA (Centre for Drug Eval.& Res./Off. Testing & Res.) Sept. 1997 |

## Model Applicability

Unknown features are fingerprint features in the query molecule, but not found or appearing too infrequently in the training set.

1. All properties and OPS components are within expected ranges.

## Feature Contribution

### Top features for positive contribution

| Fingerprint | Bit/Smiles  | Feature Structure                                       | Score | Carcinogen in training set |
|-------------|-------------|---------------------------------------------------------|-------|----------------------------|
| SCFP_6      | -1547271378 | <br><chem>[*][c]1:[*]:[cH]:[c](O):[c](OC):[c]:1O</chem> | 0.603 | 2 out of 2                 |

|                                        |            |                                                                                                                                                          |        |                            |
|----------------------------------------|------------|----------------------------------------------------------------------------------------------------------------------------------------------------------|--------|----------------------------|
| SCFP_6                                 | 392579710  | 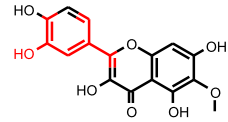 <chem>[*]C(=[*])[c]1:[cH]:[*]:[c]([*]):[c](O):[cH]:1</chem>          | 0.425  | 2 out of 3                 |
| SCFP_6                                 | 1157879834 |  <chem>[*]C1=[*]C(=[*])[c]2:[c]([*]):[*]:[c]([*]):[cH]:[c]:2O1</chem> | 0.198  | 1 out of 2                 |
| Top Features for negative contribution |            |                                                                                                                                                          |        |                            |
| Fingerprint                            | Bit/Smiles | Feature Structure                                                                                                                                        | Score  | Carcinogen in training set |
| SCFP_6                                 | 2116304939 |  <chem>[*]O[c]1:[c]([*]):[*]:[c]([*]):[cH]:[c]:1</chem>               | -0.825 | 0 out of 4                 |
| SCFP_6                                 | -700178387 |  <chem>[*][c]1:[cH]:[cH]:[c](O):[c](O):[cH]:1</chem>                 | -0.496 | 0 out of 2                 |
| SCFP_6                                 | 616636418  |  <chem>[*]OC(=C([*]))[c]([*]):[*]</chem>                            | -0.278 | 0 out of 1                 |

# Remdesivir

# TOPKAT\_Rat\_Male\_FDA\_None\_vs\_Carcinogen

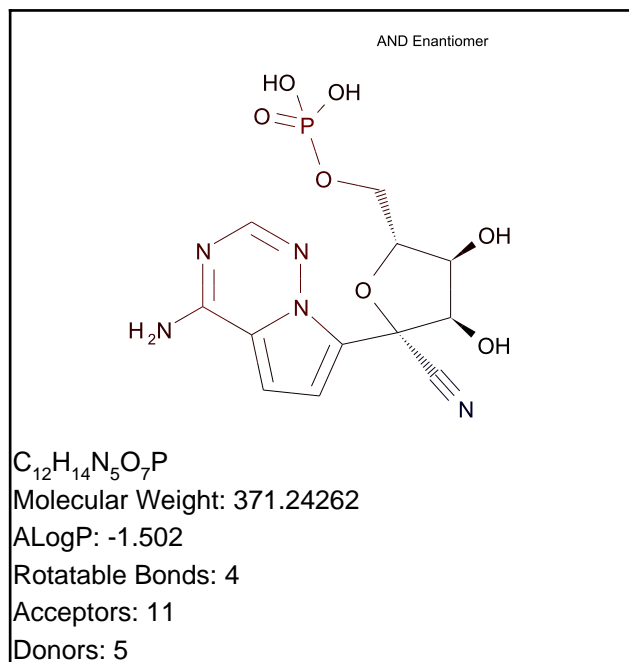

## Model Prediction

Prediction: Carcinogen

Probability: 0.481

Enrichment: 1.44

Bayesian Score: 3.82

Mahalanobis Distance: 14.1

Mahalanobis Distance p-value: 3.32e-005

Prediction: Positive if the Bayesian score is above the estimated best cutoff value from minimizing the false positive and false negative rate.

Probability: The estimated probability that the sample is in the positive category. This assumes that the Bayesian score follows a normal distribution and is different from the prediction using a cutoff.

Enrichment: An estimate of enrichment, that is, the increased likelihood (versus random) of this sample being in the category.

Bayesian Score: The standard Laplacian-modified Bayesian score.

Mahalanobis Distance: The Mahalanobis distance (MD) is the distance to the center of the training data. The larger the MD, the less trustworthy the prediction.

Mahalanobis Distance p-value: The p-value gives the fraction of training data with an MD greater than or equal to the one for the given sample, assuming normally distributed data. The smaller the p-value, the less trustworthy the prediction. For highly non-normal X properties (e.g., fingerprints), the MD p-value is wildly inaccurate.

## Structural Similar Compounds

| Name               | Streptozocin                                                                        | Famotidine                                                                          | Tetracycline                                                                        |
|--------------------|-------------------------------------------------------------------------------------|-------------------------------------------------------------------------------------|-------------------------------------------------------------------------------------|
| Structure          | 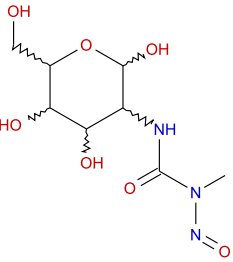 |  |  |
| Actual Endpoint    | Carcinogen                                                                          | Non-Carcinogen                                                                      | Non-Carcinogen                                                                      |
| Predicted Endpoint | Carcinogen                                                                          | Non-Carcinogen                                                                      | Non-Carcinogen                                                                      |
| Distance           | 0.789                                                                               | 0.850                                                                               | 0.856                                                                               |
| Reference          | US FDA (Centre for Drug Eval.& Res./Off. Testing & Res.) Sept. 1997                 | US FDA (Centre for Drug Eval.& Res./Off. Testing & Res.) Sept. 1997                 | US FDA (Centre for Drug Eval.& Res./Off. Testing & Res.) Sept. 1997                 |

## Model Applicability

Unknown features are fingerprint features in the query molecule, but not found or appearing too infrequently in the training set.

1. All properties and OPS components are within expected ranges.

## Feature Contribution

### Top features for positive contribution

| Fingerprint | Bit/Smiles  | Feature Structure                                                                                                                       | Score | Carcinogen in training set |
|-------------|-------------|-----------------------------------------------------------------------------------------------------------------------------------------|-------|----------------------------|
| SCFP_6      | -1029620989 | <p>AND Enantiomer</p> 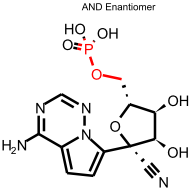 <p>[*]COP(=[*])([*])[*]</p> | 0.712 | 3 out of 3                 |

|                                        |             |                                                                                                                                                            |        |                            |
|----------------------------------------|-------------|------------------------------------------------------------------------------------------------------------------------------------------------------------|--------|----------------------------|
| SCFP_6                                 | 1245795878  | <p>AND Enantiomer</p> 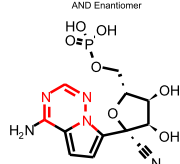 <p>[*][c]1:[*]:n(:[*]):n<br/>:[cH]:n:1</p>       | 0.603  | 2 out of 2                 |
| SCFP_6                                 | 149212520   | <p>AND Enantiomer</p>  <p>[*]:[cH]:n:n(:[*]):[*]<br/>]</p>              | 0.543  | 9 out of 15                |
| Top Features for negative contribution |             |                                                                                                                                                            |        |                            |
| Fingerprint                            | Bit/Smiles  | Feature Structure                                                                                                                                          | Score  | Carcinogen in training set |
| SCFP_6                                 | -1019297400 | <p>AND Enantiomer</p>  <p>[*]C([*])([*])C#N</p>                         | -0.674 | 0 out of 3                 |
| SCFP_6                                 | 194135988   | <p>AND Enantiomer</p>  <p>N[c]1:n:[cH]:[*]:n2:[*]:[*]:[cH]:[c]:1:2</p> | -0.278 | 0 out of 1                 |
| SCFP_6                                 | -424515134  | <p>AND Enantiomer</p>  <p>[*]C([*])O</p>                              | -0.157 | 30 out of 110              |

# Remdesivir

# TOPKAT\_Rat\_Male\_FDA\_Single\_vs\_Multiple

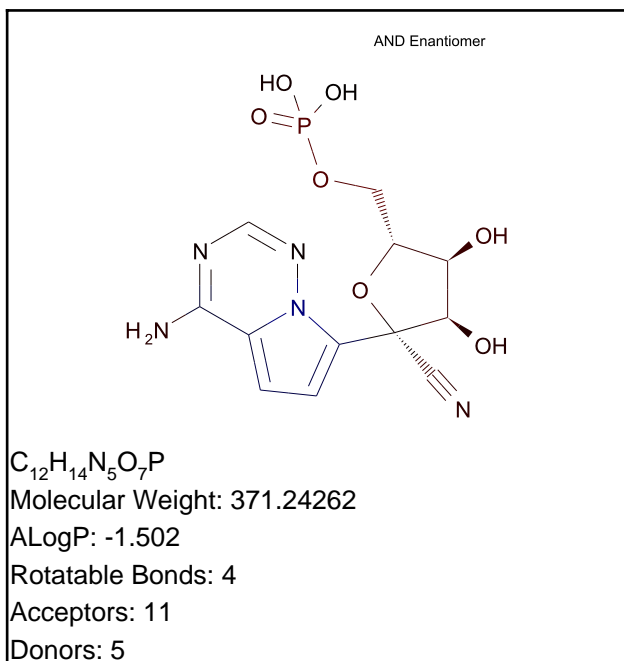

## Model Prediction

**Prediction: Multiple-Carcinogen**

Probability: 0.556

Enrichment: 1.34

Bayesian Score: 3.52

Mahalanobis Distance: 14

Mahalanobis Distance p-value: 8.72e-005

Prediction: Positive if the Bayesian score is above the estimated best cutoff value from minimizing the false positive and false negative rate.

Probability: The estimated probability that the sample is in the positive category. This assumes that the Bayesian score follows a normal distribution and is different from the prediction using a cutoff.

Enrichment: An estimate of enrichment, that is, the increased likelihood (versus random) of this sample being in the category.

Bayesian Score: The standard Laplacian-modified Bayesian score.

Mahalanobis Distance: The Mahalanobis distance (MD) is the distance to the center of the training data. The larger the MD, the less trustworthy the prediction.

Mahalanobis Distance p-value: The p-value gives the fraction of training data with an MD greater than or equal to the one for the given sample, assuming normally distributed data. The smaller the p-value, the less trustworthy the prediction. For highly non-normal X properties (e.g., fingerprints), the MD p-value is wildly inaccurate.

## Structural Similar Compounds

| Name               | Streptozocin                                                                        | Minocycline                                                                         | Ribavirin                                                                           |
|--------------------|-------------------------------------------------------------------------------------|-------------------------------------------------------------------------------------|-------------------------------------------------------------------------------------|
| Structure          | 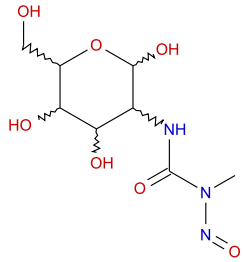 |  |  |
| Actual Endpoint    | Multiple-Carcinogen                                                                 | Single-Carcinogen                                                                   | Multiple-Carcinogen                                                                 |
| Predicted Endpoint | Multiple-Carcinogen                                                                 | Single-Carcinogen                                                                   | Multiple-Carcinogen                                                                 |
| Distance           | 0.817                                                                               | 0.908                                                                               | 0.929                                                                               |
| Reference          | US FDA (Centre for Drug Eval.& Res./Off. Testing & Res.) Sept. 1997                 | US FDA (Centre for Drug Eval.& Res./Off. Testing & Res.) Sept. 1997                 | US FDA (Centre for Drug Eval.& Res./Off. Testing & Res.) Sept. 1997                 |

## Model Applicability

Unknown features are fingerprint features in the query molecule, but not found or appearing too infrequently in the training set.

1. Num\_H\_Acceptors out of range. Value: 11. Training min, max, mean, SD: 0, 9, 3.8906, 2.196.

## Feature Contribution

### Top features for positive contribution

| Fingerprint | Bit/Smiles  | Feature Structure                                                                                                                       | Score | Multiple-Carcinogen in training set |
|-------------|-------------|-----------------------------------------------------------------------------------------------------------------------------------------|-------|-------------------------------------|
| SCFP_8      | -1029620989 | <p>AND Enantiomer</p> 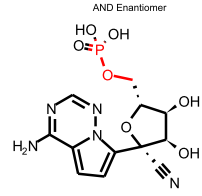 <p>[*]COP(=[*])([*])[*]</p> | 0.649 | 3 out of 3                          |

|                                        |             |                                                                                                                                                                   |        |                                     |
|----------------------------------------|-------------|-------------------------------------------------------------------------------------------------------------------------------------------------------------------|--------|-------------------------------------|
| SCFP_8                                 | 2           | <p>AND Enantiomer</p> 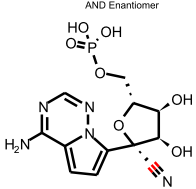 <p>[*]C#[*]</p>                                         | 0.584  | 6 out of 8                          |
| SCFP_8                                 | -1486266146 | <p>AND Enantiomer</p>  <p>[*]C[C@H]1OC([*])([*])C@H]([O])C@H]1O</p>            | 0.553  | 2 out of 2                          |
| Top Features for negative contribution |             |                                                                                                                                                                   |        |                                     |
| Fingerprint                            | Bit/Smiles  | Feature Structure                                                                                                                                                 | Score  | Multiple-Carcinogen in training set |
| SCFP_8                                 | -1381862798 | <p>AND Enantiomer</p>  <p>[*][c](:[*]):[c]1:[cH]:[cH]:[c]([*]):n:1:[*]</p>     | -0.572 | 1 out of 7                          |
| SCFP_8                                 | 1245795878  | <p>AND Enantiomer</p>  <p>[*][c]1:[*]:n(:[*]):n:[cH]:n:1</p>                 | -0.546 | 0 out of 2                          |
| SCFP_8                                 | -1375522316 | <p>AND Enantiomer</p>  <p>[*]C([*])([*])[c]1:[cH]:[cH]:[c](:[*]):n:1:[*]</p> | -0.546 | 0 out of 2                          |



# Remdesivir

# TOPKAT\_Skin\_Irritancy\_Mild\_vs\_Moderate\_Severe

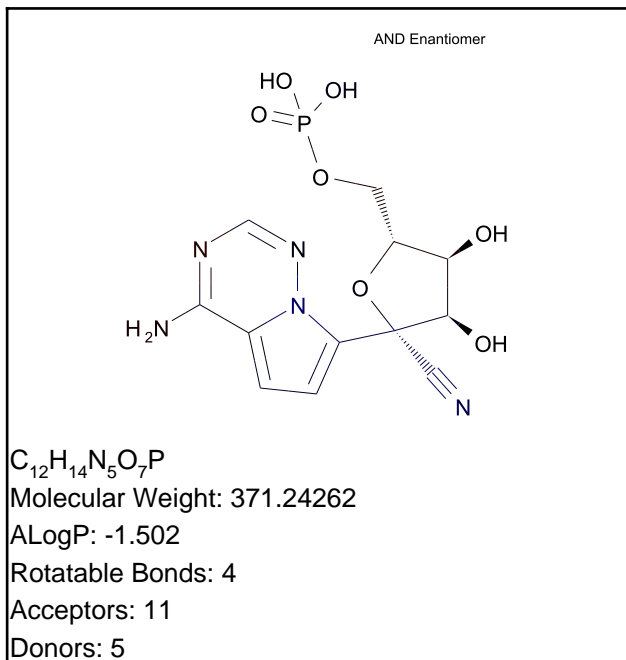

## Model Prediction

Prediction: Mild

Probability: 0.0911

Enrichment: 0.247

Bayesian Score: -8.73

Mahalanobis Distance: 13.5

Mahalanobis Distance p-value: 1.21e-009

Prediction: Positive if the Bayesian score is above the estimated best cutoff value from minimizing the false positive and false negative rate.

Probability: The estimated probability that the sample is in the positive category. This assumes that the Bayesian score follows a normal distribution and is different from the prediction using a cutoff.

Enrichment: An estimate of enrichment, that is, the increased likelihood (versus random) of this sample being in the category.

Bayesian Score: The standard Laplacian-modified Bayesian score.

Mahalanobis Distance: The Mahalanobis distance (MD) is the distance to the center of the training data. The larger the MD, the less trustworthy the prediction.

Mahalanobis Distance p-value: The p-value gives the fraction of training data with an MD greater than or equal to the one for the given sample, assuming normally distributed data. The smaller the p-value, the less trustworthy the prediction. For highly non-normal X properties (e.g., fingerprints), the MD p-value is wildly inaccurate.

## Structural Similar Compounds

| Name               | 1,3,6-Naphthalenetrisulfonic acid, 7-amino-                                                                                                            | 2,7-Anthracenedisulfonic acid, 9,10-dihydro-4,5-diamino-9,10-dioxo-1-hydroxy-, disodium salt                                                                                                                          | 1,5-Naphthalenedisulfonic acid, 2-amino-                                                                                                               |
|--------------------|--------------------------------------------------------------------------------------------------------------------------------------------------------|-----------------------------------------------------------------------------------------------------------------------------------------------------------------------------------------------------------------------|--------------------------------------------------------------------------------------------------------------------------------------------------------|
| Structure          |                                                                                                                                                        |                                                                                                                                                                                                                       |                                                                                                                                                        |
| Actual Endpoint    | Mild                                                                                                                                                   | Mild                                                                                                                                                                                                                  | Mild                                                                                                                                                   |
| Predicted Endpoint | Mild                                                                                                                                                   | Mild                                                                                                                                                                                                                  | Mild                                                                                                                                                   |
| Distance           | 0.759                                                                                                                                                  | 1.033                                                                                                                                                                                                                 | 1.137                                                                                                                                                  |
| Reference          | 85JCAE "Prehled Prumyslove Toxikologie; Organicke Latky," Marhold, J., Prague , Czechoslovakia, Avicenum, 1986<br>Volume(issue)/page/year: -,1058,1986 | 28ZPAK "Sbornik Vysledku Toxikologickeho Vysetreni Latek A Pripravku," Marhol d, J.V., Institut Pro Vychovu Vedoucicn Pracovniku Chemickeho Prumyclu Praha, Cz echoslovakia, 1972<br>Volume(issue)/page/year: -,239,1 | 85JCAE "Prehled Prumyslove Toxikologie; Organicke Latky," Marhold, J., Prague , Czechoslovakia, Avicenum, 1986<br>Volume(issue)/page/year: -,1058,1986 |

## Model Applicability

Unknown features are fingerprint features in the query molecule, but not found or appearing too infrequently in the training set.

1. All properties and OPS components are within expected ranges.
2. Unknown FCFP\_2 feature: 472180098: [\*]OP(=O)(O)O
3. Unknown FCFP\_2 feature: -332197802: [\*][c]1:[\*]:[\*]:[c]([\*]):n:1:n:[\*]

## Feature Contribution

### Top features for positive contribution

| Fingerprint | Bit/Smiles | Feature Structure | Score | Moderate_Severe in training set |
|-------------|------------|-------------------|-------|---------------------------------|
|-------------|------------|-------------------|-------|---------------------------------|



|                                        |             |                                                                                                                                                    |        |                                    |
|----------------------------------------|-------------|----------------------------------------------------------------------------------------------------------------------------------------------------|--------|------------------------------------|
| FCFP_12                                | -1151884458 | <p>AND Enantiomer</p> 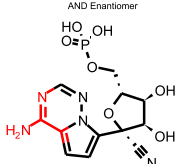 <p>[*]:n:[c](N):[c](:[*])<br/>):[*]</p>  | 0.385  | 1 out of 1                         |
| FCFP_12                                | 76292238    | <p>AND Enantiomer</p>  <p>[*]:[c]1:[*]:n:[cH]:n<br/>:[c]:1N</p> | 0.385  | 1 out of 1                         |
| FCFP_12                                | -124685461  | <p>AND Enantiomer</p>  <p>[*]:n:[cH]:n:[*]</p>                  | 0.206  | 2 out of 4                         |
| Top Features for negative contribution |             |                                                                                                                                                    |        |                                    |
| Fingerprint                            | Bit/Smiles  | Feature Structure                                                                                                                                  | Score  | Moderate_Severe<br>in training set |
| FCFP_12                                | 4427049     | <p>AND Enantiomer</p>  <p>[*]:[cH]:n:n(:[*]):[*]<br/>]</p>     | -0.893 | 0 out of 4                         |
| FCFP_12                                | -1277879912 | <p>AND Enantiomer</p>  <p>[*]C([*])([*])C#N</p>               | -0.548 | 5 out of 26                        |

|         |            |                                                                                                                                                                           |        |            |
|---------|------------|---------------------------------------------------------------------------------------------------------------------------------------------------------------------------|--------|------------|
| FCFP_12 | -836603894 | <p>AND Enantiomer</p> 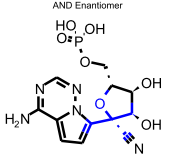 <p>[*][C@@H]1[*][*][O[C@H]1(C#N)[C@H](O)[C@H](O)OP(=O)(O)O]</p> | -0.543 | 0 out of 2 |
|---------|------------|---------------------------------------------------------------------------------------------------------------------------------------------------------------------------|--------|------------|

# Patuletin

# TOPKAT\_Skin\_Irritancy\_None\_vs\_Irritant

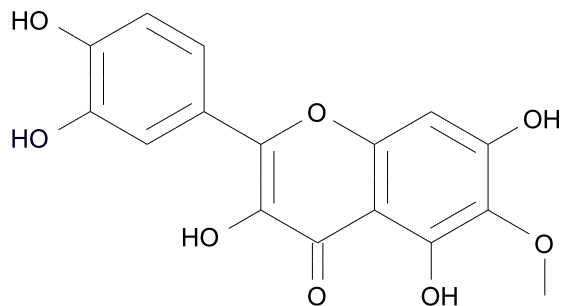

$C_{16}H_{12}O_8$

Molecular Weight: 332.26168

ALogP: 1.614

Rotatable Bonds: 2

Acceptors: 8

Donors: 5

## Model Prediction

Prediction: Non-Irritant

Probability: 0.958

Enrichment: 1.04

Bayesian Score: -1.64

Mahalanobis Distance: 13.8

Mahalanobis Distance p-value: 3.24e-010

Prediction: Positive if the Bayesian score is above the estimated best cutoff value from minimizing the false positive and false negative rate.

Probability: The estimated probability that the sample is in the positive category. This assumes that the Bayesian score follows a normal distribution and is different from the prediction using a cutoff.

Enrichment: An estimate of enrichment, that is, the increased likelihood (versus random) of this sample being in the category. Bayesian Score: The standard Laplacian-modified Bayesian score.

Mahalanobis Distance: The Mahalanobis distance (MD) is the distance to the center of the training data. The larger the MD, the less trustworthy the prediction.

Mahalanobis Distance p-value: The p-value gives the fraction of training data with an MD greater than or equal to the one for the given sample, assuming normally distributed data. The smaller the p-value, the less trustworthy the prediction. For highly non-normal X properties (e.g., fingerprints), the MD p-value is wildly inaccurate.

## Structural Similar Compounds

| Name               | Anthraquinone, 2-bromo-1,8-diamino-4,5-dihydroxy-                                                                                                                                                                   | Anthraquinone, 1,4,5,8-tetrahydroxy-                                                                                                                 | Anthraquinone, 1,5-diamino-4,8-dihydroxy- |
|--------------------|---------------------------------------------------------------------------------------------------------------------------------------------------------------------------------------------------------------------|------------------------------------------------------------------------------------------------------------------------------------------------------|-------------------------------------------|
| Structure          |                                                                                                                                                                                                                     |                                                                                                                                                      |                                           |
| Actual Endpoint    | Irritant                                                                                                                                                                                                            | Irritant                                                                                                                                             | Non-Irritant                              |
| Predicted Endpoint | Non-Irritant                                                                                                                                                                                                        | Non-Irritant                                                                                                                                         | Non-Irritant                              |
| Distance           | 0.756                                                                                                                                                                                                               | 0.779                                                                                                                                                | 0.786                                     |
| Reference          | 28ZPAK "Sbornik Vysledku Toxikologickeho Vysetreni Latek A Pripravku," Marhol d, J.V., Institut Pro Vychovu Vedoucich Pracovniku Chemickeho Prumyclu Praha, Cechoslovakia, 1972<br>Volume(issue)/page/year: -,244,1 | 85JCAE "Prehled Prumyslove Toxikologie; Organické Latky," Marhold, J., Prague, Czechoslovakia, Avicenum, 1986<br>Volume(issue)/page/year: -,655,1986 | 28ZPAK -,103,72                           |

## Model Applicability

Unknown features are fingerprint features in the query molecule, but not found or appearing too infrequently in the training set.

1. All properties and OPS components are within expected ranges.

## Feature Contribution

### Top features for positive contribution

| Fingerprint | Bit/Smiles | Feature Structure | Score | Irritant in training set |
|-------------|------------|-------------------|-------|--------------------------|
|-------------|------------|-------------------|-------|--------------------------|

|                                        |             |                                                                                                                                                     |        |                          |
|----------------------------------------|-------------|-----------------------------------------------------------------------------------------------------------------------------------------------------|--------|--------------------------|
| FCFP_12                                | 523826990   | 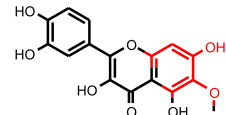<br><chem>[*]O[c]1:[c]([*]):[*]:[c]([*]):[cH]:[c]:1</chem>       | 0.0756 | 6 out of 6               |
| FCFP_12                                | -1678245750 | <br><chem>[*]OC(=C([*]))[c]([*]):[*]:[*]</chem>                  | 0.0583 | 2 out of 2               |
| Top Features for negative contribution |             |                                                                                                                                                     |        |                          |
| Fingerprint                            | Bit/Smiles  | Feature Structure                                                                                                                                   | Score  | Irritant in training set |
| FCFP_12                                | -204034463  | <br><chem>[*][c]1:[*]:[cH]:[c](O):[c](O):[cH]:1</chem>           | -0.222 | 2 out of 3               |
| FCFP_12                                | 949015626   | <br><chem>[*]C(=[*])[c]1:[cH]:[*]:[c]([*]):[c](O):[cH]:1</chem> | -0.222 | 2 out of 3               |
| FCFP_12                                | -548632217  | <br><chem>[*]C(=[*])O</chem>                                   | -0.128 | 49 out of 61             |

# Remdesivir

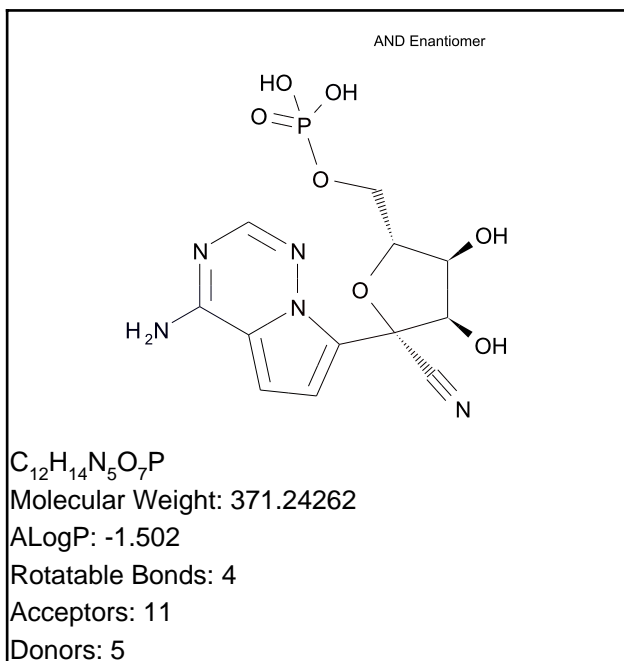

## Model Prediction

**Prediction: Irritant**

Probability: 0.976

Enrichment: 1.06

Bayesian Score: -0.492

Mahalanobis Distance: 13.2

Mahalanobis Distance p-value: 3.18e-008

Prediction: Positive if the Bayesian score is above the estimated best cutoff value from minimizing the false positive and false negative rate.

Probability: The estimated probability that the sample is in the positive category. This assumes that the Bayesian score follows a normal distribution and is different from the prediction using a cutoff.

Enrichment: An estimate of enrichment, that is, the increased likelihood (versus random) of this sample being in the category. Bayesian Score: The standard Laplacian-modified Bayesian score.

Mahalanobis Distance: The Mahalanobis distance (MD) is the distance to the center of the training data. The larger the MD, the less trustworthy the prediction.

Mahalanobis Distance p-value: The p-value gives the fraction of training data with an MD greater than or equal to the one for the given sample, assuming normally distributed data. The smaller the p-value, the less trustworthy the prediction. For highly non-normal X properties (e.g., fingerprints), the MD p-value is wildly inaccurate.

# TOPKAT\_Skin\_Irritancy\_None\_vs\_Irritant

## Structural Similar Compounds

| Name               | 1,3,6-Naphthalenetrisulfonic acid, 7-amino-                                                                                                           | 2,2'-Benzidine disulfonic acid | 2,7-Anthracenedisulfonic acid, 9,10-dihydro-4,5-diamino-9,10-dioxo-1-hydroxy-, disodium salt                                                                                                                          |
|--------------------|-------------------------------------------------------------------------------------------------------------------------------------------------------|--------------------------------|-----------------------------------------------------------------------------------------------------------------------------------------------------------------------------------------------------------------------|
| Structure          |                                                                                                                                                       |                                |                                                                                                                                                                                                                       |
| Actual Endpoint    | Irritant                                                                                                                                              | Non-Irritant                   | Irritant                                                                                                                                                                                                              |
| Predicted Endpoint | Non-Irritant                                                                                                                                          | Non-Irritant                   | Non-Irritant                                                                                                                                                                                                          |
| Distance           | 0.755                                                                                                                                                 | 0.896                          | 1.025                                                                                                                                                                                                                 |
| Reference          | 85JCAE "Prehled Prumyslove Toxikologie; Organické Latky," Marhold, J., Prague, Czechoslovakia, Avicenum, 1986<br>Volume(issue)/page/year: -,1058,1986 | 28ZPAK -,191,72                | 28ZPAK "Sbornik Vysledku Toxikologickeho Vysvetreni Latek A Pripravku," Marhol d, J.V., Institut Pro Vychovu Vedoucic Pracovniku Chemickeho Prumyclu Praha, Cz echoslovakia, 1972<br>Volume(issue)/page/year: -,239,1 |

## Model Applicability

Unknown features are fingerprint features in the query molecule, but not found or appearing too infrequently in the training set.

1. All properties and OPS components are within expected ranges.
2. Unknown FCFP\_2 feature: 472180098: [\*]OP(=O)(O)O
3. Unknown FCFP\_2 feature: -332197802: [\*][c]1:[\*]:[\*]:[c]([\*]):n:1:n:[\*]

## Feature Contribution

### Top features for positive contribution

| Fingerprint | Bit/Smiles | Feature Structure | Score | Irritant in training set |
|-------------|------------|-------------------|-------|--------------------------|
|             |            |                   |       |                          |

|                                        |             |                                                                                                                                                                            |         |                          |
|----------------------------------------|-------------|----------------------------------------------------------------------------------------------------------------------------------------------------------------------------|---------|--------------------------|
| FCFP_12                                | 654335567   | <p>AND Enantiomer</p> 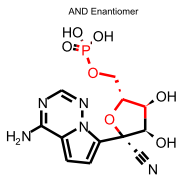 <p>[*][C@H]1[*][*][O][C@@H]<br/>1COP(=O)([*])([*])([*])</p>       | 0.0856  | 29 out of 29             |
| FCFP_12                                | -1539132615 | <p>AND Enantiomer</p>  <p>[*]C([*])([*])[c]1:[c]<br/>H]:[*]:[*]:n:1:[*]</p>             | 0.0795  | 9 out of 9               |
| FCFP_12                                | -1280036918 | <p>AND Enantiomer</p>  <p>[*]C([*])([*])[c]1:[c]<br/>H]:[cH]:[c](:[*]):n:<br/>1:[*]</p> | 0.0772  | 7 out of 7               |
| Top Features for negative contribution |             |                                                                                                                                                                            |         |                          |
| Fingerprint                            | Bit/Smiles  | Feature Structure                                                                                                                                                          | Score   | Irritant in training set |
| FCFP_12                                | 1069584379  | <p>AND Enantiomer</p>  <p>[*]:[c](:[*])N</p>                                           | -0.439  | 38 out of 65             |
| FCFP_12                                | 1618154665  | <p>AND Enantiomer</p>  <p>[*][c](:[*]):[cH]:[c]<br/>([*]):[*]</p>                     | -0.0845 | 412 out of 490           |

|         |    |                                                                                                                                   |         |                |
|---------|----|-----------------------------------------------------------------------------------------------------------------------------------|---------|----------------|
| FCFP_12 | 16 | <p>AND Enantiomer</p> 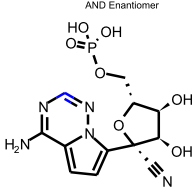 <p>[*][c](:[*]):[*]</p> | -0.0843 | 423 out of 503 |
|---------|----|-----------------------------------------------------------------------------------------------------------------------------------|---------|----------------|

# Patuletin

# TOPKAT\_Carcinogenic\_Potency\_TD50\_Mouse

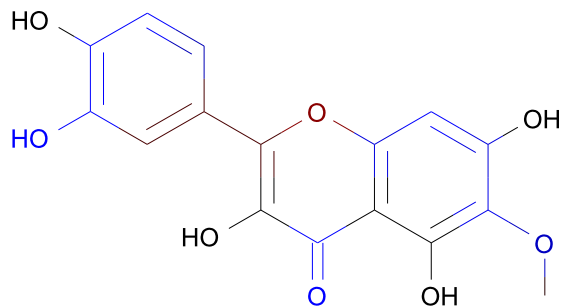

$C_{16}H_{12}O_8$

Molecular Weight: 332.26168

ALogP: 1.614

Rotatable Bonds: 2

Acceptors: 8

Donors: 5

## Model Prediction

Prediction: 66.7

Unit: mg/kg\_body\_weight/day

Mahalanobis Distance: 13

Mahalanobis Distance p-value: 9.47e-008

Mahalanobis Distance: The Mahalanobis distance (MD) is a generalization of the Euclidean distance that accounts for correlations among the X properties. It is calculated as the distance to the center of the training data. The larger the MD, the less trustworthy the prediction.

Mahalanobis Distance p-value: The p-value gives the fraction of training data with an MD greater than or equal to the one for the given sample, assuming normally distributed data. The smaller the p-value, the less trustworthy the prediction. For highly non-normal X properties (e.g., fingerprints), the MD p-value is wildly inaccurate.

## Structural Similar Compounds

| Name                        | Salicylazosulfapyridine | Triamterene | 542     |
|-----------------------------|-------------------------|-------------|---------|
| Structure                   |                         |             |         |
| Actual Endpoint (-log C)    | 2.5034                  | 3.62397     | 4.79932 |
| Predicted Endpoint (-log C) | 3.54214                 | 4.35116     | 3.6353  |
| Distance                    | 0.795                   | 0.797       | 0.812   |
| Reference                   | CPDB                    | CPDB        | CPDB    |

## Model Applicability

Unknown features are fingerprint features in the query molecule, but not found or appearing too infrequently in the training set.

1. All properties and OPS components are within expected ranges.
2. Unknown ECFP\_2 feature: 1796421070: [\*]OC(=C([\*])[\*])[c](:[\*]):[\*]
3. Unknown ECFP\_2 feature: 1793888374: [\*]C(=C(O)C(=[\*])[\*])[\*]

## Feature Contribution

### Top features for positive contribution

| Fingerprint | Bit/Smiles | Feature Structure | Score |
|-------------|------------|-------------------|-------|
| ECFP_6      | 683445015  | <p>[*]O[*]</p>    | 0.136 |



|                                        |            |                                                                                                                                        |        |
|----------------------------------------|------------|----------------------------------------------------------------------------------------------------------------------------------------|--------|
| ECFP_6                                 | -181568884 | 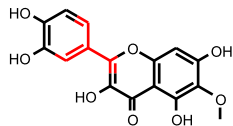<br><chem>[*]C(=[*])[c](:[cH]:[ *]):[cH]:[*]</chem> | 0.0725 |
| ECFP_6                                 | 734603939  | <br><chem>[*]C</chem>                               | 0.0424 |
| Top Features for negative contribution |            |                                                                                                                                        |        |
| Fingerprint                            | Bit/Smiles | Feature Structure                                                                                                                      | Score  |
| ECFP_6                                 | 2106656448 | <br><chem>[*]C(=O)[*]</chem>                        | -0.275 |
| ECFP_6                                 | 2019062761 | <br><chem>[*]:[c](:[*])O</chem>                   | -0.258 |
| ECFP_6                                 | 1996767644 | <br><chem>[*][c](:[*]):[cH]:[cH ]:[*]</chem>      | -0.251 |



# Remdesivir

# TOPKAT\_Carcinogenic\_Potency\_TD50\_Mouse

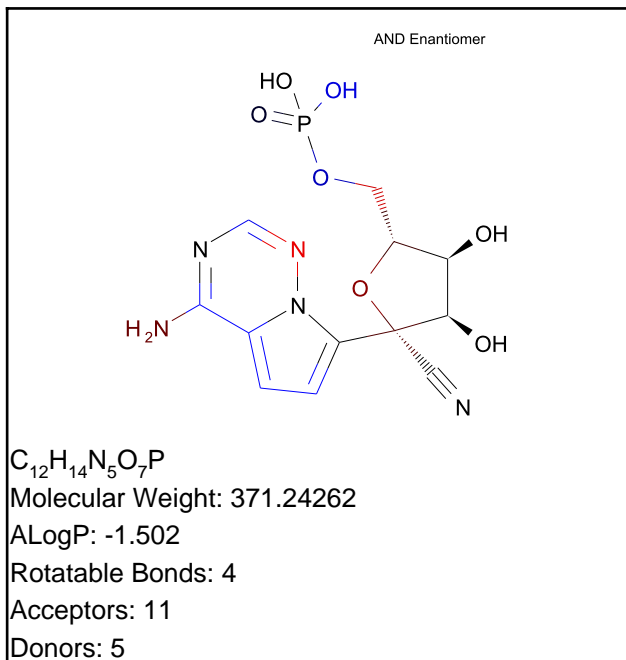

## Model Prediction

Prediction: 9.25

Unit: mg/kg\_body\_weight/day

Mahalanobis Distance: 14

Mahalanobis Distance p-value: 2.59e-010

Mahalanobis Distance: The Mahalanobis distance (MD) is a generalization of the Euclidean distance that accounts for correlations among the X properties. It is calculated as the distance to the center of the training data. The larger the MD, the less trustworthy the prediction.

Mahalanobis Distance p-value: The p-value gives the fraction of training data with an MD greater than or equal to the one for the given sample, assuming normally distributed data. The smaller the p-value, the less trustworthy the prediction. For highly non-normal X properties (e.g., fingerprints), the MD p-value is wildly inaccurate.

## Structural Similar Compounds

| Name                        | 377                                                                                 | (N-6)-(Methylnitroso)adenosine                                                      | 338                                                                                 |
|-----------------------------|-------------------------------------------------------------------------------------|-------------------------------------------------------------------------------------|-------------------------------------------------------------------------------------|
| Structure                   | 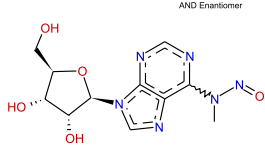 |  |  |
| Actual Endpoint (-log C)    | 4.22928                                                                             | 4.22928                                                                             | 4.39533                                                                             |
| Predicted Endpoint (-log C) | 5.36013                                                                             | 5.36013                                                                             | 4.31268                                                                             |
| Distance                    | 0.852                                                                               | 0.852                                                                               | 0.919                                                                               |
| Reference                   | CPDB                                                                                | CPDB                                                                                | CPDB                                                                                |

## Model Applicability

Unknown features are fingerprint features in the query molecule, but not found or appearing too infrequently in the training set.

1. All properties and OPS components are within expected ranges.
2. Unknown ECFP\_2 feature: 1126642748: [\*]OP(=O)(O)O
3. Unknown ECFP\_2 feature: 2024329577: [\*]P(=O)(O)O
4. Unknown ECFP\_2 feature: -194719409: [\*][C@H]1[\*][\*]C([\*])([\*])O1
5. Unknown ECFP\_2 feature: 1258791451: [\*][C@H]1[\*][\*]O[C@]1(C#[\*])[c]([\*]):[\*]
6. Unknown ECFP\_2 feature: -264833661: [\*]C([\*])([\*])C#N
7. Unknown ECFP\_2 feature: -1507082173: [\*][c]1[\*]:[\*]:[c]([\*]):n:1:n:[\*]
8. Unknown ECFP\_2 feature: -676555381: [\*]:n([\*]):n:c:[\*]
9. Unknown ECFP\_2 feature: -66263742: [\*]C([\*])([\*])[c]1:n([\*]):[\*]:[\*]:c:1

## Feature Contribution

### Top features for positive contribution

| Fingerprint | Bit/Smiles | Feature Structure | Score |
|-------------|------------|-------------------|-------|
|             |            |                   |       |

| ECFP_6                                 | 655739385  | <p>AND Enantiomer</p> 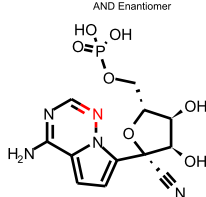 <p>[*]:n:[*]</p>                         | 0.229  |
|----------------------------------------|------------|----------------------------------------------------------------------------------------------------------------------------------------------------|--------|
| ECFP_6                                 | 1572579716 | <p>AND Enantiomer</p>  <p>[*]N</p>                              | 0.225  |
| ECFP_6                                 | 1559650422 | <p>AND Enantiomer</p>  <p>[*]C[*]</p>                           | 0.203  |
| Top Features for negative contribution |            |                                                                                                                                                    |        |
| Fingerprint                            | Bit/Smiles | Feature Structure                                                                                                                                  | Score  |
| ECFP_6                                 | 1996767644 | <p>AND Enantiomer</p>  <p>[*][c](:[*]):[cH]:[cH]:[cH]:[*]</p> | -0.251 |
| ECFP_6                                 | 642810091  | <p>AND Enantiomer</p>  <p>[*][c](:[*]):[*]</p>                | -0.247 |

|        |           |                                           |       |
|--------|-----------|-------------------------------------------|-------|
| ECFP_6 | 182236392 | <p>AND Enantiomer</p> <p>[*]:[cH]:[*]</p> | 0.232 |
|--------|-----------|-------------------------------------------|-------|

# Patuletin

# TOPKAT\_Carcinogenic\_Potency\_TD50\_Rat

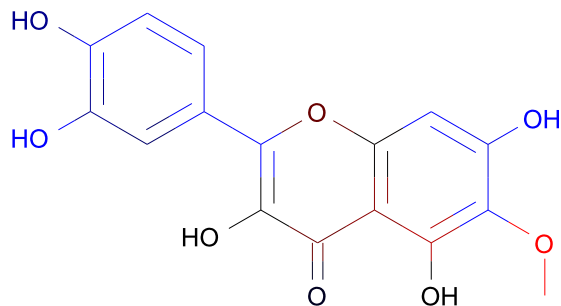

$C_{16}H_{12}O_8$

Molecular Weight: 332.26168

ALogP: 1.614

Rotatable Bonds: 2

Acceptors: 8

Donors: 5

## Model Prediction

Prediction: 7.46

Unit: mg/kg\_body\_weight/day

Mahalanobis Distance: 10.8

Mahalanobis Distance p-value: 0.0373

Mahalanobis Distance: The Mahalanobis distance (MD) is a generalization of the Euclidean distance that accounts for correlations among the X properties. It is calculated as the distance to the center of the training data. The larger the MD, the less trustworthy the prediction.

Mahalanobis Distance p-value: The p-value gives the fraction of training data with an MD greater than or equal to the one for the given sample, assuming normally distributed data. The smaller the p-value, the less trustworthy the prediction. For highly non-normal X properties (e.g., fingerprints), the MD p-value is wildly inaccurate.

## Structural Similar Compounds

| Name                        | Quercetin | Hematoxylin | 454     |
|-----------------------------|-----------|-------------|---------|
| Structure                   |           |             |         |
| Actual Endpoint (-log C)    | 4.47602   | 2.48041     | 2.48041 |
| Predicted Endpoint (-log C) | 3.79194   | 4.42178     | 4.42178 |
| Distance                    | 0.258     | 0.616       | 0.616   |
| Reference                   | CPDB      | CPDB        | CPDB    |

## Model Applicability

Unknown features are fingerprint features in the query molecule, but not found or appearing too infrequently in the training set.

1. All properties and OPS components are within expected ranges.

## Feature Contribution

### Top features for positive contribution

| Fingerprint | Bit/Smiles | Feature Structure | Score |
|-------------|------------|-------------------|-------|
| FCFP_6      | 136627117  | <br>[*]OC         | 0.69  |

|                                        |            |                                                                                                                                               |        |
|----------------------------------------|------------|-----------------------------------------------------------------------------------------------------------------------------------------------|--------|
| FCFP_6                                 | 1          | 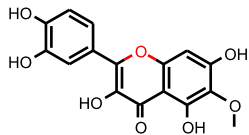<br><chem>[*]O[*]</chem>                                   | 0.234  |
| FCFP_6                                 | 203677720  | <br><chem>[*]C(=[*])[c](:[c]([*]):[*]):[c]([*]):[*]</chem> | 0.137  |
| Top Features for negative contribution |            |                                                                                                                                               |        |
| Fingerprint                            | Bit/Smiles | Feature Structure                                                                                                                             | Score  |
| FCFP_6                                 | 7          | <br><chem>[*]O</chem>                                      | -0.372 |
| FCFP_6                                 | 16         | <br><chem>[*][c](:[*]):[*]</chem>                        | -0.354 |
| FCFP_6                                 | 74595001   | <br><chem>[*][c](:[*]):[c](O):[cH]:[*]</chem>            | -0.267 |





# Remdesivir

# TOPKAT\_Carcinogenic\_Potency\_TD50\_Rat

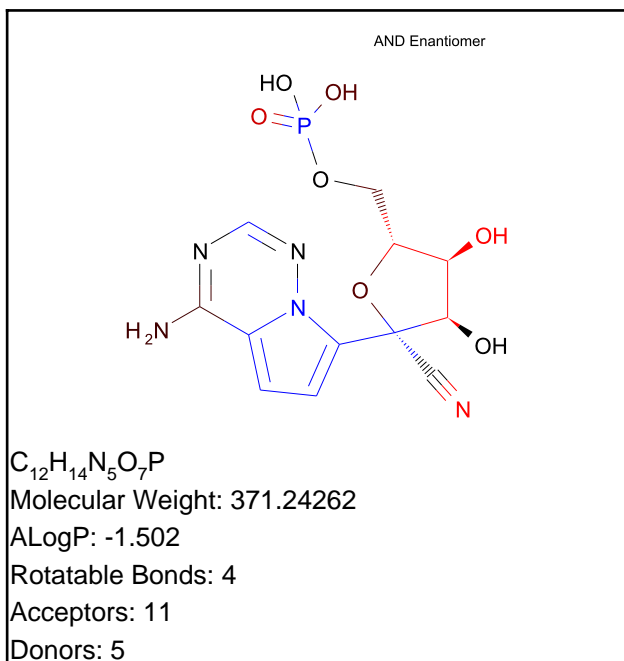

## Model Prediction

Prediction: 1.01

Unit: mg/kg\_body\_weight/day

Mahalanobis Distance: 16.2

Mahalanobis Distance p-value: 4.38e-015

Mahalanobis Distance: The Mahalanobis distance (MD) is a generalization of the Euclidean distance that accounts for correlations among the X properties. It is calculated as the distance to the center of the training data. The larger the MD, the less trustworthy the prediction.

Mahalanobis Distance p-value: The p-value gives the fraction of training data with an MD greater than or equal to the one for the given sample, assuming normally distributed data. The smaller the p-value, the less trustworthy the prediction. For highly non-normal X properties (e.g., fingerprints), the MD p-value is wildly inaccurate.

## Structural Similar Compounds

| Name                        | b-Thioguanine deoxyriboside                                                         | Hexamethylmelamine                                                                  | 604                                                                                 |
|-----------------------------|-------------------------------------------------------------------------------------|-------------------------------------------------------------------------------------|-------------------------------------------------------------------------------------|
| Structure                   | 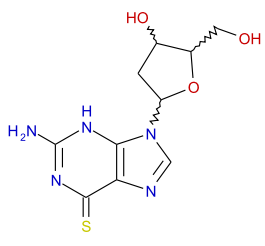 |  |  |
| Actual Endpoint (-log C)    | 5.13004                                                                             | 4.47751                                                                             | 5.13004                                                                             |
| Predicted Endpoint (-log C) | 4.82552                                                                             | 3.76275                                                                             | 4.96687                                                                             |
| Distance                    | 0.805                                                                               | 0.832                                                                               | 0.835                                                                               |
| Reference                   | CPDB                                                                                | CPDB                                                                                | CPDB                                                                                |

## Model Applicability

Unknown features are fingerprint features in the query molecule, but not found or appearing too infrequently in the training set.

1. All properties and OPS components are within expected ranges.
2. Unknown FCFP\_2 feature: 472180098: [\*]OP(=O)(O)O
3. Unknown FCFP\_2 feature: -836603894: [\*][C@ @H]1[\*][\*]O[C@]1(C#[\*])[c](:[\*]):[\*]

## Feature Contribution

### Top features for positive contribution

| Fingerprint | Bit/Smiles  | Feature Structure                                                                                                                      | Score |
|-------------|-------------|----------------------------------------------------------------------------------------------------------------------------------------|-------|
| FCFP_6      | -1043250487 | 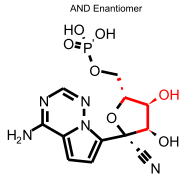<br><chem>[*][C@H]1[*][*][C@H]([*])[C@H]1O</chem> | 1.15  |

|                                        |             |                                                                                                                                                                |        |
|----------------------------------------|-------------|----------------------------------------------------------------------------------------------------------------------------------------------------------------|--------|
| FCFP_6                                 | 9           | <p>AND Enantiomer</p> 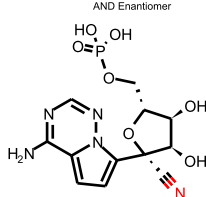 <p>[*]#N</p>                                         | 0.385  |
| FCFP_6                                 | 1           | <p>AND Enantiomer</p>  <p>[*]O[*]</p>                                       | 0.234  |
| Top Features for negative contribution |             |                                                                                                                                                                |        |
| Fingerprint                            | Bit/Smiles  | Feature Structure                                                                                                                                              | Score  |
| FCFP_6                                 | -1280036918 | <p>AND Enantiomer</p>  <p>[*]C([*])([*])[c]1:[cH]:[cH]:[c]([*]):n:1:[*]</p> | -0.363 |
| FCFP_6                                 | 16          | <p>AND Enantiomer</p>  <p>[*][c](:[*]):[*]</p>                            | -0.354 |
| FCFP_6                                 | 17          | <p>AND Enantiomer</p>  <p>[*]:n(:[*]):[*]</p>                             | -0.149 |



# Patuletin

# TOPKAT\_Chronic\_LOAEL

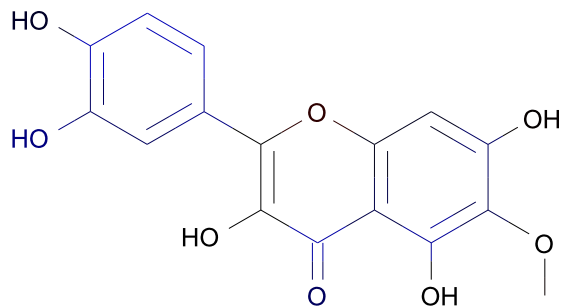

$C_{16}H_{12}O_8$

Molecular Weight: 332.26168

ALogP: 1.614

Rotatable Bonds: 2

Acceptors: 8

Donors: 5

## Model Prediction

Prediction: 0.189

Unit: g/kg\_body\_weight

Mahalanobis Distance: 19.2

Mahalanobis Distance p-value: 5.07e-006

Mahalanobis Distance: The Mahalanobis distance (MD) is a generalization of the Euclidean distance that accounts for correlations among the X properties. It is calculated as the distance to the center of the training data. The larger the MD, the less trustworthy the prediction.

Mahalanobis Distance p-value: The p-value gives the fraction of training data with an MD greater than or equal to the one for the given sample, assuming normally distributed data. The smaller the p-value, the less trustworthy the prediction. For highly non-normal X properties (e.g., fingerprints), the MD p-value is wildly inaccurate.

## Structural Similar Compounds

| Name                        | QUERCETIN  | OLSALAZINE.NA | C.I. DISPERSE BLUE I |
|-----------------------------|------------|---------------|----------------------|
| Structure                   |            |               |                      |
| Actual Endpoint (-log C)    | 2.87829    | 3.17932       | 3.6327               |
| Predicted Endpoint (-log C) | 3.12498    | 2.89417       | 3.26657              |
| Distance                    | 0.255      | 0.577         | 0.707                |
| Reference                   | NTP 409 79 | NDA-19715     | NTP REPORT # 299     |

## Model Applicability

Unknown features are fingerprint features in the query molecule, but not found or appearing too infrequently in the training set.

1. All properties and OPS components are within expected ranges.
2. Unknown ECFP\_6 feature: -1531301414: [\*]O[c](:[c]([\*]):[\*]):[c]([\*]):[\*]
3. Unknown ECFP\_6 feature: -570915357: [\*]O[c](:[cH]([\*]):[\*]):[c]([\*]):[\*]
4. Unknown ECFP\_6 feature: -813997308: [\*]C(=[\*])[c](:[c]([\*]):[\*]):[c]([\*]):[\*]
5. Unknown ECFP\_6 feature: -1660913849: [\*][c](:[\*]):[c](O):[c]([\*]):[\*]
6. Unknown ECFP\_6 feature: -560785749: [\*]C(=[\*])O[c](:[\*]):[\*]
7. Unknown ECFP\_6 feature: 1796421070: [\*]OC(=C([\*])[\*])[c](:[\*]):[\*]
8. Unknown ECFP\_6 feature: 1793888374: [\*]C(=C(O)C(=[\*])[\*])[\*]
9. Unknown ECFP\_6 feature: 1717462980: [\*]C(=[\*])C(=O)[c](:[\*]):[\*]
10. Unknown ECFP\_6 feature: -181568884: [\*]C(=[\*])[c](:[cH]([\*]):[\*]):[cH]:[\*]
11. Unknown ECFP\_6 feature: 2019062761: [\*]:[c](:[\*])O
12. Unknown ECFP\_6 feature: 1307307440: [\*]:[c](:[\*])OC

## Feature Contribution

### Top features for positive contribution

| Fingerprint | Bit/Smiles | Feature Structure | Score |
|-------------|------------|-------------------|-------|
|             |            |                   |       |

|                                        |            |                                                                                                                                               |        |
|----------------------------------------|------------|-----------------------------------------------------------------------------------------------------------------------------------------------|--------|
| ECFP_6                                 | 683445015  | 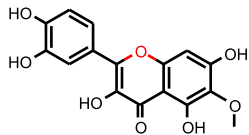<br><chem>[*]O[*]</chem>                                   | 0.0734 |
| FCFP_6                                 | 1036089772 | <br><chem>[*]C(=[*])O[c](:[*]):</chem><br><chem>[*]</chem> | 0.073  |
| FCFP_6                                 | 136627117  | <br><chem>[*]OC</chem>                                     | 0.0538 |
| Top Features for negative contribution |            |                                                                                                                                               |        |
| Fingerprint                            | Bit/Smiles | Feature Structure                                                                                                                             | Score  |
| ECFP_6                                 | 2106656448 | <br><chem>[*]C(=O)[*]</chem>                             | -0.11  |
| FCFP_6                                 | 1          | <br><chem>[*]O[*]</chem>                                 | -0.102 |

|        |           |                                                                                                                                                  |        |
|--------|-----------|--------------------------------------------------------------------------------------------------------------------------------------------------|--------|
| FCFP_6 | 453677277 | 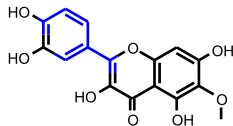<br><chem>[*]C(=[*])[c]1:[cH]:[*]:[c]([*]):[cH]:[cH]:1</chem> | 0.0906 |
|--------|-----------|--------------------------------------------------------------------------------------------------------------------------------------------------|--------|

# Remdesivir

# TOPKAT\_Chronic\_LOAEL

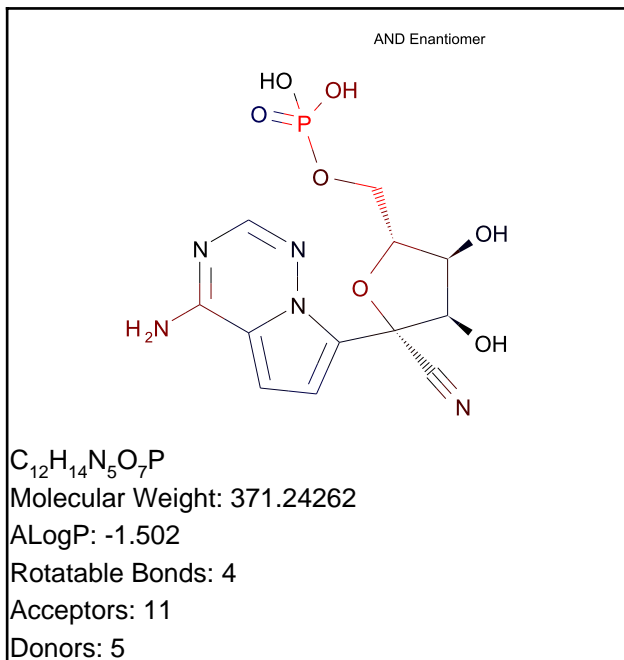

## Model Prediction

Prediction: 0.00379

Unit: g/kg\_body\_weight

Mahalanobis Distance: 47.7

Mahalanobis Distance p-value: 2.93e-054

Mahalanobis Distance: The Mahalanobis distance (MD) is a generalization of the Euclidean distance that accounts for correlations among the X properties. It is calculated as the distance to the center of the training data. The larger the MD, the less trustworthy the prediction.

Mahalanobis Distance p-value: The p-value gives the fraction of training data with an MD greater than or equal to the one for the given sample, assuming normally distributed data. The smaller the p-value, the less trustworthy the prediction. For highly non-normal X properties (e.g., fingerprints), the MD p-value is wildly inaccurate.

## Structural Similar Compounds

| Name                        | TETRACYCLINE .HCL                                                                   | 4;4'-DIAMINO-2;2'-STILBENEDIS                                                       | OXYTETRACYCLINE .HCL                                                                |
|-----------------------------|-------------------------------------------------------------------------------------|-------------------------------------------------------------------------------------|-------------------------------------------------------------------------------------|
| Structure                   | 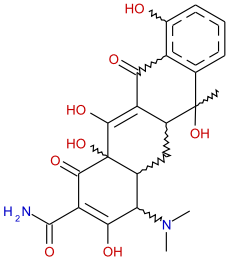 |  |  |
| Actual Endpoint (-log C)    | 2.85193                                                                             | 2.47175                                                                             | 2.56626                                                                             |
| Predicted Endpoint (-log C) | 3.94748                                                                             | 3.53715                                                                             | 3.75581                                                                             |
| Distance                    | 0.746                                                                               | 0.746                                                                               | 0.802                                                                               |
| Reference                   | NTP REPORT # 344                                                                    | NTP 412 82                                                                          | NTP REPORT # 315                                                                    |

## Model Applicability

Unknown features are fingerprint features in the query molecule, but not found or appearing too infrequently in the training set.

1. All properties and OPS components are within expected ranges.
2. Unknown FCFP\_2 feature: 472180098: [\*]OP(=O)(O)O
3. Unknown FCFP\_2 feature: -332197802: [\*][c]1:[\*]:[\*]:[c]([\*]):n:1:n:[\*]
4. Unknown ECFP\_6 feature: -1114776580: [\*]C#[\*]
5. Unknown ECFP\_6 feature: -1101847286: [\*]#N
6. Unknown ECFP\_6 feature: 672362763: [\*]:n([\*]):[\*]
7. Unknown ECFP\_6 feature: 1126642748: [\*]OP(=O)(O)O
8. Unknown ECFP\_6 feature: 2100964382: [\*]P(=O)([\*])[\*]
9. Unknown ECFP\_6 feature: 2024329577: [\*]P(=[\*])([\*])O
10. Unknown ECFP\_6 feature: -1250439909: [\*]COP(=[\*])([\*])[\*]
11. Unknown ECFP\_6 feature: -1687549011: [\*]OCC([\*])[\*]
12. Unknown ECFP\_6 feature: -194719409: [\*][C@ @H]1[\*][\*]C([\*])([\*])O1
13. Unknown ECFP\_6 feature: -553149446: [\*]C[C@H]1O[\*][\*][C@ @H]1[\*]
14. Unknown ECFP\_6 feature: 305695353: [\*][C@H]1[\*][\*][C@H]([\*])[C@H]1O
15. Unknown ECFP\_6 feature: -521596699: [\*][C@ @H]1[\*][\*]C([\*])([\*])[C@ @H]1O
16. Unknown ECFP\_6 feature: 1258791451: [\*][C@ @H]1[\*][\*]O[C@]1(C#[\*])[c]([\*]):[\*]:[\*]
17. Unknown ECFP\_6 feature: 2024749573: [\*]C([\*])O
18. Unknown ECFP\_6 feature: -264833661: [\*]C([\*])([\*])C#N
19. Unknown ECFP\_6 feature: 1412053881: [\*]C#N

20. Unknown ECFP\_6 feature: -1507082173: [\*][c]1:[\*]:[\*]:[c](:[\*]):n:1:n:[\*]
21. Unknown ECFP\_6 feature: -676555381: [\*]:[cH]:n:n(:[\*]):[\*]
22. Unknown ECFP\_6 feature: -710237522: [\*]:n:[cH]:n:[\*]
23. Unknown ECFP\_6 feature: -677309799: [\*][c](:[\*]):n:[cH]:[\*]
24. Unknown ECFP\_6 feature: -1734834311: [\*]:n:[c](N):[c](:[\*]):[\*]
25. Unknown ECFP\_6 feature: 1334415134: [\*][c](:[\*]):[c]1:[cH]:[\*]:[\*]:n:1:[\*]
26. Unknown ECFP\_6 feature: -66263742: [\*]C([\*])([\*])[c]1:[cH]:[\*]:[\*]:n:1:[\*]
27. Unknown ECFP\_6 feature: -938530932: [\*]:[c](:[\*])N

## Feature Contribution

### Top features for positive contribution

| Fingerprint | Bit/Smiles  | Feature Structure                                                                                                                      | Score |
|-------------|-------------|----------------------------------------------------------------------------------------------------------------------------------------|-------|
| ECFP_6      | -167460056  | <p>AND Enantiomer</p> 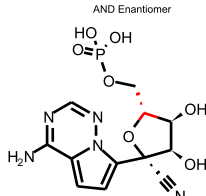 <p>[*]C([*])[*]</p>          | 0.136 |
| FCFP_6      | -1143715940 | <p>AND Enantiomer</p>  <p>[*]COP(=[*])([*])[*]</p> | 0.13  |
| ECFP_6      | 1559650422  | <p>AND Enantiomer</p>  <p>[*]C[*]</p>             | 0.129 |

### Top Features for negative contribution

| Fingerprint | Bit/Smiles | Feature Structure | Score |
|-------------|------------|-------------------|-------|
|             |            |                   |       |



|        |            |                                                                                                                                                     |         |
|--------|------------|-----------------------------------------------------------------------------------------------------------------------------------------------------|---------|
| FCFP_6 | 1          | <div>AND Enantiomer</div> 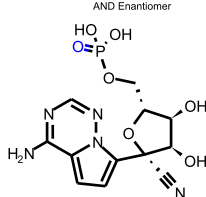 <div>[*]O[*]</div>                    | -0.102  |
| ECFP_6 | 1996767644 | <div>AND Enantiomer</div>  <div>[*][c](:[*]):[cH]:[cH]:[*]</div> | -0.0497 |
| FCFP_6 | 16         | <div>AND Enantiomer</div>  <div>[*][c](:[*]):[*]</div>           | -0.0462 |

# Patuletin

# TOPKAT\_Rat\_Maximum\_Tolerated\_Dose\_Feed

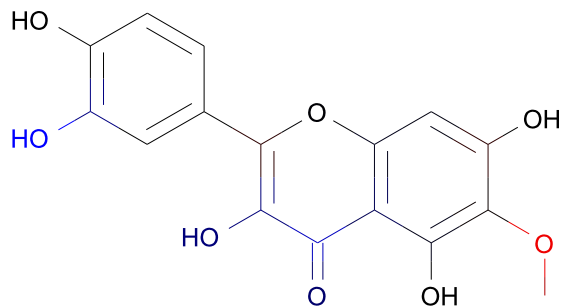

$C_{16}H_{12}O_8$

Molecular Weight: 332.26168

ALogP: 1.614

Rotatable Bonds: 2

Acceptors: 8

Donors: 5

## Model Prediction

Prediction: 1.06

Unit: g/kg\_body\_weight

Mahalanobis Distance: 8.52

Mahalanobis Distance p-value: 0.00606

Mahalanobis Distance: The Mahalanobis distance (MD) is a generalization of the Euclidean distance that accounts for correlations among the X properties. It is calculated as the distance to the center of the training data. The larger the MD, the less trustworthy the prediction.

Mahalanobis Distance p-value: The p-value gives the fraction of training data with an MD greater than or equal to the one for the given sample, assuming normally distributed data. The smaller the p-value, the less trustworthy the prediction. For highly non-normal X properties (e.g., fingerprints), the MD p-value is wildly inaccurate.

## Structural Similar Compounds

| Name                        | QUERCETIN      | 50%1,4,5,8-TETRAAMINOANTHRAQUIONONE + DERIVATIVES | 4,4'-DIAMINO-2,2'-STILBENEDISULFONIC ACID.2NaSALT |
|-----------------------------|----------------|---------------------------------------------------|---------------------------------------------------|
| Structure                   |                |                                                   |                                                   |
| Actual Endpoint (-log C)    | 2.2016         | 3.0764                                            | 2.50759                                           |
| Predicted Endpoint (-log C) | 2.27782        | 3.08142                                           | 3.26068                                           |
| Distance                    | 0.149          | 0.686                                             | 0.731                                             |
| Reference                   | NCI/NTP TR-409 | NCI/NTP TR-299                                    | NCI/NTP TR-412                                    |

## Model Applicability

Unknown features are fingerprint features in the query molecule, but not found or appearing too infrequently in the training set.

1. All properties and OPS components are within expected ranges.

## Feature Contribution

| Top features for positive contribution |            |                   |       |
|----------------------------------------|------------|-------------------|-------|
| Fingerprint                            | Bit/Smiles | Feature Structure | Score |
| FCFP_2                                 | 136627117  | <br>[*]OC         | 0.173 |

|                                        |            |                                                                                                                                         |        |
|----------------------------------------|------------|-----------------------------------------------------------------------------------------------------------------------------------------|--------|
| FCFP_2                                 | 1036089772 | 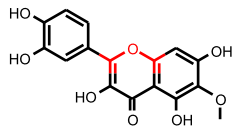<br><chem>[*]C(=[*])O[c](:[*]):[*]</chem>            | 0.0749 |
| FCFP_2                                 | 332760439  | <br><chem>[*]O[c](:[c]([*]):[*]):[c]([*]):[*]</chem> | 0.0611 |
| Top Features for negative contribution |            |                                                                                                                                         |        |
| Fingerprint                            | Bit/Smiles | Feature Structure                                                                                                                       | Score  |
| FCFP_2                                 | 7          | <br><chem>[*]O</chem>                                | -0.214 |
| FCFP_2                                 | -549108873 | <br><chem>[*]:[c](:[*])O</chem>                    | -0.127 |
| FCFP_2                                 | -548632217 | <br><chem>[*]C(=[*])O</chem>                       | -0.119 |



# Remdesivir

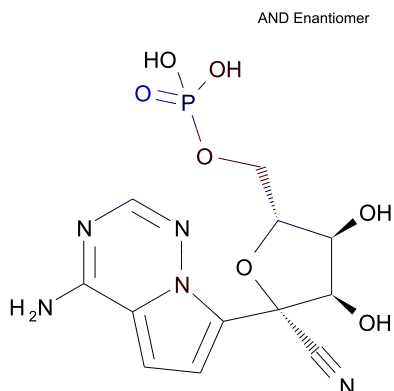
$$\text{C}_{12}\text{H}_{14}\text{N}_5\text{O}_7\text{P}$$

Molecular Weight: 371.24262

|ALogP: -1.502

Rotatable Bonds: 4

Acceptors: 11

Donors: 5

## Model Prediction

Prediction: 0.235

Unit: g/kg\_body\_weight

Mahalanobis Distance: 9.52

Mahalanobis Distance p-value: 0.000247

**Mahalanobis Distance:** The Mahalanobis distance (MD) is a generalization of the Euclidean distance that accounts for correlations among the X properties. It is calculated as the distance to the center of the training data. The larger the MD, the less trustworthy the prediction.

Mahalanobis Distance p-value: The p-value gives the fraction of training data with an MD greater than or equal to the one for the given sample, assuming normally distributed data. The smaller the p-value, the less trustworthy the prediction. For highly non-normal X properties (e.g., fingerprints), the MD p-value is wildly inaccurate.

## TOPKAT Rat Maximum Tolerated Dose Feed

## Structural Similar Compounds

| Name                        | 4,4'-DIAMINO-2,2'-STILBENEDISULFONIC ACID.2NaSALT | OXYTETRACYCLINE | 50%1,4,5,8-TETRAAMINOANTHRAQUINONE + DERIVATIVES |
|-----------------------------|---------------------------------------------------|-----------------|--------------------------------------------------|
| Structure                   |                                                   |                 |                                                  |
| Actual Endpoint (-log C)    | 2.50759                                           | 2.36214         | 3.0764                                           |
| Predicted Endpoint (-log C) | 3.26068                                           | 2.77834         | 3.08142                                          |
| Distance                    | 0.743                                             | 0.818           | 0.989                                            |
| Reference                   | NCI/NTP TR-412                                    | NCI/NTP TR-315  | NCI/NTP TR-299                                   |

## Model Applicability

Unknown features are fingerprint features in the query molecule, but not found or appearing too infrequently in the training set.

1. Molecular\_PolarSurfaceArea out of range. Value: 206.26. Training min, max, mean, SD: 0, 201.84, 63.052, 40.7.
2. Unknown FCFP\_2 feature: 472180098: [\*]OP(=O)(O)O
3. Unknown FCFP\_2 feature: -836603894: [\*][C@@H]1[\*][\*]O[C@]1(C#[\*])[c](:[\*]):[\*]
4. Unknown FCFP\_2 feature: -1277879912: [\*]C([\*])([\*])C#N
5. Unknown FCFP\_2 feature: -332197802: [\*][c]1:[\*]:[\*]:[c](:[\*]):n:1:n:[\*]
6. Unknown FCFP\_2 feature: -124685461: [\*]:n:c:n:[\*]

## Feature Contribution

### Top features for positive contribution

| Fingerprint | Bit/Smiles | Feature Structure | Score |
|-------------|------------|-------------------|-------|
|             |            |                   |       |

|                                        |             |                                                                                                                                       |         |
|----------------------------------------|-------------|---------------------------------------------------------------------------------------------------------------------------------------|---------|
| FCFP_2                                 | -1143715940 | <p>AND Enantiomer</p> 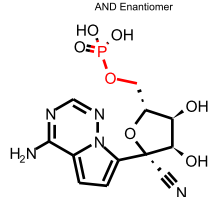 <p>[*]COP(=[*])([*])[*]</p> | 0.095   |
| FCFP_2                                 | 3           | <p>AND Enantiomer</p>  <p>[*]O</p>                 | 0.0737  |
| FCFP_2                                 | 17          | <p>AND Enantiomer</p>  <p>[*]:n(:[*]):[*]</p>      | 0.0441  |
| Top Features for negative contribution |             |                                                                                                                                       |         |
| Fingerprint                            | Bit/Smiles  | Feature Structure                                                                                                                     | Score   |
| FCFP_2                                 | 1872154524  | <p>AND Enantiomer</p>  <p>[*]C(=O)[*]</p>         | -0.105  |
| FCFP_2                                 | 1           | <p>AND Enantiomer</p>  <p>[*]O[*]</p>            | -0.0796 |

FCFP\_2

16

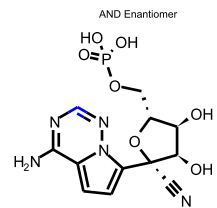

[\*][c](:[\*]):[\*]

-0.0512

# Patuletin

# TOPKAT\_Rat\_Maximum\_Tolerated\_Dose\_Gavage

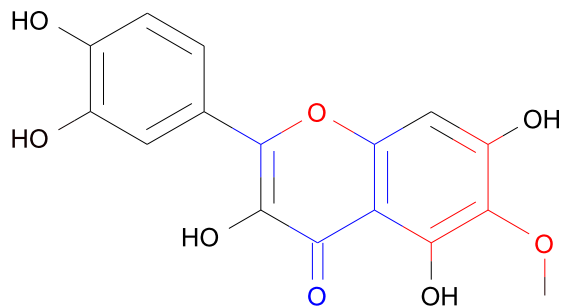

$C_{16}H_{12}O_8$

Molecular Weight: 332.26168

ALogP: 1.614

Rotatable Bonds: 2

Acceptors: 8

Donors: 5

## Model Prediction

Prediction: 0.000111

Unit: g/kg\_body\_weight

Mahalanobis Distance: 17.3

Mahalanobis Distance p-value: 4.62e-016

Mahalanobis Distance: The Mahalanobis distance (MD) is a generalization of the Euclidean distance that accounts for correlations among the X properties. It is calculated as the distance to the center of the training data. The larger the MD, the less trustworthy the prediction.

Mahalanobis Distance p-value: The p-value gives the fraction of training data with an MD greater than or equal to the one for the given sample, assuming normally distributed data. The smaller the p-value, the less trustworthy the prediction. For highly non-normal X properties (e.g., fingerprints), the MD p-value is wildly inaccurate.

## Structural Similar Compounds

| Name                        | OCHRATOXIN     | AMPICILLIN TRIHYDRATE | HC RED 3       |
|-----------------------------|----------------|-----------------------|----------------|
| Structure                   |                |                       |                |
| Actual Endpoint (-log C)    | 6.28396        | 2.36724               | 2.59592        |
| Predicted Endpoint (-log C) | 5.12358        | 2.27651               | 3.285          |
| Distance                    | 0.926          | 1.070                 | 1.091          |
| Reference                   | NCI/NTP TR-358 | NCI/NTP TR-318        | NCI/NTP TR-281 |

## Model Applicability

Unknown features are fingerprint features in the query molecule, but not found or appearing too infrequently in the training set.

1. Num\_H\_Donors out of range. Value: 5. Training min, max, mean, SD: 0, 3, 0.4375, 0.8311.
2. Num\_H\_Acceptors out of range. Value: 8. Training min, max, mean, SD: 0, 6, 1.6146, 1.644.
3. Molecular\_PolarSASA out of range. Value: 233.06. Training min, max, mean, SD: 0, 223.97, 50.816, 55.15.
4. OPS\_PC1 out of range. Value: 8.81. Training min, max, SD, explained variance: -4.0008, 7.9165, 2.861, 0.2531.
5. OPS\_PC9 out of range. Value: 3.4228. Training min, max, SD, explained variance: -2.7086, 2.9267, 1.019, 0.0321.
6. Unknown FCFP\_2 feature: -1678245750: [\*]OC(=C([\*])[\*])[c](:[\*]):[\*]
7. Unknown FCFP\_2 feature: -1305924292: [\*]C(=C(O)C(=[\*])[\*])[\*]
8. Unknown FCFP\_2 feature: -1549192822: [\*]C(=[\*])C(=O)[c](:[\*]):[\*]

## Feature Contribution

### Top features for positive contribution

| Fingerprint | Bit/Smiles | Feature Structure | Score |
|-------------|------------|-------------------|-------|
|             |            |                   |       |



|                                        |            |                                                                                                                                                 |        |
|----------------------------------------|------------|-------------------------------------------------------------------------------------------------------------------------------------------------|--------|
| FCFP_2                                 | 332760439  | 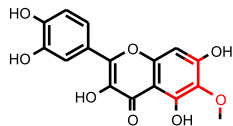<br><chem>[*]O[c](:[c]([*]):[*]):[c]([*]):[*])</chem>        | 0.672  |
| FCFP_2                                 | 1          | <br><chem>[*]O[*]</chem>                                     | 0.511  |
| FCFP_2                                 | 136627117  | <br><chem>[*]OC</chem>                                       | 0.0304 |
| Top Features for negative contribution |            |                                                                                                                                                 |        |
| Fingerprint                            | Bit/Smiles | Feature Structure                                                                                                                               | Score  |
| FCFP_2                                 | 203677720  | <br><chem>[*]C(=[*])[c](:[c]([*]):[*]):[c]([*]):[*]</chem> | -0.406 |
| FCFP_2                                 | 1872154524 | <br><chem>[*]C(=O)[*]</chem>                               | -0.307 |

|        |   |                                                                                                                   |       |
|--------|---|-------------------------------------------------------------------------------------------------------------------|-------|
| FCFP_2 | 0 | 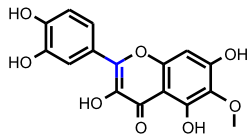<br><chem>[*]C(=[*])[*]</chem> | -0.29 |
|--------|---|-------------------------------------------------------------------------------------------------------------------|-------|

# Remdesivir

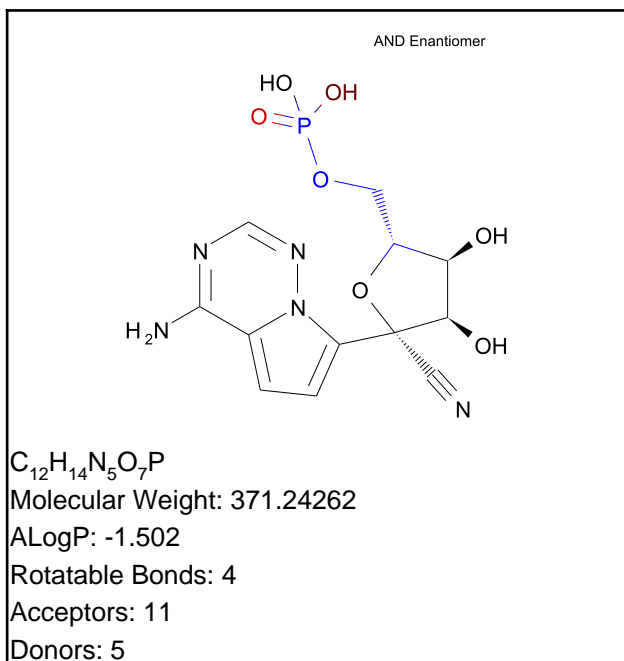

## Model Prediction

Prediction: 0.000298

Unit: g/kg\_body\_weight

Mahalanobis Distance: 17.2

Mahalanobis Distance p-value: 5.05e-016

Mahalanobis Distance: The Mahalanobis distance (MD) is a generalization of the Euclidean distance that accounts for correlations among the X properties. It is calculated as the distance to the center of the training data. The larger the MD, the less trustworthy the prediction.

Mahalanobis Distance p-value: The p-value gives the fraction of training data with an MD greater than or equal to the one for the given sample, assuming normally distributed data. The smaller the p-value, the less trustworthy the prediction. For highly non-normal X properties (e.g., fingerprints), the MD p-value is wildly inaccurate.

# TOPKAT\_Rat\_Maximum\_Tolerated\_Dose\_Gavage

## Structural Similar Compounds

| Name                        | AMPICILLIN TRIHYDRATE                                                               | OCHRATOXIN                                                                          | PENICILLIN VK                                                                       |
|-----------------------------|-------------------------------------------------------------------------------------|-------------------------------------------------------------------------------------|-------------------------------------------------------------------------------------|
| Structure                   | 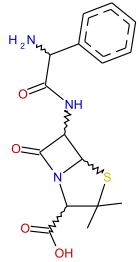 |  |  |
| Actual Endpoint (-log C)    | 2.36724                                                                             | 6.28396                                                                             | 2.54455                                                                             |
| Predicted Endpoint (-log C) | 2.27651                                                                             | 5.12358                                                                             | 3.9702                                                                              |
| Distance                    | 1.255                                                                               | 1.482                                                                               | 1.498                                                                               |
| Reference                   | NCI/NTP TR-318                                                                      | NCI/NTP TR-358                                                                      | NCI/NTP TR-336                                                                      |

## Model Applicability

Unknown features are fingerprint features in the query molecule, but not found or appearing too infrequently in the training set.

- Num\_H\_Donors out of range. Value: 5. Training min, max, mean, SD: 0, 3, 0.4375, 0.8311.
- Num\_H\_Acceptors out of range. Value: 11. Training min, max, mean, SD: 0, 6, 1.6146, 1.644.
- Molecular\_PolarSASA out of range. Value: 321.97. Training min, max, mean, SD: 0, 223.97, 50.816, 55.15.
- Molecular\_PolarSurfaceArea out of range. Value: 206.26. Training min, max, mean, SD: 0, 138.03, 28.978, 32.1.
- OPS PC1 out of range. Value: 9.0116. Training min, max, SD, explained variance: -4.0008, 7.9165, 2.861, 0.2531.
- OPS PC5 out of range. Value: -4.1876. Training min, max, SD, explained variance: -3.4, 4.1587, 1.489, 0.0686.
- OPS PC9 out of range. Value: -2.7276. Training min, max, SD, explained variance: -2.7086, 2.9267, 1.019, 0.0321.
- Unknown FCFP\_2 feature: 472180098: [\*]OP(=O)(O)O
- Unknown FCFP\_2 feature: -836603894: [\*][C@@H]1[\*][\*]O[C@]1(C#[\*])[c](:[\*]):[\*]
- Unknown FCFP\_2 feature: -1277879912: [\*]C([\*])([\*])C#N
- Unknown FCFP\_2 feature: -1362791977: [\*]C#N
- Unknown FCFP\_2 feature: -332197802: [\*][c]1:[\*]:[\*]:[c](:[\*]):n:1:n:[\*]
- Unknown FCFP\_2 feature: -124685461: [\*]:n:c:n:[\*]

## Feature Contribution

| Top features for positive contribution |            |                                                                                                                                  |        |
|----------------------------------------|------------|----------------------------------------------------------------------------------------------------------------------------------|--------|
| Fingerprint                            | Bit/Smiles | Feature Structure                                                                                                                | Score  |
| FCFP_2                                 | 1          | <p>AND Enantiomer</p> 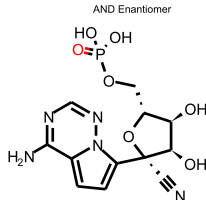 <p>[*]O[*]</p>         | 0.511  |
| FCFP_2                                 | 3          | <p>AND Enantiomer</p>  <p>[*]O</p>            | 0.104  |
| Top Features for negative contribution |            |                                                                                                                                  |        |
| Fingerprint                            | Bit/Smiles | Feature Structure                                                                                                                | Score  |
| FCFP_2                                 | 1872154524 | <p>AND Enantiomer</p>  <p>[*]C(=O)[*]</p>    | -0.307 |
| FCFP_2                                 | 0          | <p>AND Enantiomer</p>  <p>[*]C(=[*])[*]</p> | -0.29  |
|                                        |            |                                                                                                                                  |        |

|        |             |                                                                                                                                 |        |
|--------|-------------|---------------------------------------------------------------------------------------------------------------------------------|--------|
| FCFP_2 | -1272768868 | <p>AND Enantiomer</p> 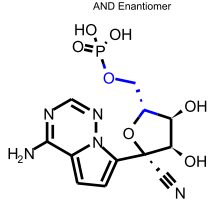 <p>[*]OCC([*])[*]</p> | -0.271 |
|--------|-------------|---------------------------------------------------------------------------------------------------------------------------------|--------|

# Patuletin

## TOPKAT Rat Oral LD50

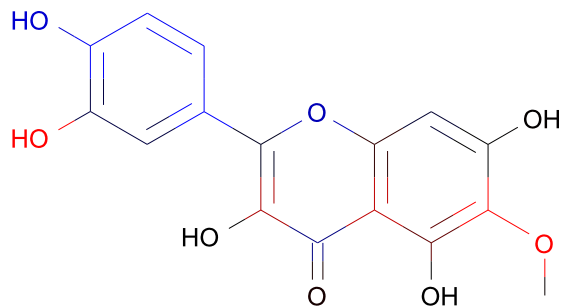
$$\text{C}_{16}\text{H}_{12}\text{O}_8$$

Molecular Weight: 332.26168

|ALogP: 1.614

Rotatable Bonds: 2

Acceptors: 8

Donors: 5

## Model Prediction

Prediction: 0.902

Unit: g/kg\_body\_weight

Mahalanobis Distance: 17.8

Mahalanobis Distance p-value: 0.00152

**Mahalanobis Distance:** The Mahalanobis distance (MD) is a generalization of the Euclidean distance that accounts for correlations among the X properties. It is calculated as the distance to the center of the training data. The larger the MD, the less trustworthy the prediction.

Mahalanobis Distance p-value: The p-value gives the fraction of training data with an MD greater than or equal to the one for the given sample, assuming normally distributed data. The smaller the p-value, the less trustworthy the prediction. For highly non-normal X properties (e.g., fingerprints), the MD p-value is wildly inaccurate.

## Structural Similar Compounds

| Name                        | QUERCETIN                                                                           | ANTHRAQUINONE; 1;5-DIAMINO-4;8-DIHYDROXY-3-(p-METHOXYPHENYL)-                       | 7H-PYRROLO[2;3-d]PYRIMIDIN-4-OL; 7-.beta.-d-RIBOFURANOSYL-                          |
|-----------------------------|-------------------------------------------------------------------------------------|-------------------------------------------------------------------------------------|-------------------------------------------------------------------------------------|
| Structure                   | 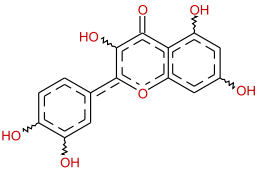 |  |  |
| Actual Endpoint (-log C)    | 3.274                                                                               | 1.771                                                                               | 4.012                                                                               |
| Predicted Endpoint (-log C) | 2.40427                                                                             | 2.1122                                                                              | 3.00148                                                                             |
| Distance                    | 0.274                                                                               | 0.657                                                                               | 0.751                                                                               |
| Reference                   | PSEBAA 77;269;51                                                                    | 28ZPAK -;245;72                                                                     | CNREA8 29;116;69                                                                    |

## Model Applicability

Unknown features are fingerprint features in the query molecule, but not found or appearing too infrequently in the training set.

1. All properties and OPS components are within expected ranges.
2. Unknown FCFP\_6 feature: 16: [\*][c](:[\*]):[\*]
3. Unknown FCFP\_6 feature: 74595001: [\*][c](:[\*]):[c](O):[cH]:[\*]
4. Unknown FCFP\_6 feature: 1618154665: [\*][c](:[\*]):[cH]:[c]([\*]):[\*]
5. Unknown FCFP\_6 feature: -1678245750: [\*]OC(=C([\*])[\*])[c](:[\*]):[\*]
6. Unknown FCFP\_6 feature: -1305924292: [\*]C(=C(O)C(=[\*])[\*])[\*]
7. Unknown FCFP\_6 feature: -549108873: [\*]:[c](:[\*])O

## Feature Contribution

### Top features for positive contribution

| Fingerprint | Bit/Smiles | Feature Structure | Score |
|-------------|------------|-------------------|-------|
|             |            |                   |       |

|                                        |            |                                                                                                                                               |        |
|----------------------------------------|------------|-----------------------------------------------------------------------------------------------------------------------------------------------|--------|
| ECFP_6                                 | 642810091  | 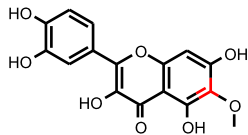<br><chem>[*][c](:[*]):[*]</chem>                          | 0.281  |
| ECFP_6                                 | 560785749  | <br><chem>[*]C(=[*])O[c](:[*]):</chem><br><chem>[*]</chem> | 0.259  |
| FCFP_6                                 | 136627117  | <br><chem>[*]OC</chem>                                     | 0.17   |
| Top Features for negative contribution |            |                                                                                                                                               |        |
| Fingerprint                            | Bit/Smiles | Feature Structure                                                                                                                             | Score  |
| ECFP_6                                 | 2106656448 | <br><chem>[*]C(=O)[*]</chem>                             | -0.352 |
| ECFP_6                                 | 683445015  | <br><chem>[*]O[*]</chem>                                 | -0.266 |

FCFP\_6

946589555

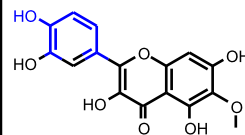

[\*][c]1:[\*]:[c]([\*]):  
[c](O):[cH]:[cH]:1

-0.204



# Remdesivir

TOPKAT\_Rat\_Oral\_LD50

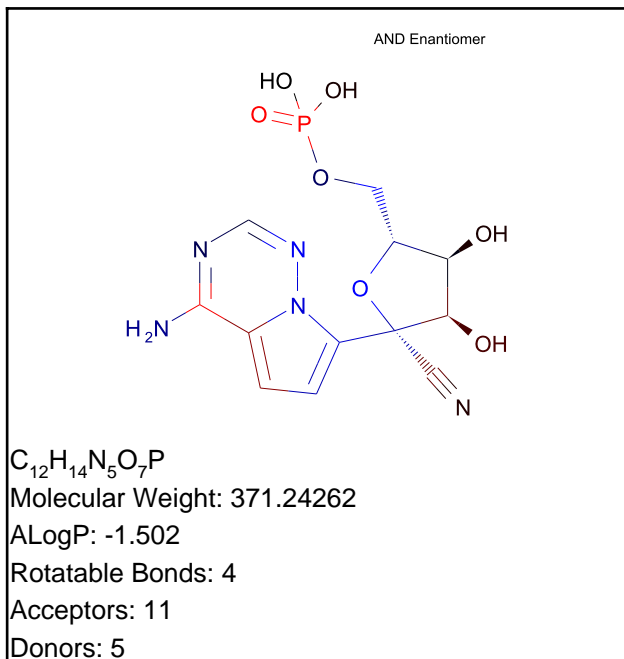

## Model Prediction

Prediction: 0.309

Unit: g/kg\_body\_weight

Mahalanobis Distance: 29.4

Mahalanobis Distance p-value: 1.72e-059

Mahalanobis Distance: The Mahalanobis distance (MD) is a generalization of the Euclidean distance that accounts for correlations among the X properties. It is calculated as the distance to the center of the training data. The larger the MD, the less trustworthy the prediction.

Mahalanobis Distance p-value: The p-value gives the fraction of training data with an MD greater than or equal to the one for the given sample, assuming normally distributed data. The smaller the p-value, the less trustworthy the prediction. For highly non-normal X properties (e.g., fingerprints), the MD p-value is wildly inaccurate.

## Structural Similar Compounds

| Name                        | 5'-ADENYLIC ACID; POTASSIUM SALT (K STRIPPED)                                       | INOSINATE; DISODIUM SALT (Na STRIPPED)                                              | INOSINE-5'-PHOSPHORIC ACID                                                          |
|-----------------------------|-------------------------------------------------------------------------------------|-------------------------------------------------------------------------------------|-------------------------------------------------------------------------------------|
| Structure                   | 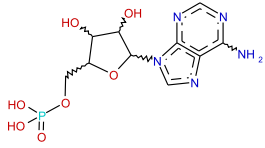 |  |  |
| Actual Endpoint (-log C)    | 1.49                                                                                | 1.34                                                                                | 1.338                                                                               |
| Predicted Endpoint (-log C) | 2.45569                                                                             | 2.92201                                                                             | 1.35922                                                                             |
| Distance                    | 0.361                                                                               | 0.428                                                                               | 0.592                                                                               |
| Reference                   | OYYAA2 4;689;70                                                                     | AJINO* -;-;73                                                                       | ARTODN 47;77;81                                                                     |

## Model Applicability

Unknown features are fingerprint features in the query molecule, but not found or appearing too infrequently in the training set.

- OPS PC10 out of range. Value: 15.526. Training min, max, SD, explained variance: -6.0395, 14.892, 2.468, 0.0220.
- Unknown ECFP\_2 feature: 1258791451: [\*][C@@H]1[\*][\*]O[C@]1(C#[\*])[c](:[\*]):[\*]
- Unknown ECFP\_2 feature: -264833661: [\*]C([\*])([\*])C#N
- Unknown ECFP\_2 feature: -66263742: [\*]C([\*])([\*])[c]1:n(:[\*]):[\*]:[\*]:c:1
- Unknown FCFP\_6 feature: 16: [\*][c](:[\*]):[\*]
- Unknown FCFP\_6 feature: 472180098: [\*]OP(=O)(O)O
- Unknown FCFP\_6 feature: -836603894: [\*][C@@H]1[\*][\*]O[C@]1(C#[\*])[c](:[\*]):[\*]
- Unknown FCFP\_6 feature: -332197802: [\*][c]1:[\*]:[\*]:[c](:[\*]):n:1:n:[\*]
- Unknown FCFP\_6 feature: 4427049: [\*]:[cH]:n:n(:[\*]):[\*]
- Unknown FCFP\_6 feature: -124685461: [\*]:n:[cH]:n:[\*]
- Unknown FCFP\_6 feature: 1747237384: [\*][c](:[\*]):n:[cH]:[\*]
- Unknown FCFP\_6 feature: -1151884458: [\*]:n:[c](N):[c](:[\*]):[\*]
- Unknown FCFP\_6 feature: 1618154665: [\*][c](:[\*]):[cH]:[c]([\*]):[\*]
- Unknown FCFP\_6 feature: 1069584379: [\*]:[c](:[\*])N

## Feature Contribution

Top features for positive contribution

| Fingerprint                            | Bit/Smiles | Feature Structure                                                                                                                   | Score  |
|----------------------------------------|------------|-------------------------------------------------------------------------------------------------------------------------------------|--------|
| ECFP_6                                 | 642810091  | <p>AND Enantiomer</p> 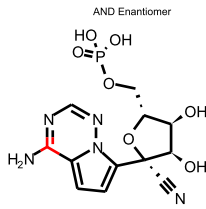 <p>[*][c](:[*]):[*]</p>   | 0.281  |
| ECFP_6                                 | -826638028 | <p>AND Enantiomer</p>  <p>[*]P(=[*])([*])[*]</p> | 0.225  |
| ECFP_6                                 | 2100964382 | <p>AND Enantiomer</p>  <p>[*]P(=O)([*])[*]</p>   | 0.166  |
| Top Features for negative contribution |            |                                                                                                                                     |        |
| Fingerprint                            | Bit/Smiles | Feature Structure                                                                                                                   | Score  |
| ECFP_6                                 | 683445015  | <p>AND Enantiomer</p>  <p>[*]O[*]</p>          | -0.266 |
|                                        |            |                                                                                                                                     |        |

|        |             |                                                                                                                                                                |        |
|--------|-------------|----------------------------------------------------------------------------------------------------------------------------------------------------------------|--------|
| ECFP_6 | 655739385   | <p>AND Enantiomer</p> 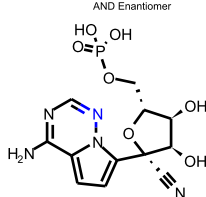 <p>[*]:n:[*]</p>                                     | -0.239 |
| FCFP_6 | -1539132615 | <p>AND Enantiomer</p>  <p>[*]C([*])([*])[c]1:[c]<br/>H]:[*]:[*]:n:1:[*]</p> | -0.2   |
